# Supplementary material for: Rapid, early and accurate SARS-CoV-2 detection using RT-qPCR in primary care: a prospective cohort study (REAP-1)
Source: PubMed Central journal article supplement — BMJ Open. 2021 Aug 2;11(8):e045225. doi: 10.1136/bmjopen-2020-045225 (PMC8331320; doi:10.1136/bmjopen-2020-045225), 2021-08-02
Supplement: bmjopen-2020-045225.draft_revisions.pdf [file bmjopen-2020-045225.draft_revisions.pdf]

# BMJ Open

BMJ Open is committed to open peer review. As part of this commitment we make the peer review history of every article we publish publicly available.

When an article is published we post the peer reviewers' comments and the authors' responses online. We also post the versions of the paper that were used during peer review. These are the versions that the peer review comments apply to.

The versions of the paper that follow are the versions that were submitted during the peer review process. They are not the versions of record or the final published versions. They should not be cited or distributed as the published version of this manuscript.

BMJ Open is an open access journal and the full, final, typeset and author-corrected version of record of the manuscript is available on our site with no access controls, subscription charges or pay-per-view fees (<http://bmjopen.bmj.com>).

If you have any questions on BMJ Open's open peer review process please email [info.bmjopen@bmj.com](mailto:info.bmjopen@bmj.com)

# BMJ Open

## Rapid, early and accurate SARS-CoV-2 detection during a COVID-19 outbreak in Austria: Evidence of effective sentinel surveillance screening in primary care

|                               |                                                                                                                                                                                                                                                                                                                                                                                                                                                                                                                                                                                                                                                                                                                                                                                                                                                                                                                                                                                                                                                                                                                                                                                                                                                                                                                                                                                                                                                                                                                                                                                                                                                                                                                                                                                                                                                                                                           |
|-------------------------------|-----------------------------------------------------------------------------------------------------------------------------------------------------------------------------------------------------------------------------------------------------------------------------------------------------------------------------------------------------------------------------------------------------------------------------------------------------------------------------------------------------------------------------------------------------------------------------------------------------------------------------------------------------------------------------------------------------------------------------------------------------------------------------------------------------------------------------------------------------------------------------------------------------------------------------------------------------------------------------------------------------------------------------------------------------------------------------------------------------------------------------------------------------------------------------------------------------------------------------------------------------------------------------------------------------------------------------------------------------------------------------------------------------------------------------------------------------------------------------------------------------------------------------------------------------------------------------------------------------------------------------------------------------------------------------------------------------------------------------------------------------------------------------------------------------------------------------------------------------------------------------------------------------------|
| Journal:                      | <i>BMJ Open</i>                                                                                                                                                                                                                                                                                                                                                                                                                                                                                                                                                                                                                                                                                                                                                                                                                                                                                                                                                                                                                                                                                                                                                                                                                                                                                                                                                                                                                                                                                                                                                                                                                                                                                                                                                                                                                                                                                           |
| Manuscript ID                 | bmjopen-2020-045225                                                                                                                                                                                                                                                                                                                                                                                                                                                                                                                                                                                                                                                                                                                                                                                                                                                                                                                                                                                                                                                                                                                                                                                                                                                                                                                                                                                                                                                                                                                                                                                                                                                                                                                                                                                                                                                                                       |
| Article Type:                 | Original research                                                                                                                                                                                                                                                                                                                                                                                                                                                                                                                                                                                                                                                                                                                                                                                                                                                                                                                                                                                                                                                                                                                                                                                                                                                                                                                                                                                                                                                                                                                                                                                                                                                                                                                                                                                                                                                                                         |
| Date Submitted by the Author: | 30-Sep-2020                                                                                                                                                                                                                                                                                                                                                                                                                                                                                                                                                                                                                                                                                                                                                                                                                                                                                                                                                                                                                                                                                                                                                                                                                                                                                                                                                                                                                                                                                                                                                                                                                                                                                                                                                                                                                                                                                               |
| Complete List of Authors:     | <p>Leber, Werner; Queen Mary University of London, Centre for Primary Care and Public Health<br/> Lammel, Oliver; Praxis Dr Lammel<br/> Redlberger-Fritz, Monika; Medical University of Vienna<br/> Mustafa-Korninger, Maria Elisabeth; 4 Medizinisch-chemisches Labor Dr. Mustafa, Dr. Richter OG<br/> Glehr, Reingard Christina; Medical University of Graz<br/> Camp, Jeremy; Medical University of Vienna<br/> Agerer, Benedikt; Research Center for Molecular Medicine of the Austrian Academy of Sciences<br/> Lercher, Alexander; Research Center for Molecular Medicine of the Austrian Academy of Sciences<br/> Popa, Alexandra; Research Center for Molecular Medicine of the Austrian Academy of Sciences<br/> Genger, Jakob-Wendelin; Research Center for Molecular Medicine of the Austrian Academy of Sciences<br/> Penz, Thomas; Research Center for Molecular Medicine of the Austrian Academy of Sciences<br/> Aberle, Stephan; Medical University of Vienna<br/> Bock, Christoph; Research Center for Molecular Medicine of the Austrian Academy of Sciences<br/> Bergthaler, Andreas; Research Center for Molecular Medicine of the Austrian Academy of Sciences<br/> Stiasny, Karin; Medical University of Vienna<br/> Hochstrasser, Eva-Maria; Praxis Dr Lammel<br/> Hoellinger, Christian; Paracelsus Medical Private University<br/> Siebenhofer, Andrea; Institute of General Practice and Evidence-based Health Services Research, Medical University Graz; Institute for General Practice, Goethe University<br/> Griffiths, Chris; Barts and The London School of Medicine and Dentistry, Panovska-Griffiths, Jasmina; NIHR CLAHRC North Thames, Department of Applied Health Research, University College London, London, United Kingdom, ; Department of Global Health and Development, London School of Hygiene and Tropical Medicine, 15-17 Tavistock Place, WC1H 9SH,</p> |
| Keywords:                     | PRIMARY CARE, COVID-19, Public health < INFECTIOUS DISEASES, VIROLOGY                                                                                                                                                                                                                                                                                                                                                                                                                                                                                                                                                                                                                                                                                                                                                                                                                                                                                                                                                                                                                                                                                                                                                                                                                                                                                                                                                                                                                                                                                                                                                                                                                                                                                                                                                                                                                                     |

1  
2  
3  
4  
5  
6  
7  
8  
9  
10  
11  
12  
13  
14  
15  
16  
17  
18  
19  
20  
21  
22  
23  
24  
25  
26  
27  
28  
29  
30  
31  
32  
33  
34  
35  
36  
37  
38  
39  
40  
41  
42  
43  
44  
45  
46  
47  
48  
49  
50  
51  
52  
53  
54  
55  
56  
57  
58  
59  
60

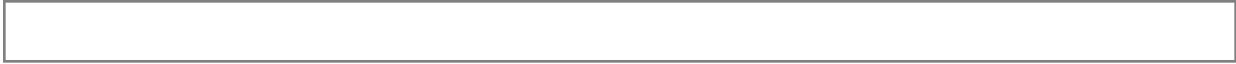

SCHOLARONE™  
Manuscripts

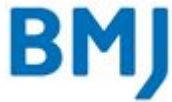

I, the Submitting Author has the right to grant and does grant on behalf of all authors of the Work (as defined in the below author licence), an exclusive licence and/or a non-exclusive licence for contributions from authors who are: i) UK Crown employees; ii) where BMJ has agreed a CC-BY licence shall apply, and/or iii) in accordance with the terms applicable for US Federal Government officers or employees acting as part of their official duties; on a worldwide, perpetual, irrevocable, royalty-free basis to BMJ Publishing Group Ltd ("BMJ") its licensees and where the relevant Journal is co-owned by BMJ to the co-owners of the Journal, to publish the Work in this journal and any other BMJ products and to exploit all rights, as set out in our [licence](#).

The Submitting Author accepts and understands that any supply made under these terms is made by BMJ to the Submitting Author unless you are acting as an employee on behalf of your employer or a postgraduate student of an affiliated institution which is paying any applicable article publishing charge ("APC") for Open Access articles. Where the Submitting Author wishes to make the Work available on an Open Access basis (and intends to pay the relevant APC), the terms of reuse of such Open Access shall be governed by a Creative Commons licence – details of these licences and which [Creative Commons](#) licence will apply to this Work are set out in our licence referred to above.

Other than as permitted in any relevant BMJ Author's Self Archiving Policies, I confirm this Work has not been accepted for publication elsewhere, is not being considered for publication elsewhere and does not duplicate material already published. I confirm all authors consent to publication of this Work and authorise the granting of this licence.

1  
2  
3  
4  
5  
6  
7  
8  
9  
10  
11  
12  
13  
14  
15  
16  
17  
18  
19  
20  
21  
22  
23  
24  
25  
26  
27  
28  
29  
30  
31  
32  
33  
34  
35  
36  
37  
38  
39  
40  
41  
42  
43  
44  
45  
46  
47  
48  
49  
50  
51  
52  
53  
54  
55  
56  
57  
58  
59  
60

1 Title: Rapid, early and accurate SARS-CoV-2 detection during a COVID-19 outbreak in  
2 Austria: Evidence of effective sentinel surveillance screening in primary care

3  
4 Date: September 30, 2020

5  
6 Version: 1.0

7  
8 Co-authors

9  
10 Werner Leber<sup>1,\*,&</sup>

11 Oliver Lammel<sup>2</sup>

12 Monika Redlberger-Fritz<sup>3</sup>

13 Maria Elisabeth Mustafa-Korninger<sup>4</sup>

14 Reingard Christina Glehr<sup>5</sup>

15 Jeremy V. Camp<sup>3</sup>

16 Benedikt Agerer<sup>6</sup>

17 Alexander Lercher<sup>6</sup>

18 Alexandra M. Popa<sup>6</sup>

19 Jakob-Wendelin Genger<sup>6</sup>

20 Thomas Penz<sup>6</sup>

21 Stephan Aberle<sup>3</sup>

22 Christoph Bock<sup>6</sup>

23 Andreas Bergthaler<sup>6</sup>

24 Karin Stiasny<sup>3</sup>

25 Eva-Maria Hochstrasser<sup>2</sup>

26 Christian Hoellinger<sup>7</sup>

27 Andrea Siebenhofer<sup>5,8</sup>

28 Chris Griffiths<sup>1</sup>

29 Jasmina Panovska-Griffiths<sup>9,10,11,\*,&</sup>

For peer review only

1  
2  
3 31 <sup>1</sup> Centre for Clinical Effectiveness and Health Data Science, Institute of Population Health Sciences, Barts School  
4 32 of Medicine and Dentistry, Queen Mary University of London, London, UK

5  
6 33 <sup>2</sup> Practice Dr. Lammel, Ramsau am Dachstein, Austria

7  
8 34 <sup>3</sup> Center for Virology, Medical University of Vienna, Vienna, Austria

9  
10 35 <sup>4</sup> Medizinisch-chemisches Labor Dr. Mustafa, Dr. Richter OG, Salzburg, Austria

11  
12 36 <sup>5</sup> Institute of General Practice and Evidence-based Health Services Research, Medical University of Graz, Graz,  
13 37 Austria

14  
15 38 <sup>6</sup> CeMM Research Center for Molecular Medicine of the Austrian Academy of Sciences, Vienna, Austria

16  
17 39 <sup>7</sup> Paracelsus Medical University, Salzburg, Austria

18  
19 40 <sup>8</sup> Institute of General Practice, Goethe-University Frankfurt am Main, Frankfurt am Main, Germany

20  
21 41 <sup>9</sup> Department of Applied Health Care, Institute of Epidemiology & Health Care, University College London,  
22 42 London

23  
24 43 <sup>10</sup> Institute for Global Health, University College London, London, UK

25  
26 44 <sup>11</sup> The Queen's College, University of Oxford, Oxford, UK

27  
28 45

29  
30 46 & these authors contributed equally

31  
32 47 \* Corresponding authors: [w.leber@qmul.ac.uk](mailto:w.leber@qmul.ac.uk), [j.panovska-griffiths@ucl.ac.uk](mailto:j.panovska-griffiths@ucl.ac.uk)

33  
34 48

35  
36 49 **ABSTRACT**

37  
38 50 **Objectives:** We explore the importance of SARS-CoV-2 sentinel surveillance testing in primary care during a  
39 51 regional COVID-19 outbreak in Austria.

40  
41 52 **Design:** Prospective cohort study.

42  
43 53 **Setting:** A single sentinel practice serving 22,829 people in the ski-resort of Schladming-Dachstein.

44  
45 54 **Participants:** All 73 patients presenting with mild-to-moderate flu-like symptoms between 24 February and 03  
46 55 April, 2020.

47  
48 56 **Intervention:** Nasopharyngeal sampling to detect SARS-CoV-2 using real-time reverse transcriptase-polymerase  
49 57 chain reaction (RT-qPCR).

50  
51 58 **Outcome measures:** We compared RT-qPCR at presentation with confirmed antibody status. We split the  
52 59 outbreak in two parts, by halving the period from the first to the last case, to characterise three cohorts of patients  
53 60 with confirmed infection: early acute (RT-qPCR reactive) in the first half; and late acute (reactive) and late  
54 61 convalescent (non-reactive) in the second half. For each cohort we report the number of cases detected, the  
55 62 accuracy of RT-qPCR, the duration and variety of symptoms, and the number of viral clades present.

1  
2  
3 63 **Results:** Twenty-two patients were diagnosed with COVID-19 (8 early acute, 7 late acute and 7 late convalescent),  
4 64 44 patients tested SARS-CoV-2 negative, and 7 were excluded. The sensitivity of RT-qPCR was 100% among all  
5 65 acute cases, dropping to 68.1% when including convalescent. Test specificity was 100%. Mean duration of  
6 66 symptoms for each group were 2 days (range 1-4) among early acute, 4.4 days (1-7) among late acute and 8 days  
7 67 (2-12) among late convalescent. Confirmed infection was associated with loss of taste. Acute infection was  
8 68 associated with loss of taste, nausea/vomiting, breathlessness, sore throat and myalgia; but not anosmia, fever or  
9 69 cough. Transmission clusters of three viral clades (G, GR and L) were identified.

10 68 associated with loss of taste, nausea/vomiting, breathlessness, sore throat and myalgia; but not anosmia, fever or  
11 69 cough. Transmission clusters of three viral clades (G, GR and L) were identified.  
12 70  
13 71 **Conclusions:** RT-qPCR testing in primary care can rapidly and accurately detect SARS-CoV-2 among people  
14 72 with flu-like illness in a heterogenous viral outbreak. Targeted testing in primary care can support national sentinel  
15 73 surveillance of coronavirus.  
16 74

#### 17 74 **Strengths and limitations of this study**

- 18 75 • Our study was conducted in a state-of-the-art sentinel surveillance practice, participating in the Austrian  
19 76 National Influenza Screening Programme, covering the entire period of a regional COVID-19 outbreak.
- 20 77 • Symptomatic patients received same-day appointments for nasopharyngeal swabs, and people testing RT-PCR  
21 78 reactive were notified within 24 hours.
- 22 79 • Cases were confirmed using a combination of five different ELISA platforms and neutralising antibody assay.
- 23 80 • The relatively small patient cohort from a single testing site limits conclusions on causality and  
24 81 generalisability.
- 25 82 • Any difference in symptoms observed between study cohorts may be due to recall bias occurred, particularly  
26 83 among those people presenting late.  
27 84

## 28 85 **INTRODUCTION**

29 86 The coronavirus 2019 disease (COVID-19) pandemic, caused by severe acute respiratory syndrome coronavirus  
30 87 2 (SARS-CoV-2), continues to spread globally with more than 25 million cases, and over 850,000 deaths reported  
31 88 as of August 31, 2020. Undetected infection and delays in implementing an effective test-trace-isolate (TTI)  
32 89 strategy have contributed to the spread of the virus becoming a pandemic. SARS-CoV-2 virus has a wide spectrum  
33 90 of manifestations including no symptoms (asymptomatic infection), mild to moderate to severe flu-like illness,  
34 91 loss of taste or smell, pneumonia and acute respiratory distress syndrome (ARDS), sepsis, multi-organ failure and  
35 92 death.<sup>1</sup> In studies to date, the reported time for the infection to become symptomatic (incubation period) varies  
36 93 among different cohorts and settings, with a median incubation period around 5.1 days,<sup>2</sup> infectivity starting 2.3  
37 94 days before symptom onset, peaking 1-2 days before that,<sup>3,4</sup> and gradually declining over 7-10 days.<sup>5,6</sup>  
38 95

39 96 SARS-CoV-2 has the potential for 'superspreading' events, resulting in clusters of disease outbreaks among a  
40 97 large number of people. Although most infections remain isolated cases, a small number of individuals (10%)  
41 98 may cause up to 80% of secondary transmissions.<sup>7</sup> Undocumented infection may constitute the majority of cases  
42 99 (86%), causing more than half (55%) of all documented infections.<sup>8</sup> Superspreading events have been reported  
43 100 from across the globe, and countries achieving early viral suppression took rapid and decisive action to implement

1  
2  
3 101 comprehensive case identification and testing, combined with contact tracing and isolation.<sup>9,10</sup> For epidemic  
4 102 control of COVID-19, the effective reproduction number,  $R_e$ , needs to be less than 1; the presence of undetected  
5 103 and persistent infection within the population, even if very small, can increase  $R_e$  and induce a secondary peak of  
6 104 infections. Therefore, rapid identification and containment of infection is a key factor for the prevention of onward  
7 105 transmission and controlling the virus to protect the public.<sup>11</sup>  
8  
9  
10  
11

12  
13 107 In Austria, the first two COVID-19 cases were reported among travelers from Italy in the city of Innsbruck on  
14 108 February 25, 2020.<sup>12</sup> Multiple superspreading events then occurred among tourists visiting Austrian ski-resorts,  
15 109 including the town of Ischgl, that are believed to have led to further outbreaks in the tourists' home countries,  
16 110 including Germany, Denmark and Sweden.<sup>12,13</sup> Austria was one of the first countries to adopt comprehensive  
17 111 lockdown measures on March 16, 2020, including protection of vulnerable groups, penalty fees for breaching  
18 112 self-isolation, and a national health hotline to facilitate testing at acute care settings and *via* mobile units.<sup>14</sup> The  
19 113 first death from COVID-19 associated complications occurred on March 12, 2020, and as of August 31, 27,166  
20 114 cases and 733 COVID-19 related deaths have been reported.  
21  
22  
23  
24  
25

26 116 General practice (GP) is considered a key partner in case recording, managing high-risk groups and delivery of  
27 117 equitable care.<sup>15-17</sup> The European Centre for Disease Prevention and Control (ECDC) recommended integration  
28 118 of "COVID-19 surveillance with sentinel surveillance of influenza-like illness or acute respiratory infection."<sup>18</sup>  
29 119 However, in some countries, like the UK and the USA, primary care has been largely excluded from the national  
30 120 TTI strategy.<sup>19</sup> In contrast, Austria additionally offered SARS-CoV-2 real-time reverse transcriptase-polymerase  
31 121 chain reaction (RT-qPCR) testing to people presenting with mild to moderate flu-like symptoms to any of the 92  
32 122 sentinel surveillance sites (GPs and paediatric practices) beginning February 24, 2020.<sup>20</sup> The new service  
33 123 supplemented the existing national health hotline for people at risk of COVID-19.<sup>21</sup> RT-qPCR is an established  
34 124 technique to detect viral RNA from nasopharyngeal sampling used to diagnose COVID-19.<sup>22</sup> Early detection of  
35 125 SARS-CoV-2 is essential for effective contact tracing,<sup>23</sup> and whole genome sequencing may provide data on  
36 126 dynamics of transmission.<sup>13</sup>  
37  
38  
39  
40  
41  
42

43 127  
44  
45 128 The overall aim of this work is to test whether rapid early RT-qPCR testing in primary care can accurately and  
46 129 timely detect SARS-CoV-2, and inform outbreak surveillance. To attest this, we report the outcomes of SARS-  
47 130 CoV-2 RT-qPCR testing at a sentinel GP in the ski-resort of Schladming-Dachstein, Austria. We report a) the  
48 131 accuracy (via sensitivity and specificity) of rapidly deployed RT-qPCR testing in patients presenting with acute  
49 132 infection by comparing it to anti-SARS-CoV-2 antibody status during convalescence in the same geographically  
50 133 defined study cohort; b) the earliness of viral RNA detection by comparing the duration, number and type of  
51 134 symptoms among patients presenting during the first half (early presenters) and the second half (late presenters)  
52 135 of the outbreak, measured by the number of days from the first to the last case detected and dividing that period  
53 136 by two; c) the identification of key clinical symptoms of acute and convalescent disease and determine a  
54 137 correlation between these; and d) the number of SARS-CoV-2 clades implicated in the outbreak.  
55  
56  
57  
58  
59  
60



## 139 **METHODS**

### 140 **Setting**

141 This study was set in a sentinel GP participating in the National Influenza Surveillance Network in the ski-resort  
142 of Schladming-Dachstein, political subdistrict of Groebming (population 22,829), Austria. The study was  
143 conducted during a local COVID-19 outbreak in March and April 2020, during which 29 cases were detected by  
144 RT-qPCR locally. The bulk of the outbreak occurred after a 3-day party (March 13-15) prior to implementation  
145 of the national lockdown policy on March 16, which led to premature termination of the skiing season. All patients  
146 presenting with mild to moderate flu-like illness were included. Following the report of the first cases in Austria,  
147 people with flu-like symptoms were advised to call the national health hotline instead of directly presenting to the  
148 hospital or GP. Patients were advised to phone the GP or receive in-home testing by mobile testing units, and  
149 home self-isolate and self-care.

### 151 **Design**

152 We conducted a longitudinal evaluation comprising a prospective cohort to examine the impact of SARS-Cov-2  
153 RT-qPCR testing on COVID-19 case detection. Between February 24 and April 03, 2020, RT-qPCR testing and  
154 seropositivity data were collected to compare two groups within this cohort of patients:

- 155 • Patients testing RT-qPCR reactive at presentation with acute disease
- 156 • Patients confirmed anti-SARS-CoV-2 antibody positive during the convalescence phase (confirmed infection).

157 We define acute disease as the presence of flu-like symptoms combined with reactive SARS-CoV-2 RT-qPCR  
158 and positive serostatus; and confirmed infection as the presence of convalescent anti-SARS-CoV-2 antibody 3-6  
159 weeks after the acute illness, irrespective of the RT-qPCR result.

### 161 **Intervention**

162 On February 24, 2020, one day before the first two cases were reported in Austria, the National Influenza  
163 Screening Network was enhanced to include SARS-CoV-2 RT-qPCR testing.

164 Patients with mild to moderate flu-like symptoms calling the study sentinel GP were offered same day  
165 appointments for SARS-CoV-2 RT-qPCR testing. RT-qPCR results were available within 24 hours, and those  
166 patients with a reactive outcome were immediately notified by a clinician and advised to self-isolate for a  
167 minimum of two weeks following national policy at that time. Repeat follow-up RT-qPCR was arranged by the  
168 local public health authority (District Commissioner of Liezen, Austria), and people testing non-reactive on repeat  
169 RT-qPCR were released from self-isolation. After 3-6 weeks, venous blood was obtained to confirm SARS-CoV-2  
170 infection using ELISA IgG and neutralizing antibody assay. We defined the period of the outbreak as the number  
171 of days from the first patient to the last patient testing RT-qPCR reactive at the GP.

172  
173 Since the winter season 2000/2001, the National Influenza Screening Network has conducted influenza screening  
174 for patients attending sentinel GPs and paediatric practices. Between November and March of each year,

1  
2  
3 175 participating practices routinely collect nasopharyngeal swabs from patients presenting with flu-like symptoms.  
4 176 Specimens are sent to the Center for Virology, Medical University of Vienna, Austria, for virus isolation on tissue  
5 177 cultures and PCR detection. This surveillance programme allows for near real-time recording of seasonal  
6 178 influenza virus activity in the country.  
7  
8  
9

179

## 11 180 **Outcome measures**

12  
13 181 We characterise the outbreak using the following four testing, clinical and viral genomic outcomes: A) The  
14 182 diagnostic accuracy (using sensitivity and specificity) of SARS-CoV-2 RT-qPCR among patients with mild to  
15 183 moderate flu-like symptoms at presentation by comparing molecular diagnosis with anti-SARS-CoV-2 antibody  
16 184 testing during convalescence, and hospital admission and death, including any alternative diagnoses for patients  
17 185 testing SARS-CoV-2 negative; B) The earliness of RT-qPCR testing by comparing the duration and number of  
18 186 symptoms during the first half of the outbreak (early presenters) and during the second half of the outbreak (late  
19 187 presenters); C) The key clinical symptoms associated with RT-qPCR reactivity (acute infection) and convalescent  
20 188 seropositivity (confirmed infection) to determine any potential correlation between these stages of disease; and  
21 189 D) the viral clades detected in the outbreak.  
22  
23  
24  
25

190

## 28 191 **Clinical data**

29  
30 192 We obtained anonymous patient data held within the GP computer system. The practice lead clinician (OL)  
31 193 generated a clinical master case report form before extracting pseudonymised patient records into an Excel  
32 194 spreadsheet. EMH and CH verified the accuracy of the data extraction for all patients. Data were stored on a  
33 195 secure computer at the Institute of General Practice and Evidence-based Health Services Research, University of  
34 196 Graz, Austria, before sharing it with the study statistician (JPG) using encrypted email and secure storage at the  
35 197 University of Oxford, UK.  
36  
37  
38  
39

198

## 41 199 **Testing**

### 43 200 **RT-qPCR**

44 201 SARS-CoV-2 RT-qPCR was performed in scope of the routine surveillance at the Center for Virology, Medical  
45 202 University of Vienna on a Roche LightCycler (<http://www.roche.com>; Switzerland) using a primer-set provided  
46 203 by TIB MOLBIOL (<https://www.tib-molbiol.com/>; Germany).<sup>22</sup> RT-qPCR targeting the E-gene was considered  
47 204 reactive at a cycle threshold (Ct) value of less than 40, and Ct values above 32 were confirmed by RNA-dependent  
48 205 RNA polymerase (RdRP) gene detection.  
49  
50

### 52 206 **Enzyme linked immune assays (ELISA)**

53 207 IgG serostatus assays were performed according to the manufacturers' protocol using five different commercial  
54 208 test kits of Anti-SARS-CoV-2 IgG enzyme immune linked assays (ELISA) provided by the following companies:  
55 209 EUROIMMUN (EUROIMMUN Medizinische Labordiagnostika AG, [www.euroimmun.com](http://www.euroimmun.com)),<sup>24</sup> and EPITOPE  
56 210 DIAGNOSTICS (Immunodiagnostik AG [www.euroimmun.com](http://www.euroimmun.com)) respectively.<sup>25</sup> Reagent wells of the Anti-  
57 211 SARS-CoV-2 IgG ELISA are coated with recombinant antigen derived from the spike protein (S1 domain) of  
58  
59  
60

1  
2  
3 212 SARS-CoV-2. Reagent wells of the EDI™ Novel Coronavirus COVID-19 IgG ELISA are coated with COVID-  
4 213 19 recombinant full length nucleocapsid protein. ABBOTT performed on the Architect platform (ABBOTT  
5 214 LABORATORIES INC., [www.abbott.com](http://www.abbott.com)), DIASORIN (DIASORIN S.p.A, <https://www.diasorin.com/home>)  
6 215 performed on the LIAISON® platform and ROCHE performed on the cobas e 801 analyzer. The Abbott SARS-  
7 216 CoV-2 IgG assay is a chemiluminescent microparticle immunoassay (CMIA) for the qualitative detection of IgG  
8 217 against a recombinant SARS-CoV-2 nucleoprotein. Results are reported in form of an index value (S/C).  
9 218 LIAISON® SARS-CoV-2 S1/S2 IgG assay is a chemiluminescence immunoassay (CLIA) for the quantitative  
10 219 detection of IgG against the recombinant S1 and S2 domain of the spike protein. Results are reported in arbitrary  
11 220 units (AU/mL). Elecsys® Anti-SARS-CoV-2 assay (Roche Diagnostics) is a electrochemiluminescence  
12 221 immunoassay (ECLIA) for qualitative detection of CoV2 antibodies in human serum against a recombinant  
13 222 nucleocapsid protein of SARS-CoV-2. It is a total antibody assay not differentiating between IgA, IgM or IgG but  
14 223 detecting IgG predominantly. Results are reported as numeric values in form of signal sample/cutoff (COI).

#### 21 Neutralising antibody assay

22  
23 225 Samples with discordant antibody results (see below) were further evaluated using an in-house neutralising  
24 226 antibody assay as follows: Serial dilutions of heat-inactivated serum samples were incubated with 50-100 TCID50  
25 227 SARS-CoV-2 (hCoV-19/Austria/CeMM0360/2020; GISAID EPI\_ISL: 438123) for 1h at 37 °C. The mixture was  
26 228 added to Vero E6 (ATCC ® CRL-1586) cell monolayers and incubation was continued for two to three days. NT  
27 229 titers were expressed as the reciprocal of the serum dilution that protected against virus-induced cytopathic effects.  
28 230 NT titers  $\geq 10$  were considered positive. The study has been reported in accordance with STARI reporting  
29 231 guidelines for implementation studies.<sup>26</sup>

30  
31  
32  
33  
34

#### 35 233 **Statistical analysis**

36  
37 234 We present a descriptive statistics of patient demographics including age, gender and ethnicity; and the following  
38 235 four outcomes:

39  
40 236 **Outcome A:** We tested the diagnostic accuracy of RT-qPCR, by determining its sensitivity and specificity. To do  
41 237 this, we stratified RT-qPCR results in four groups: true reactive (RT-qPCR reactive and confirmed antibody  
42 238 positive); false reactive (RT-qPCR reactive, antibody negative); true non-reactive (RT-qPCR non-reactive,  
43 239 antibody negative); and false non-reactive (RT-qPCR non-reactive, antibody positive).

44  
45  
46 240 **Outcome B:** We calculated the earliness of RT-qPCR testing by determining the mean duration of symptoms, in  
47 241 days (range), and mean number of symptoms (range), across the three cohorts of patients with confirmed infection:  
48 242 early acute, late acute and late convalescent. The three cohorts were obtained by stratifying people with confirmed  
49 243 infection according to the date of presentation to the GP during the outbreak as follows: people presenting with  
50 244 acute infection (RT-qPCR reactive, confirmed antibody positive) during the first half of the outbreak (early acute  
51 245 disease) vs. those people presenting during the second half of the outbreak (late acute); and those people presenting  
52 246 with previous disease (RT-qPCR non-reactive but confirmed antibody positive) in the second half of the outbreak  
53 247 (late convalescent).

54  
55  
56  
57  
58 248 **Outcome C:** Multivariate logistic regression tested the association of 15 clinical symptoms with RT-qPCR  
59 249 reactivity at presentation and among all patients with confirmed infection. We reported the odds ratios (ORs) and

the significance value ( $p$ ) of each covariate on testing RT-qPCR reactive, and confirmed positive antibody status respectively. We quantified the association between patients with reactive RT-qPCR (and confirmed antibody positive) and all patients with confirmed infection by calculating the correlation coefficient  $r$ , and estimating the 95% CI.

**Outcome D:** For clade analysis, SARS-CoV-2 full genome sequencing was undertaken as part of a wider study covering the whole of Austria.<sup>13</sup> The full-length sequences were matched to patient records by an anonymized unique identifier and uploaded to the Global Initiative on Sharing All Influenza Data (GISAID) database (<http://gisaid.org>).<sup>27</sup> Sequences were aligned in MEGA7 and non-synonymous nucleotide variants were identified to determine the respective clades, following the GISAID classification scheme for lineages.<sup>28</sup>

## RESULTS

### Overall testing results

Baseline characteristics for confirmed cases were similar for sex, age, and ethnic origin (Table 1). All patients were local residents and no endemic cases were documented among tourists. Figure 1 shows the flow-chart for the patient cohorts of this study. 73 patients presented with mild to moderate flu-like illness, all of whom received SARS-CoV-2 RT-qPCR (and influenza qPCR). Of those, 16 (21.9%) tested RT-qPCR reactive and 57 (78.1%) tested non-reactive, including four that tested influenza PCR reactive. Due to lack of venous blood sampling (obtained 3-6 weeks after initial presentation), antibody data was not available for 7 patients (1 RT-qPCR reactive vs. 6 non-reactive) that were excluded from this analysis. Therefore, of the 66 patients included in this analysis, 22 patients (33.3%) had SARS-CoV-2 infection confirmed by antibody testing and 44 (66.7%) patients were confirmed seronegative. Of the former, eight patients (early acute presenters) presented in the first half of the outbreak (12 days from March 11 to 22, 2020) and 14 patients presented in the second half (March 23 to April 03, 2020); of the latter, seven patients were late acute and seven late convalescent (Figure 2A). Alternative diagnoses of the 44 patients who tested SARS-CoV-2 negative included: influenza and infectious mononucleosis (N=2, each); bacterial tonsillitis, bacterial pneumonia, bronchitis and exacerbation of chronic obstructive pulmonary disease (COPD) (N=1, each) (see flow-chart, Figure 1). No hospital admissions or deaths were reported.

**Table 1: Summary of the demographic characteristics of COVID-19 cases.**

|             | People with confirmed infection<br>(seropositive, any RT-qPCR result)<br>(N=22) | People with acute infection<br>(RT-qPCR reactive and seropositive)<br>(N=15) |
|-------------|---------------------------------------------------------------------------------|------------------------------------------------------------------------------|
| Sex         |                                                                                 |                                                                              |
| Female      | 14 (63.6%)                                                                      | 9 (60%)                                                                      |
| Male        | 8 (36.4%)                                                                       | 6 (40%)                                                                      |
| Age (years) |                                                                                 |                                                                              |
| 16-24       | 4 (26.7%)                                                                       | 3 (20%)                                                                      |

|               |           |           |
|---------------|-----------|-----------|
| 25-34         | 4 (26.7%) | 2 (13.3%) |
| 35-49         | 6 (40%)   | 4 (26.7%) |
| >50           | 8 (36.4%) | 6 (40%)   |
| Ethnic origin |           |           |
| White         | 22 (100%) | 15 (100%) |

278

### 279 **Specificity and sensitivity of RT-qPCR**

280 In the absence of a gold standard, we used a consensus statement on serostatus, irrespective of RT-qPCR  
 281 outcomes, to establish whether an infection had occurred. We considered an infection as confirmed in any patient  
 282 who tested IgG ELISA positive on all five screening platforms (concordant results) or in any patient with  
 283 mismatch between ELISA test results (discordant results) but positive neutralising antibody assay (see flow-chart,  
 284 Figure 1). Of the 15 patients with reactive RT-qPCR, sera from nine patients were concordant positive and six  
 285 were discordant; and of the 53 patients with non-reactive RT-qPCR, sera from 41 patients were concordant  
 286 negative, 5 were concordant positive, and three were discordant. Sera from two patients diagnosed with influenza  
 287 who tested RT-qPCR non-reactive were concordant negative and included in this analysis. For the nine patients  
 288 with discordant results, we used neutralising antibody assay to confirm infection status. All patients (N=6) with  
 289 reactive RT-qPCR were neutralising antibody positive; and of the 3 patients with non-reactive RT-qPCR, two  
 290 were neutralising antibody positive, and one was negative. Therefore, overall, when combining ELISA and  
 291 neutralising antibody assay, 22 patients had confirmed infection, of whom 15 patients were RT-qPCR reactive  
 292 (true reactive) and 7 were non-reactive (false non-reactive). There were no false reactive RT-qPCR results.  
 293 Therefore, RT-qPCR correctly identified infection in 15/22 patients (overall sensitivity of 68.1%). Sensitivity of  
 294 RT-qPCR among all acute (early and late) presenters and during the first half of the outbreak was high (100%),  
 295 but dropped to 50% in the second half of the outbreak. RT-qPCR correctly identified absence of infection for all  
 296 44 patients testing antibody negative (true non-reactive) indicating specificity of 100%.

297

### 298 **Earliness of RT-qPCR testing**

299 The mean duration of symptoms was 2 days (range 1-4) among early acute presenters, 4.4 days (range 1-7) among  
 300 late acute presenters, 8 days (range 2-12) among people with late convalescent infection, and 3.9 days (range 1-  
 301 14) among non-COVID-19 controls (Figure 2B). The mean number of symptoms was 6.75 (range 4-9) among  
 302 early acute presenters, 6.86 (3-12) among late acute presenters, 6.3 (1-11) among people with convalescent  
 303 infection, and 5.23 (range 2-11) among non-COVID-19 controls (Figure 2C).

304

### 305 **Regression analysis on confirmed infection**

306 Multivariate regression on all 66 patients, including 22 (31.9%) with confirmed infection, suggested that loss of  
 307 taste, but not loss of smell, was the key covariate significantly associated with positive serostatus (ORs=6.03;

p=0.047) (Table 2). Breathlessness (OR=6.9, p=0.054) and cough (OR=0.12, p=0.053) were also possible covariates of confirmed infection.

**Table 2: Regression analysis on symptoms reported by patients diagnosed with COVID-19.**

| Clinical symptom | People with confirmed infection (seropositive, any RT-qPCR result) (N=22) |               |         | People with acute disease (RT-qPCR reactive and seropositive) (N=15) |                 |         |
|------------------|---------------------------------------------------------------------------|---------------|---------|----------------------------------------------------------------------|-----------------|---------|
|                  | Odds ratio                                                                | 95% CI        | p-value | Odds ratio                                                           | 95% CI          | p-value |
| Change in taste  | 6.02                                                                      | (1.02,35.51)  | 0.047   | 571.72                                                               | (1.92,170629.2) | 0.029   |
| Nausea/vomiting  | 4.42                                                                      | (0.748,26.09) | 0.101   | 370.11                                                               | (2.71,50429.42) | 0.018   |
| Sore throat      | 0.36                                                                      | (0.067,1.93)  | 0.233   | 0.002                                                                | (0.000006,0.74) | 0.039   |
| Myalgia          | 1.15                                                                      | (0.24,5.51)   | 0.865   | 121.82                                                               | (1.52,9749.08)  | 0.032   |
| Breathlessness   | 6.90                                                                      | (0.96,49.40)  | 0.054   | 134.46                                                               | (1.02,17796.87) | 0.049   |
| Change in smell  | 0.77                                                                      | (0.098,6.15)  | 0.811   | 0.37                                                                 | (0.008,15.87)   | 0.607   |
| Fever            | 2.97                                                                      | (0.44,20.35)  | 0.266   | 1.44                                                                 | (0.057,36.66)   | 0.825   |
| Cough            | 0.12                                                                      | (0.014,1.03)  | 0.053   | 0.011                                                                | (0.00008,1.42)  | 0.069   |

**Caption to Table 2:** Symptoms associated with confirmed SARS-CoV-2 infection (antibody confirmed positive, irrespective of RT-qPCR result) among 22 patients, and with acute infection (RT-qPCR reactive, antibody confirmed positive) among 15 patients respectively.

### Regression analysis on acute disease

All 15 patients with acute disease reported fatigue and therefore this covariate was removed from the analysis; and observations from two patients with non-reactive RT-qPCR, who did not report fatigue, were also removed (Table 2). The multivariate logistic regression on the remaining 66 patients showed that the following covariates were associated with acute disease: loss of taste (OR=571.72; p=0.029), nausea and vomiting (OR=370.11; p=0.018), breathlessness (OR=134.46; p=0.049), myalgia (OR=121.82; p=0.032) and sore throat (OR=0.002, p=0.039); and but not loss of smell (OR=0.37, p=0.607), fever (OR=1.44, p=0.825) or cough (OR=0.01, p=0.069).

### Correlation between acute and confirmed infection

Testing RT-qPCR reactive was correlated with testing seropositive for COVID-19 infection ( $r=0.77$ , 95%CI 0.65~0.89). Among early and acute presenters, the correlation between the two tests was perfect (green and amber in Figure 2D), irrespective of the stage of the outbreak; whereas in the second half of the outbreak, RT-qPCR did not detect any case with convalescent infection (red curve on Figure 2D).

329

330 **Viral clade analysis**

331 Thirteen of 15 full-length genome sequences were available for clade analysis via GISAID (Table 3); and two  
 332 sequences were not available at the time of analysis. Lineages of SARS-CoV-2 have been identified based on  
 333 mutations in key amino acid positions.<sup>28</sup> Clade G is defined by the mutations S-D614G, C241T, C3037T and  
 334 A23403G in the Spike protein; and clade GR by additional RG203KR mutations in the Nucleocapsid protein N;  
 335 clade L is most closely related to the Wuhan reference strain (NC\_045512.2).<sup>29</sup> Accordingly, among the 13 viral  
 336 isolates, three different clades were identified, including clade L (N=2), GR (N=4) and L (N=7).

337 **Table 3: Genomic sequences accessed via GISAID listing key amino acid locations used for SARS-CoV-2**  
 338 **classification.**

| Disease Classification | Virus Name (GISAID)           | EPI_ISL_# | Date of RT-qPCR | Lineage    | ORF 8: 84 | ORF3a: 57 | S:614* | N:203** | N:204** |
|------------------------|-------------------------------|-----------|-----------------|------------|-----------|-----------|--------|---------|---------|
| Early acute            | hCoV-19/Austria/CeMM0191/2020 | 438032    | 13/03/2020      | B(L)       | L         | Q         | D      | R       | G       |
| Early acute            | hCoV-19/Austria/CeMM0248/2020 | 438078    | 21/03/2020      | B (L)      | L         | Q         | D      | R       | G       |
| Early acute            | hCoV-19/Austria/CeMM0018/2020 | 419671    | 19/03/2020      | B.1.1 (GR) | L         | Q         | G      | K       | R       |
| Early acute            | hCoV-19/Austria/CeMM0228/2020 | 438061    | 18/03/2020      | B.1.1 (GR) | L         | Q         | G      | K       | R       |
| Early acute            | hCoV-19/Austria/CeMM0235/2020 | 438066    | 19/03/2020      | B.1.1 (GR) | L         | Q         | G      | K       | R       |
| Early acute            | hCoV-19/Austria/CeMM0250/2020 | 438080    | 21/03/2020      | B.1.1 (GR) | L         | Q         | G      | K       | R       |
| Early acute            | hCoV-19/Austria/CeMM0222/2020 | 438056    | 17/03/2020      | B.1.8 (G)  | L         | Q         | G      | R       | G       |
| Early acute            | hCoV-19/Austria/CeMM0249/2020 | 438079    | 21/03/2020      | B.1.8 (G)  | L         | Q         | G      | R       | G       |
| Late acute             | hCoV-19/Austria/CeMM0267/2020 | 438096    | 24/03/2020      | B.1.8 (G)  | L         | Q         | G      | R       | G       |
| Late acute             | hCoV-19/Austria/CeMM0276/2020 | 438103    | 25/03/2020      | B.1.8 (G)  | L         | Q         | G      | R       | G       |
| Late acute             | hCoV-19/Austria/CeMM0303/2020 | 475778    | 29/03/2020      | B.1.8 (G)  | L         | Q         | G      | R       | G       |
| Late acute             | hCoV-19/Austria/CeMM0324/2020 | 475794    | 01/04/2020      | B.1.8 (G)  | L         | Q         | G      | R       | G       |
| Late acute             | hCoV-19/Austria/CeMM0337/2020 | 475800    | 03/04/2020      | B.1.8 (G)  | L         | Q         | G      | R       | G       |

339 **Caption Table 3:** SARS-CoV-2 clades are classified by The Global Initiative on Sharing All Influenza Data  
 340 (GISAID) using specific non-synonymous mutations in the viral genome. Clade G is defined by the mutations  
 341 D614G, C241T, C3037T and A23403G in the Spike protein; and clade GR by additional RG203KR mutations in  
 342 the Nucleocapsid protein N; clade L is most closely related to the Wuhan reference strain (NC\_045512.2).<sup>29</sup> Whole  
 343 genome data were available for 13/15 sequences; data for two sequences were not available at the time of analysis.  
 344 Accordingly, among the 13 sequences analysed, three different clades were identified, including clades L (N=2),  
 345 GR (N=4) and G (N=7). All three clades were detected in early acute infection, and clade G was additionally  
 346 detected in late acute infection. \*For simplicity reasons, only mutation D614G (grey background) in the Spike  
 347 protein defining clade G is shown. \*\*Additional mutations R203K and G204R in the Nucleocapsid protein N  
 348 defining clade GR are also shown in grey. ORF, open reading frame.

349

350 **DISCUSSION**

351 Our results demonstrate that SARS-CoV-2 RT-qPCR testing, when added to a national influenza surveillance  
 352 programme in primary care, can rapidly, early and accurately diagnose COVID-19 during an outbreak. Of the 73

1  
2  
3 353 patients presenting to the sentinel GP, 22 were diagnosed with COVID-19, including 15 patients with acute  
4 354 disease and 7 with late convalescent infection respectively. The sensitivity and specificity of RT-qPCR were  
5 355 68.1% and 100%, but testing RT-qPCR reactive showed perfect correlation with seropositivity during the first  
6 356 half of the outbreak and among early acute (N=8 patients) and late acute presenters (N=7). Strikingly, the mean  
7 357 duration of symptoms of early presenters (2 days) was less than half of late acute presenters (4.4 days) and a  
8 358 quarter of late convalescent presenters (8 days). These findings highlight the need to undertake RT-qPCR testing  
9 359 rapidly and early as soon as symptoms occur. Acute infection was strongly associated with multiple symptoms,  
10 360 including loss of taste, nausea and vomiting, breathlessness, myalgia and sore throat; but loss of smell, fever and  
11 361 cough were not. Surprisingly, loss of taste, but not any other clinical symptom, was significantly associated with  
12 362 convalescent infection. Finally, viral genome analysis demonstrated the presence of three major SARS-CoV-2  
13 363 clades during the outbreak, suggesting that the outbreak was the result of independent transmission chains.  
14  
15  
16  
17  
18  
19

20 365 Overall our findings help untangle COVID-19 infection during an outbreak in a ski-resort in Austria. Our results  
21 366 suggest that acute COVID-19 may be associated with a spectrum of symptoms and presence of multiple strains  
22 367 within one setting. This highlights the heterogeneity of coronavirus and the importance in containing outbreaks  
23 368 early before spread. While effective test-trace-isolate (TTI) strategies have been suggested as the key to containing  
24 369 the outbreak without intermittent lockdowns,<sup>30</sup> we suggest that systemic changes may also be needed. For  
25 370 example, behavioral changes, such as large-scale gathering of people in closed spaces has to be avoided as they  
26 371 may trigger emergence of individual clusters to form a superspreading event. Keeping a level of compliance to  
27 372 social distancing and reduced physical contacts is necessary as we move away from the first and potentially  
28 373 towards the second COVID-19 wave. Enhanced testing is an important factor, and our study suggests that testing  
29 374 in primary care at symptom onset is highly accurate and should be something that governments should consider  
30 375 as an additional strategy.  
31  
32  
33  
34  
35  
36  
37

38 377 Loss of taste of smell has been recognised as an important marker of COVID-19;<sup>1</sup> however, more than half of  
39 378 patients reported olfactory dysfunction after the onset of other symptoms when sensitivity of RT-qPCR may be  
40 379 reduced.<sup>31</sup> Furthermore, loss of taste could not be objectively confirmed in one third of people<sup>31</sup> suggesting self-  
41 380 assessment using a mobile phone application may not be as accurate as clinician-initiated RT-qPCR testing of  
42 381 people presenting with acute disease.<sup>32</sup> Timely and accurate testing is also a prerequisite for effective contact  
43 382 tracing.<sup>23</sup>  
44  
45  
46  
47  
48

49 384 The outbreak we explored occurred after a three-day party (March 13-15) just before the skiing season was  
50 385 brought to a premature end due to the Austrian national lockdown measures on March 16. The index case was  
51 386 diagnosed on March 11 and the first secondary cases were reported two days after the celebrations. Therefore, it  
52 387 is possible that the outbreak we are describing here could be a possible superspreading event. Superspreading  
53 388 events have been associated with high intensity aerosol producing activities (shouting, singing) in confined spaces  
54 389 and potentially, the lockdown party might have triggered the local outbreak. The two acute disease clusters  
55 390 observed in this study may represent different types of viral exposure. First, inhalation of high density aerosols at  
56 391 the party causing acute illness among early presenters and second, low level home transmission of party goers to  
57 392 (late presenting) friends and family during the lockdown. No further endemic cases were detected after the  
58  
59  
60



1  
2  
3 393 outbreak. This suggests that combination prevention including rapid testing and case notification in primary care,  
4 394 contact tracing and isolation, and lockdown measures can effectively terminate an outbreak. To our knowledge,  
5 395 our study is the first to demonstrate that the ECDC policy of additional COVID-19 screening at national influenza  
6 396 screening sites can effectively detect and control a regional outbreak.<sup>18</sup>  
7  
8

9 397  
10  
11 398 Our study has many strengths. Our study was enabled by data from a well-established sentinel GP, participating  
12 399 in the National Influenza Screening Programme, covering the entire area of the outbreak. Importantly, national  
13 400 SARS-CoV-2 screening was adopted early, starting the day before the first two cases were reported in Austria;  
14 401 and 16 of 29 cases documented in the Schladming-Dachstein region, including the first and the last case, were  
15 402 detected at the sentinel GP. RT-qPCR testing was rapidly deployed by offering same day GP appointments, and  
16 403 result reporting and case notification within 24 hours. Rapid adoption of new commercial antibody platforms (Lab  
17 404 Mustafa, Salzburg) and in-house neutralising antibody testing assay (Medical University of Vienna) enabled  
18 405 accurate interpretation of RT-qPCR results.  
19  
20  
21  
22

23 406  
24  
25 407 There are some limitations of our study. We used a relatively small patient cohort from a single sentinel GP,  
26 408 potentially limiting conclusions on causality and generalisability of our finding to other areas excluding seven  
27 409 patients for whom COVID-19 serostatus were not available. Lack of association with high fever and cough in our  
28 410 COVID-19 cohort may be due to the national health hotline directing patients with more severe disease to attend  
29 411 emergency service. Therefore, people with these symptoms might have preferred to attend acute services rather  
30 412 than the GP. Although we collected data prospectively, recall bias cannot be excluded. This could be suggested  
31 413 by the lack of association of symptoms of acute infection (nausea and vomiting, breathless and myalgia) among  
32 414 all people confirmed with infection (when including those with negative RT-qPCR), compared to those people  
33 415 presenting early (reactive RT-qPCR). Specific recall bias of taste is less likely, as it featured in both groups and  
34 416 data collection was completed prior to publication of the first systematic review of altered taste and smell in the  
35 417 media.<sup>33</sup> The presence of three viral clades within the outbreak suggests heterogeneity of the virus, but we have  
36 418 not explored this aspect in great details in this study, as this was beyond the scope of this work. In fact, the data  
37 419 presented here is part of the ongoing work untangling the phylogeny of SARS-CoV-2 clades in Austria and their  
38 420 worldwide spread.<sup>13</sup>  
39  
40  
41  
42  
43  
44  
45

46 421  
47  
48 422 To our knowledge, this is the first study to show that primary care can contribute to early case detection and  
49 423 termination of a SARS-CoV-2 outbreak in the community. Our study has important implications for patients,  
50 424 public health, and health systems; nationally and internationally for outbreak epidemiology and control. As  
51 425 countries enter the viral suppression phase, early detection will be crucial in the prevention and control of the  
52 426 disease. Early testing at onset of disease, followed by timely contact tracing and case isolation of secondary cases  
53 427 should prevent onward transmission and reduce the reproduction number  $R_e$  below 1. Austria has increased the  
54 428 number of its sentinel sites from 91 to 231 due to COVID-19, indicating that primary care has become an essential  
55 429 partner in a comprehensive surveillance strategy for disease prevention and control. Clade analysis could greatly  
56 430 enhance public health surveillance in the UK where only three quarters of contact tracing is being completed.<sup>34</sup>  
57  
58  
59  
60

1  
2  
3 431 Key priorities for future research include systematic prospective quantitative and qualitative evaluation of the  
4 432 Austrian National SARS-CoV-2 screening programme during the seasonal influenza season, and generalisability  
5 433 of the intervention in multi-ethnic inner-city settings including genomic analysis using deep viral genome  
6 434 sequencing to support complex contact tracing.  
7  
8

9 435

## 11 436 **CONCLUSIONS**

13 437 RT-qPCR testing in primary care can rapidly and accurately detect SARS-CoV-2 among people presenting with  
14 438 mild-to-moderate illness in a heterogenous viral community outbreak. This study demonstrates high rates of  
15 439 accurate and early viral detection associated with symptomatic testing in primary care during a COVID-19  
16 440 outbreak, which is required for an effective TTI strategy. Targeted testing in primary care can support national  
17 441 sentinel surveillance of coronavirus.  
18  
19

20 442

22 443 **Authors' Contributions:** WL, OL, MRF, MEMK, EMH, CH and JPG contributed to the design of the study.  
23 444 OL and EMH took nasopharyngeal swabs. OL, EMH and CH maintained the clinical data base. AS and RG  
24 445 submitted the ethics application. MRF provided RT-qPCR data; BA, AL, AMP, JWG, TP, SA, CB and AB; and  
25 446 JVC conducted clade analysis, MEMK produced ELISA data, KS performed the neutralising antibody assay.  
26 447 JPG and WL conducted the statistical analysis. WL and JPG wrote the manuscript with contributions from OL,  
27 448 MRF, MEMK, RCG, JVC, CB, AB, KS, EMH, CH, AS and CG. All authors read and approved the final  
28 449 version.  
29  
30

31 450 **Acknowledgments:** We thank Evelyn Marktl for daily updates on the Christian Drosten's COVID-19 podcast  
32 451 (<https://www.ndr.de/nachrichten/info/podcast4684.html>). We are grateful to the team of Praxis Dr Lammel for  
33 452 their contributions, and in particular to the nurse Sabine Roiederer for providing direct patient care and help with  
34 453 administration. We thank the patients of Schladming-Dachstein for participating in the study.  
35  
36

37 454 **Funding:** This research was self-funded by each individual co-author. This project received funding from the  
38 455 Vienna Science and Technology Fund (WWTF) as part of the WWTF COVID-19 Rapid Response Funding  
39 456 2020. Award/Grant number is not applicable.  
40  
41

42 457 **Ethics approval:** The study used secondary anonymised data for which approval was granted by the University  
43 458 of Graz Research Ethics Committee, Austria (reference number: 32-429 ex 19/20).  
44  
45

46 459 **Patient consent for publication:** Consent may not be required as no identifiable details on individuals are  
47 460 reported in this manuscript.  
48  
49

50 461 **Patient and public involvement:** No patient involvement.  
51  
52

53 462 **Data availability statement:** The datasets used and/or analysed during the current study are available from the  
54 463 corresponding author on reasonable request.  
55  
56

56 464 **Competing Interests:** None declared.  
57  
58

58 465  
59  
60

466 **References**

- 467 1. World Health Organisation (WHO). Clinical management of severe acute respiratory infection when  
468 COVID-19 is suspected. 2020. [https://www.who.int/publications-detail/clinical-management-of-severe-](https://www.who.int/publications-detail/clinical-management-of-severe-acute-respiratory-infection-when-novel-coronavirus-(ncov)-infection-is-suspected)  
469 [acute-respiratory-infection-when-novel-coronavirus-\(ncov\)-infection-is-suspected](https://www.who.int/publications-detail/clinical-management-of-severe-acute-respiratory-infection-when-novel-coronavirus-(ncov)-infection-is-suspected) (accessed July 02,  
470 2020).
- 471 2. Lauer SA, Grantz KH, Bi Q, et al. The Incubation Period of Coronavirus Disease 2019 (COVID-19) From  
472 Publicly Reported Confirmed Cases: Estimation and Application. *Ann Intern Med* 2020; 172(9): 577-82.
- 473 3. Cheng HY, Jian SW, Liu DP, et al. Contact Tracing Assessment of COVID-19 Transmission Dynamics in  
474 Taiwan and Risk at Different Exposure Periods Before and After Symptom Onset. *JAMA Intern Med* 2020.
- 475 4. Kimball A, Hatfield KM, Arons M, et al. Asymptomatic and Presymptomatic SARS-CoV-2 Infections in  
476 Residents of a Long-Term Care Skilled Nursing Facility - King County, Washington, March 2020. *MMWR*  
477 *Morb Mortal Wkly Rep* 2020; 69(13): 377-81.
- 478 5. Bullard J, Dust K, Funk D, et al. Predicting infectious SARS-CoV-2 from diagnostic samples. *Clin Infect*  
479 *Dis* 2020.
- 480 6. Wölfel R, Corman VM, Guggemos W, et al. Virological assessment of hospitalized patients with COVID-  
481 2019. *Nature* 2020; 581(7809): 465-9.
- 482 7. Endo A, Abbott S, Kucharski AJ, et al. Estimating the overdispersion in COVID-19 transmission using  
483 outbreak sizes outside China. *Wellcome Open Res* 2020; 5: 67.
- 484 8. Li R, Pei S, Chen B, et al. Substantial undocumented infection facilitates the rapid dissemination of novel  
485 coronavirus (SARS-CoV-2). *Science* 2020; 368(6490): 489-93.
- 486 9. European Centre for Disease Control and Prevention (ECDC). Rapid Risk Assessment: Coronavirus  
487 disease 2019 (COVID-19) in the EU/EEA and the UK– ninth update. 2020.  
488 [https://www.ecdc.europa.eu/en/publications-data/rapid-risk-assessment-coronavirus-disease-2019-covid-](https://www.ecdc.europa.eu/en/publications-data/rapid-risk-assessment-coronavirus-disease-2019-covid-19-pandemic-ninth-update)  
489 [19-pandemic-ninth-update](https://www.ecdc.europa.eu/en/publications-data/rapid-risk-assessment-coronavirus-disease-2019-covid-19-pandemic-ninth-update) (accessed July 02, 2020).
- 490 10. Koo JR, Cook AR, Park M, et al. Interventions to mitigate early spread of SARS-CoV-2 in Singapore: a  
491 modelling study. *Lancet Infect Dis* 2020.
- 492 11. Frieden TR, Lee CT. Identifying and Interrupting Superspreading Events-Implications for Control of  
493 Severe Acute Respiratory Syndrome Coronavirus 2. *Emerg Infect Dis* 2020; 26(6): 1059-66.
- 494 12. Kreidl P, Schmid D, Maritschnik S, et al. Emergence of coronavirus disease 2019 (COVID-19) in Austria.  
495 *Wien Klin Wochenschr* 2020: 1-8.
- 496 13. Popa A, Genger J-W, Nicholson M, et al. Mutational dynamics and transmission properties of SARS-CoV-  
497 2 superspreading events in Austria. *bioRxiv* 2020: 2020.07.15.204339.
- 498 14. Independent T. [https://www.independent.co.uk/news/world/europe/coronavirus-austria-cases-covid-19-](https://www.independent.co.uk/news/world/europe/coronavirus-austria-cases-covid-19-hospital-lockdown-latest-a9466281.html)  
499 [hospital-lockdown-latest-a9466281.html](https://www.independent.co.uk/news/world/europe/coronavirus-austria-cases-covid-19-hospital-lockdown-latest-a9466281.html). 2020.(Accessed September 05, 2020)

- 1  
2  
3 500 15. (European Centre for Disease Control and Prevention (ECDC). Coronavirus disease 2019 (COVID-19) in  
4 501 the EU/EEA and the UK –ninth update, 2020.  
5 502 [https://www.ecdc.europa.eu/sites/default/files/documents/covid-19-rapid-risk-assessment-coronavirus-](https://www.ecdc.europa.eu/sites/default/files/documents/covid-19-rapid-risk-assessment-coronavirus-disease-2019-ninth-update-23-april-2020.pdf)  
6 503 [disease-2019-ninth-update-23-april-2020.pdf](https://www.ecdc.europa.eu/sites/default/files/documents/covid-19-rapid-risk-assessment-coronavirus-disease-2019-ninth-update-23-april-2020.pdf) (Accessed July 02, 2020)  
7  
8  
9 504 16. de Sutter A, Llor C, Maier M, et al. Family medicine in times of 'COVID-19': A generalists' voice. *Eur J*  
10 505 *Gen Pract* 2020; 26(1): 58-60.  
11  
12 506 17. Hull SA, Williams C, Ashworth M, et al. Suspected COVID-19 in primary care: how GP records  
13 507 contribute to understanding differences in prevalence by ethnicity. *medRxiv* 2020: 2020.05.23.20101741.  
14  
15 508 18. European Centres for Disease Control (ECDC). Strategies for the surveillance of COVID-19, 2020.  
16 509 [https://www.ecdc.europa.eu/sites/default/files/documents/COVID-19-surveillance-strategy-9-Apr-](https://www.ecdc.europa.eu/sites/default/files/documents/COVID-19-surveillance-strategy-9-Apr-2020.pdf)  
17 510 [2020.pdf](https://www.ecdc.europa.eu/sites/default/files/documents/COVID-19-surveillance-strategy-9-Apr-2020.pdf) (accessed July 11, 2020).  
18  
19 511 19. de Lusignan S, Dorward J, Correa A, et al. Risk factors for SARS-CoV-2 among patients in the Oxford  
20 512 Royal College of General Practitioners Research and Surveillance Centre primary care network: a cross-  
21 513 sectional study. *Lancet Infect Dis* 2020.  
22  
23 514 20. Zentrum für Virologie Medizinische Universität Wien. Projekt Diagnostisches Influenzanezwerk  
24 515 Österreich (DINÖ). [https://www.virologie.meduniwien.ac.at/wissenschaft-forschung/virus-](https://www.virologie.meduniwien.ac.at/wissenschaft-forschung/virus-epidemiologie/influenza-projekt-diagnostisches-influenzanezwerk-oesterreich-dinoe/)  
25 516 [epidemiologie/influenza-projekt-diagnostisches-influenzanezwerk-oesterreich-dinoe/](https://www.virologie.meduniwien.ac.at/wissenschaft-forschung/virus-epidemiologie/influenza-projekt-diagnostisches-influenzanezwerk-oesterreich-dinoe/) (Accessed July 02,  
26 517 2020).  
27  
28 518 21. Federal Ministry of Social Affairs H, Care and Consumer Protection, Republic of Austria. National Health  
29 519 Hotline 1450. 2019. <https://www.1450.at/1450-die-gesundheitsnummer/> (accessed May 28, 2020).  
30  
31 520 22. Corman V, Bleicker T, Brünink S, et al. Diagnostic detection of 2019-nCoV by real-time RT-PCR.  
32 521 [https://www.who.int/docs/default-source/coronaviruse/protocol-v2-1.pdf?sfvrsn=a9ef618c\\_2](https://www.who.int/docs/default-source/coronaviruse/protocol-v2-1.pdf?sfvrsn=a9ef618c_2) (accessed  
33 522 September 29, 2020).  
34  
35 523 23. Kretzschmar ME, Rozhnova G, Bootsma MCJ, et al. Impact of delays on effectiveness of contact tracing  
36 524 strategies for COVID-19: a modelling study. *Lancet Public Health* 2020.  
37  
38 525 24. Stadlbauer D, Amanat F, Chromikova V, et al. SARS-CoV-2 Seroconversion in Humans: A Detailed  
39 526 Protocol for a Serological Assay, Antigen Production, and Test Setup. *Curr Protoc Microbiol* 2020; 57(1):  
40 527 e100.  
41  
42 528 25. Ahn JY, Sohn Y, Lee SH, et al. Use of Convalescent Plasma Therapy in Two COVID-19 Patients with  
43 529 Acute Respiratory Distress Syndrome in Korea. *J Korean Med Sci* 2020; 35(14): e149.  
44  
45 530 26. Pinnock H, Epiphaniou E, Sheikh A, et al. Developing standards for reporting implementation studies of  
46 531 complex interventions (StaRI): a systematic review and e-Delphi. *Implement Sci* 2015; 10(1): 42.  
47  
48 532 27. Shu Y, McCauley J. GISAID: Global initiative on sharing all influenza data - from vision to reality. *Euro*  
49 533 *Surveill* 2017; 22(13).  
50  
51 534 28. Mercatelli D, Giorgi FM. Geographic and Genomic Distribution of SARS-CoV-2 Mutations. *Front*  
52 535 *Microbiol* 2020; 11(1800).

- 1  
2  
3 536 29. Global Initiative on Sharing All Influenza Data (GISAIID). Clade and lineage nomenclature aids in  
4 537 genomic epidemiology studies of active hCoV-19 viruses. 2020.  
5 538 [https://www.gisaid.org/references/statements-clarifications/clade-and-lineage-nomenclature-aids-in-](https://www.gisaid.org/references/statements-clarifications/clade-and-lineage-nomenclature-aids-in-genomic-epidemiology-of-active-hcov-19-viruses/)  
6 539 [genomic-epidemiology-of-active-hcov-19-viruses/](https://www.gisaid.org/references/statements-clarifications/clade-and-lineage-nomenclature-aids-in-genomic-epidemiology-of-active-hcov-19-viruses/) (accessed September 05, 2020).  
7  
8  
9 540 30. Panovska-Griffiths J, Kerr CC, Stuart RM, et al. Determining the optimal strategy for reopening schools,  
10 541 the impact of test and trace interventions, and the risk of occurrence of a second COVID-19 epidemic  
11 542 wave in the UK: a modelling study. *Lancet Child Adolesc Health* 2020.  
12  
13  
14 543 31. Lechien JR, Chiesa-Estomba CM, Hans S, Barillari MR, Jouffe L, Saussez S. Loss of Smell and Taste in  
15 544 2013 European Patients With Mild to Moderate COVID-19. *Ann Intern Med* 2020.  
16  
17 545 32. Menni C, Valdes AM, Freidin MB, et al. Real-time tracking of self-reported symptoms to predict potential  
18 546 COVID-19. *Nat Med* 2020.  
19  
20 547 33. Lovato A, de Filippis C. Clinical Presentation of COVID-19: A Systematic Review Focusing on Upper  
21 548 Airway Symptoms. *Ear Nose Throat J* 2020: 145561320920762.  
22  
23 549 34. NHS England England. NHS Test and Trace – week 4 of contact tracing, England: 18 to 24 June 2020.  
24 550 2020. [https://www.gov.uk/government/publications/nhs-test-and-trace-statistics-england-18-june-to-24-](https://www.gov.uk/government/publications/nhs-test-and-trace-statistics-england-18-june-to-24-june-2020/weekly-nhs-test-and-trace-bulletin-england-18-24-june-2020)  
25 551 [june-2020/weekly-nhs-test-and-trace-bulletin-england-18-24-june-2020](https://www.gov.uk/government/publications/nhs-test-and-trace-statistics-england-18-june-to-24-june-2020/weekly-nhs-test-and-trace-bulletin-england-18-24-june-2020) (accessed September 09, 2020).  
26  
27  
28  
29  
30  
31  
32

### 554 FIGURE LEGENDS

33  
34  
35 555 Figure 1: Flow-chart. Twenty-two patients had COVID-19 infection confirmed by antibody testing, including 15  
36 556 patients diagnosed with acute disease (reactive RT-qPCR) and 7 with convalescent disease (non-reactive RT-  
37 557 qPCR); among the former, 9 patients tested concordant antibody positive and 6 patients tested neutralizing  
38 558 antibody positive following discordant ELISA result; and among the latter, 5 patients tested concordant  
39 559 antibody positive and 2 patients tested neutralizing antibody positive following discordant ELISA result. 44  
40 560 patients with non-reactive RT-qPCR tested antibody negative, including 41 with concordant negative ELISA, 1  
41 561 patient with negative neutralizing antibody after discordant ELISA result and 2 patients diagnosed with  
42 562 Influenza. Antibody status was not available for 7 patients. \*\*Final clinical diagnoses included infectious  
43 563 mononucleosis (N=2); bacterial tonsillitis, bacterial pneumonia, and bronchitis and exacerbation of COPD  
44 564 (N=1, each). \*\*\*No concordant negatives.  
45  
46  
47  
48  
49  
50  
51

51 566 Figure 2: (A) Cumulative COVID-19 diagnosis in the ski-resort Schladming-Dachstein over time. The main  
52 567 outbreak occurred after a three-day party event (March 13 to 15) celebrating the early termination of the skiing  
53 568 season due to National lockdown commencing on March 16. Between March 11 (index case) and April 03 (last  
54 569 endemic case), 8 people were diagnosed with acute infection (RT-qPCR-reactive, confirmed antibody positive)  
55 570 in the first half (12 days from March 11 to 22, 2020) of the outbreak (green colour), and 7 people with late acute  
56 571 infection (amber) and 7 people with convalescent infection (red) were detected during the second half; (B)

1  
2  
3 572 Cumulative weekly numbers of confirmed COVID-19 cases during the outbreak. RT-qPCR was 100% sensitive  
4 573 among all early acute and late acute presenters. RT-qPCR did not detect any of the late convalescent presenters;  
5 574 (C) Mean duration of symptoms; and (D): Mean number of symptoms.  
6  
7

8 575  
9  
10  
11  
12  
13  
14  
15  
16  
17  
18  
19  
20  
21  
22  
23  
24  
25  
26  
27  
28  
29  
30  
31  
32  
33  
34  
35  
36  
37  
38  
39  
40  
41  
42  
43  
44  
45  
46  
47  
48  
49  
50  
51  
52  
53  
54  
55  
56  
57  
58  
59  
60

For peer review only

1  
2  
3  
4  
5  
6  
7  
8  
9  
10  
11  
12  
13  
14  
15  
16  
17  
18  
19  
20  
21  
22  
23  
24  
25  
26  
27  
28  
29  
30  
31  
32  
33  
34  
35  
36  
37  
38  
39  
40  
41  
42  
43  
44  
45  
46

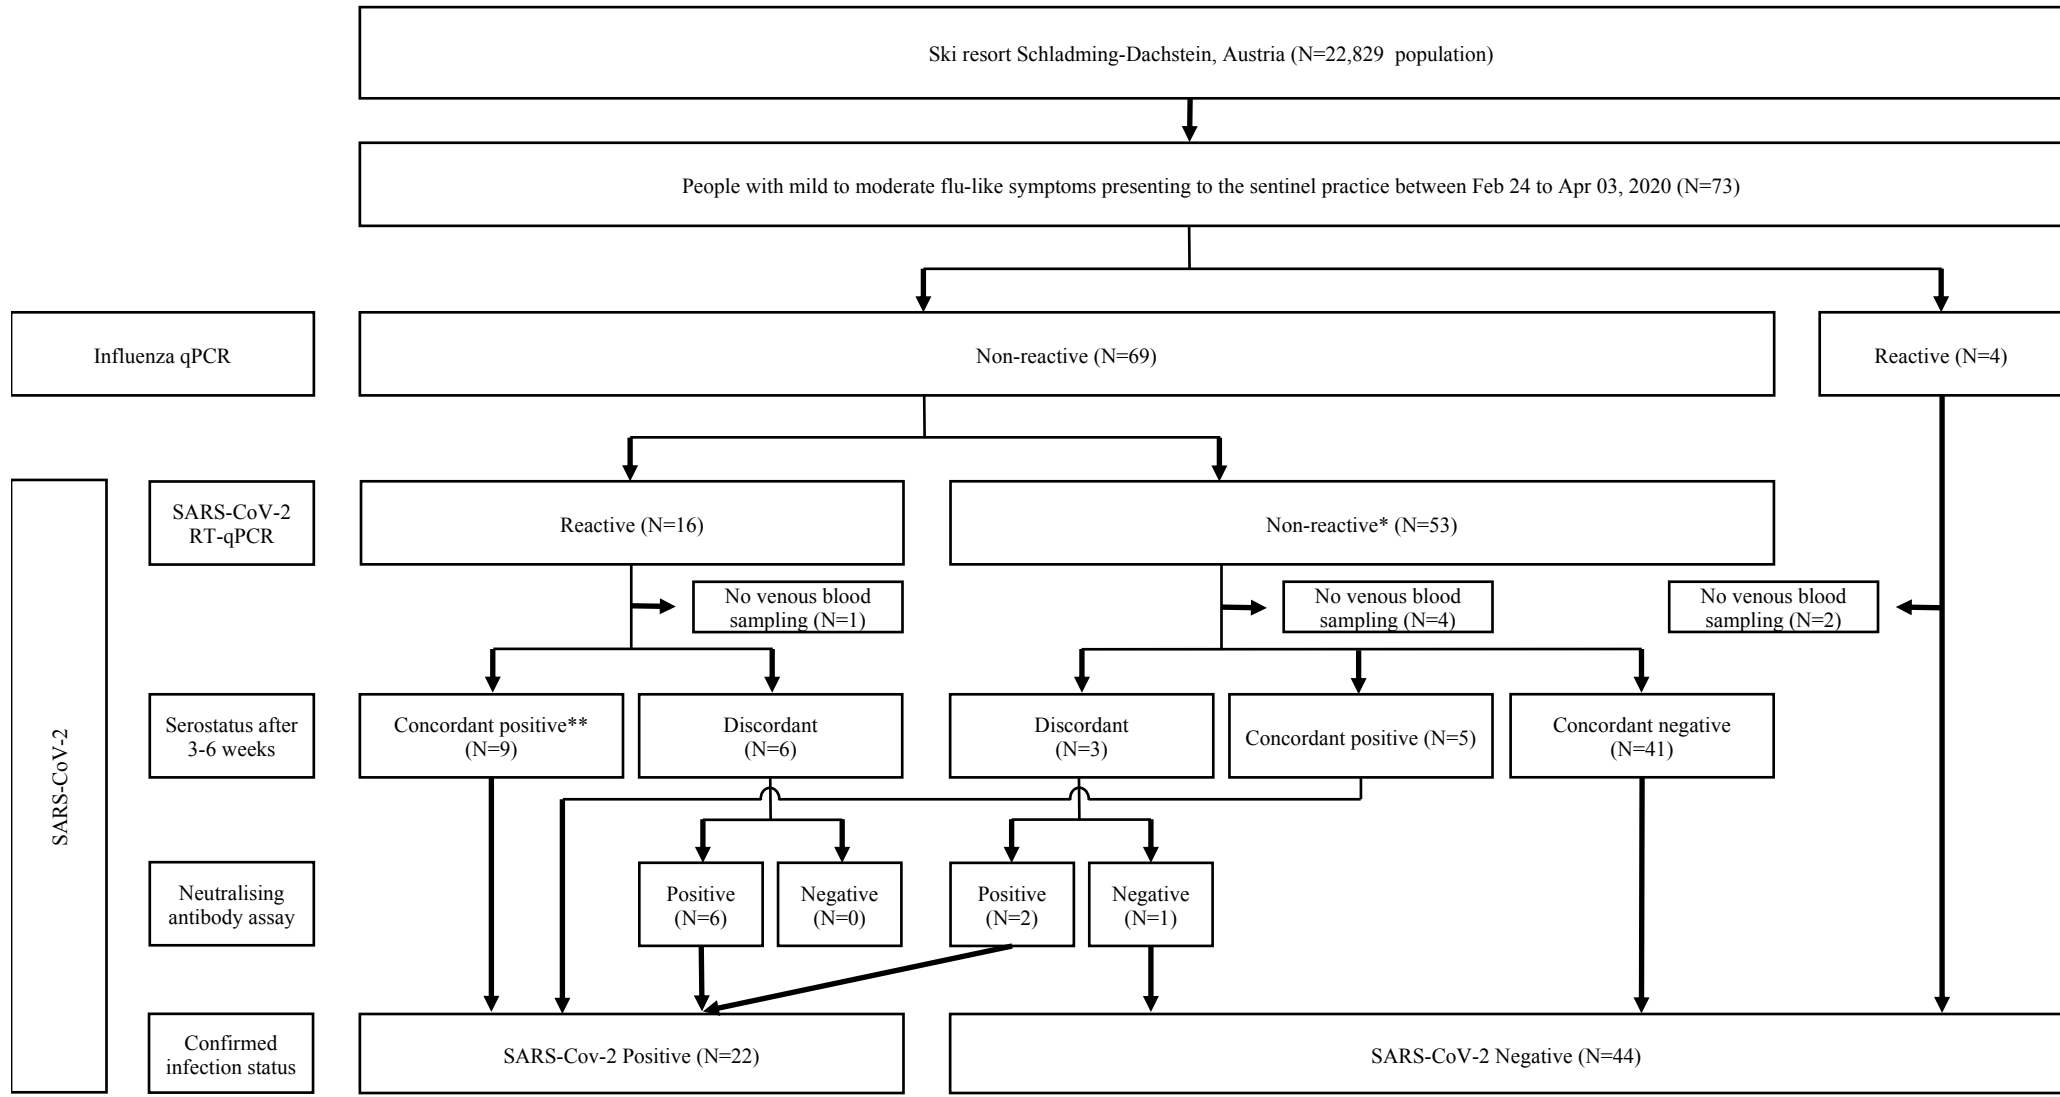

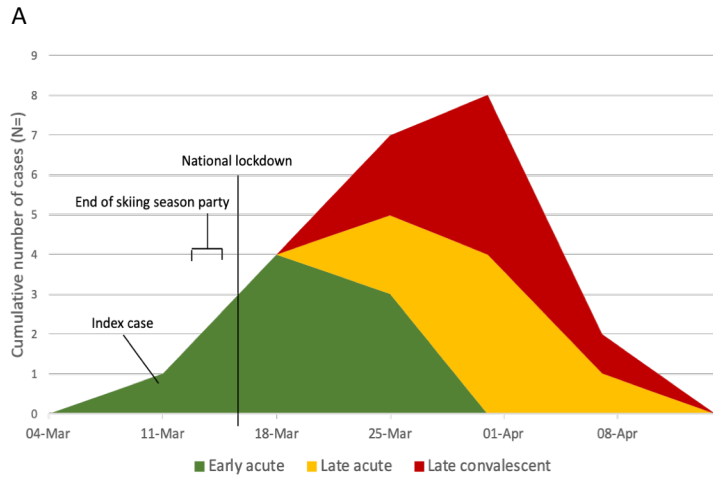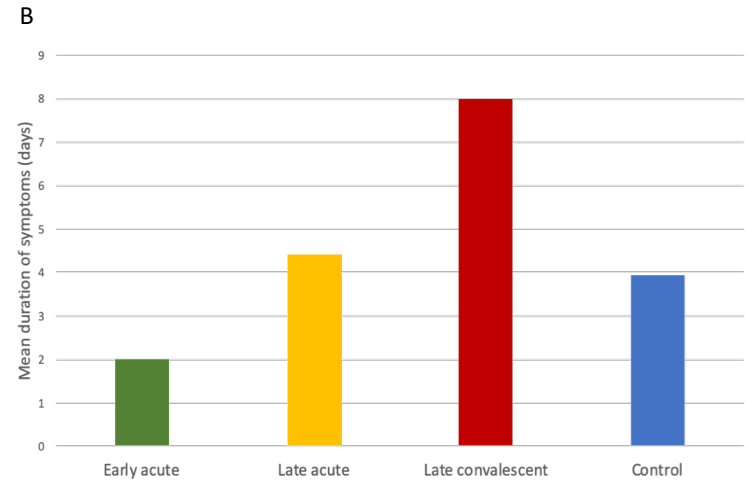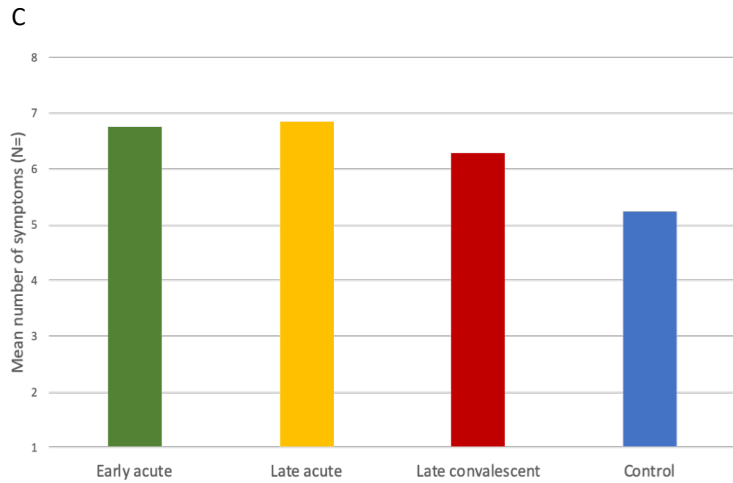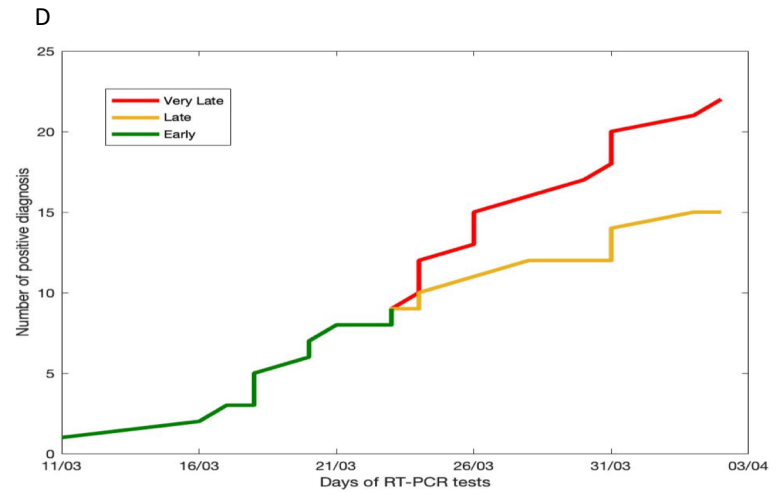



**STROBE 2007 (v4) Statement—Checklist of items that should be included in reports of *cohort studies***

| Section/Topic                | Item # | Recommendation                                                                                                                                                                       | Reported on page # |
|------------------------------|--------|--------------------------------------------------------------------------------------------------------------------------------------------------------------------------------------|--------------------|
| <b>Title and abstract</b>    | 1      | (a) Indicate the study's design with a commonly used term in the title or the abstract                                                                                               | 2                  |
|                              |        | (b) Provide in the abstract an informative and balanced summary of what was done and what was found                                                                                  | 2,3                |
| <b>Introduction</b>          |        |                                                                                                                                                                                      |                    |
| Background/rationale         | 2      | Explain the scientific background and rationale for the investigation being reported                                                                                                 | 3,4                |
| Objectives                   | 3      | State specific objectives, including any prespecified hypotheses                                                                                                                     | 4                  |
| <b>Methods</b>               |        |                                                                                                                                                                                      |                    |
| Study design                 | 4      | Present key elements of study design early in the paper                                                                                                                              | 5                  |
| Setting                      | 5      | Describe the setting, locations, and relevant dates, including periods of recruitment, exposure, follow-up, and data collection                                                      | 5                  |
| Participants                 | 6      | (a) Give the eligibility criteria, and the sources and methods of selection of participants. Describe methods of follow-up                                                           | 5                  |
|                              |        | (b) For matched studies, give matching criteria and number of exposed and unexposed                                                                                                  | NA                 |
| Variables                    | 7      | Clearly define all outcomes, exposures, predictors, potential confounders, and effect modifiers. Give diagnostic criteria, if applicable                                             | 6                  |
| Data sources/<br>measurement | 8*     | For each variable of interest, give sources of data and details of methods of assessment (measurement). Describe comparability of assessment methods if there is more than one group | 6,7                |
| Bias                         | 9      | Describe any efforts to address potential sources of bias                                                                                                                            | 6                  |
| Study size                   | 10     | Explain how the study size was arrived at                                                                                                                                            | 5                  |
| Quantitative variables       | 11     | Explain how quantitative variables were handled in the analyses. If applicable, describe which groupings were chosen and why                                                         | 5,6,7              |
| Statistical methods          | 12     | (a) Describe all statistical methods, including those used to control for confounding                                                                                                | 7,8                |
|                              |        | (b) Describe any methods used to examine subgroups and interactions                                                                                                                  | 7,8                |
|                              |        | (c) Explain how missing data were addressed                                                                                                                                          | 8                  |
|                              |        | (d) If applicable, explain how loss to follow-up was addressed                                                                                                                       | 8                  |
|                              |        | (e) Describe any sensitivity analyses                                                                                                                                                | NA                 |
| <b>Results</b>               |        |                                                                                                                                                                                      |                    |

|                          |     |                                                                                                                                                                                                              |       |
|--------------------------|-----|--------------------------------------------------------------------------------------------------------------------------------------------------------------------------------------------------------------|-------|
| Participants             | 13* | (a) Report numbers of individuals at each stage of study—eg numbers potentially eligible, examined for eligibility, confirmed eligible, included in the study, completing follow-up, and analysed            | 8     |
|                          |     | (b) Give reasons for non-participation at each stage                                                                                                                                                         | 8     |
|                          |     | (c) Consider use of a flow diagram                                                                                                                                                                           | 8     |
| Descriptive data         | 14* | (a) Give characteristics of study participants (eg demographic, clinical, social) and information on exposures and potential confounders                                                                     | 8     |
|                          |     | (b) Indicate number of participants with missing data for each variable of interest                                                                                                                          | 8     |
|                          |     | (c) Summarise follow-up time (eg, average and total amount)                                                                                                                                                  | 8     |
| Outcome data             | 15* | Report numbers of outcome events or summary measures over time                                                                                                                                               | 8     |
| Main results             | 16  | (a) Give unadjusted estimates and, if applicable, confounder-adjusted estimates and their precision (eg, 95% confidence interval). Make clear which confounders were adjusted for and why they were included | 9,10  |
|                          |     | (b) Report category boundaries when continuous variables were categorized                                                                                                                                    | NA    |
|                          |     | (c) If relevant, consider translating estimates of relative risk into absolute risk for a meaningful time period                                                                                             | NA    |
| Other analyses           | 17  | Report other analyses done—eg analyses of subgroups and interactions, and sensitivity analyses                                                                                                               | 9,11  |
| <b>Discussion</b>        |     |                                                                                                                                                                                                              |       |
| Key results              | 18  | Summarise key results with reference to study objectives                                                                                                                                                     | 11,12 |
| <b>Limitations</b>       |     |                                                                                                                                                                                                              |       |
| Interpretation           | 20  | Give a cautious overall interpretation of results considering objectives, limitations, multiplicity of analyses, results from similar studies, and other relevant evidence                                   | 12    |
| Generalisability         | 21  | Discuss the generalisability (external validity) of the study results                                                                                                                                        | 13    |
| <b>Other information</b> |     |                                                                                                                                                                                                              |       |
| Funding                  | 22  | Give the source of funding and the role of the funders for the present study and, if applicable, for the original study on which the present article is based                                                | 14    |

\*Give information separately for cases and controls in case-control studies and, if applicable, for exposed and unexposed groups in cohort and cross-sectional studies.

**Note:** An Explanation and Elaboration article discusses each checklist item and gives methodological background and published examples of transparent reporting. The STROBE checklist is best used in conjunction with this article (freely available on the Web sites of PLoS Medicine at <http://www.plosmedicine.org/>, Annals of Internal Medicine at <http://www.annals.org/>, and Epidemiology at <http://www.epidem.com/>). Information on the STROBE Initiative is available at [www.strobe-statement.org](http://www.strobe-statement.org).

# BMJ Open

## Rapid, early and accurate SARS-CoV-2 detection during a COVID-19 outbreak in Austria: Evidence of effective sentinel surveillance screening in primary care (REAP-1)

|                                 |                                                                                                                                                                                                                                                                                                                                                                                                                                                                                                                                                                                                                                                                                                                                                                                                                                                                                                                                                                                                                                                                                                                                                                                                                                                                                                                                                                                                                                                                                                                                                                                                                                                                                                                                                                                                                                                                                                           |
|---------------------------------|-----------------------------------------------------------------------------------------------------------------------------------------------------------------------------------------------------------------------------------------------------------------------------------------------------------------------------------------------------------------------------------------------------------------------------------------------------------------------------------------------------------------------------------------------------------------------------------------------------------------------------------------------------------------------------------------------------------------------------------------------------------------------------------------------------------------------------------------------------------------------------------------------------------------------------------------------------------------------------------------------------------------------------------------------------------------------------------------------------------------------------------------------------------------------------------------------------------------------------------------------------------------------------------------------------------------------------------------------------------------------------------------------------------------------------------------------------------------------------------------------------------------------------------------------------------------------------------------------------------------------------------------------------------------------------------------------------------------------------------------------------------------------------------------------------------------------------------------------------------------------------------------------------------|
| Journal:                        | <i>BMJ Open</i>                                                                                                                                                                                                                                                                                                                                                                                                                                                                                                                                                                                                                                                                                                                                                                                                                                                                                                                                                                                                                                                                                                                                                                                                                                                                                                                                                                                                                                                                                                                                                                                                                                                                                                                                                                                                                                                                                           |
| Manuscript ID                   | bmjopen-2020-045225.R1                                                                                                                                                                                                                                                                                                                                                                                                                                                                                                                                                                                                                                                                                                                                                                                                                                                                                                                                                                                                                                                                                                                                                                                                                                                                                                                                                                                                                                                                                                                                                                                                                                                                                                                                                                                                                                                                                    |
| Article Type:                   | Original research                                                                                                                                                                                                                                                                                                                                                                                                                                                                                                                                                                                                                                                                                                                                                                                                                                                                                                                                                                                                                                                                                                                                                                                                                                                                                                                                                                                                                                                                                                                                                                                                                                                                                                                                                                                                                                                                                         |
| Date Submitted by the Author:   | 27-Jan-2021                                                                                                                                                                                                                                                                                                                                                                                                                                                                                                                                                                                                                                                                                                                                                                                                                                                                                                                                                                                                                                                                                                                                                                                                                                                                                                                                                                                                                                                                                                                                                                                                                                                                                                                                                                                                                                                                                               |
| Complete List of Authors:       | <p>Leber, Werner; Queen Mary University of London, Centre for Primary Care and Public Health<br/> Lammel, Oliver; Praxis Dr Lammel<br/> Redlberger-Fritz, Monika; Medical University of Vienna<br/> Mustafa-Korninger, Maria Elisabeth; 4 Medizinisch-chemisches Labor Dr. Mustafa, Dr. Richter OG<br/> Glehr, Reingard Christina; Medical University of Graz<br/> Camp, Jeremy; Medical University of Vienna<br/> Agerer, Benedikt; Research Center for Molecular Medicine of the Austrian Academy of Sciences<br/> Lercher, Alexander; Research Center for Molecular Medicine of the Austrian Academy of Sciences<br/> Popa, Alexandra; Research Center for Molecular Medicine of the Austrian Academy of Sciences<br/> Genger, Jakob-Wendelin; Research Center for Molecular Medicine of the Austrian Academy of Sciences<br/> Penz, Thomas; Research Center for Molecular Medicine of the Austrian Academy of Sciences<br/> Aberle, Stephan; Medical University of Vienna<br/> Bock, Christoph; Research Center for Molecular Medicine of the Austrian Academy of Sciences<br/> Bergthaler, Andreas; Research Center for Molecular Medicine of the Austrian Academy of Sciences<br/> Stiasny, Karin; Medical University of Vienna<br/> Hochstrasser, Eva-Maria; Praxis Dr Lammel<br/> Hoellinger, Christian; Paracelsus Medical Private University<br/> Siebenhofer, Andrea; Institute of General Practice and Evidence-based Health Services Research, Medical University Graz; Institute for General Practice, Goethe University<br/> Griffiths, Chris; Barts and The London School of Medicine and Dentistry, Panovska-Griffiths, Jasmina; NIHR CLAHRC North Thames, Department of Applied Health Research, University College London, London, United Kingdom, ; Department of Global Health and Development, London School of Hygiene and Tropical Medicine, 15-17 Tavistock Place, WC1H 9SH,</p> |
| <b>Primary Subject Heading</b>: | General practice / Family practice                                                                                                                                                                                                                                                                                                                                                                                                                                                                                                                                                                                                                                                                                                                                                                                                                                                                                                                                                                                                                                                                                                                                                                                                                                                                                                                                                                                                                                                                                                                                                                                                                                                                                                                                                                                                                                                                        |

1  
2  
3  
4  
5  
6  
7  
8  
9  
10  
11  
12  
13  
14  
15  
16  
17  
18  
19  
20  
21  
22  
23  
24  
25  
26  
27  
28  
29  
30  
31  
32  
33  
34  
35  
36  
37  
38  
39  
40  
41  
42  
43  
44  
45  
46  
47  
48  
49  
50  
51  
52  
53  
54  
55  
56  
57  
58  
59  
60

|                            |                                                                       |
|----------------------------|-----------------------------------------------------------------------|
| Secondary Subject Heading: | Infectious diseases, Public health                                    |
| Keywords:                  | PRIMARY CARE, COVID-19, Public health < INFECTIOUS DISEASES, VIROLOGY |
|                            |                                                                       |

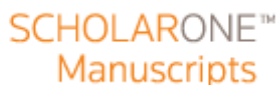

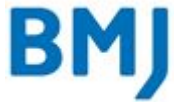

I, the Submitting Author has the right to grant and does grant on behalf of all authors of the Work (as defined in the below author licence), an exclusive licence and/or a non-exclusive licence for contributions from authors who are: i) UK Crown employees; ii) where BMJ has agreed a CC-BY licence shall apply, and/or iii) in accordance with the terms applicable for US Federal Government officers or employees acting as part of their official duties; on a worldwide, perpetual, irrevocable, royalty-free basis to BMJ Publishing Group Ltd ("BMJ") its licensees and where the relevant Journal is co-owned by BMJ to the co-owners of the Journal, to publish the Work in this journal and any other BMJ products and to exploit all rights, as set out in our [licence](#).

The Submitting Author accepts and understands that any supply made under these terms is made by BMJ to the Submitting Author unless you are acting as an employee on behalf of your employer or a postgraduate student of an affiliated institution which is paying any applicable article publishing charge ("APC") for Open Access articles. Where the Submitting Author wishes to make the Work available on an Open Access basis (and intends to pay the relevant APC), the terms of reuse of such Open Access shall be governed by a Creative Commons licence – details of these licences and which [Creative Commons](#) licence will apply to this Work are set out in our licence referred to above.

Other than as permitted in any relevant BMJ Author's Self Archiving Policies, I confirm this Work has not been accepted for publication elsewhere, is not being considered for publication elsewhere and does not duplicate material already published. I confirm all authors consent to publication of this Work and authorise the granting of this licence.

1  
2  
3  
4  
5  
6  
7  
8  
9  
10  
11  
12  
13  
14  
15  
16  
17  
18  
19  
20  
21  
22  
23  
24  
25  
26  
27  
28  
29  
30  
31  
32  
33  
34  
35  
36  
37  
38  
39  
40  
41  
42  
43  
44  
45  
46  
47  
48  
49  
50  
51  
52  
53  
54  
55  
56  
57  
58  
59  
60

1 Title: Rapid, early and accurate SARS-CoV-2 detection during a COVID-19 outbreak in  
2 Austria: Evidence of effective sentinel surveillance screening in primary care (REAP-1)

3  
4 Date: January 22, 2021

5  
6 Version: 2.0

7  
8 Co-authors

9  
10 Werner Leber<sup>1,\*,&</sup>

11 Oliver Lammel<sup>2</sup>

12 Monika Redlberger-Fritz<sup>3</sup>

13 Maria Elisabeth Mustafa-Korninger<sup>4</sup>

14 Reingard Christina Glehr<sup>5</sup>

15 Jeremy V. Camp<sup>3</sup>

16 Benedikt Agerer<sup>6</sup>

17 Alexander Lercher<sup>6</sup>

18 Alexandra M. Popa<sup>6</sup>

19 Jakob-Wendelin Genger<sup>6</sup>

20 Thomas Penz<sup>6</sup>

21 Stephan Aberle<sup>3</sup>

22 Christoph Bock<sup>6</sup>

23 Andreas Bergthaler<sup>6</sup>

24 Karin Stiasny<sup>3</sup>

25 Eva-Maria Hochstrasser<sup>2</sup>

26 Christian Hoellinger<sup>7</sup>

27 Andrea Siebenhofer<sup>5,8</sup>

28 Chris Griffiths<sup>1</sup>

29 Jasmina Panovska-Griffiths<sup>9,10,11,\*,&</sup>

For peer review only

1  
2  
3 31 <sup>1</sup> Centre for Clinical Effectiveness and Health Data Science, Institute of Population Health Sciences, Barts School  
4 32 of Medicine and Dentistry, Queen Mary University of London, London, UK

5  
6 33 <sup>2</sup> Practice Dr. Lammel, Ramsau am Dachstein, Austria

7  
8 34 <sup>3</sup> Center for Virology, Medical University of Vienna, Vienna, Austria

9  
10 35 <sup>4</sup> Medizinisch-chemisches Labor Dr. Mustafa, Dr. Richter OG, Salzburg, Austria

11  
12 36 <sup>5</sup> Institute of General Practice and Evidence-based Health Services Research, Medical University of Graz, Graz,  
13 37 Austria

14  
15 38 <sup>6</sup> CeMM Research Center for Molecular Medicine of the Austrian Academy of Sciences, Vienna, Austria

16  
17 39 <sup>7</sup> Paracelsus Medical University, Salzburg, Austria

18  
19 40 <sup>8</sup> Institute of General Practice, Goethe-University Frankfurt am Main, Frankfurt am Main, Germany

20  
21 41 <sup>9</sup> Department of Applied Health Care, Institute of Epidemiology & Health Care, University College London,  
22 42 London

23  
24 43 <sup>10</sup> Institute for Global Health, University College London, London, UK

25  
26 44 <sup>11</sup> The Queen's College, University of Oxford, Oxford, UK

27  
28 45  
29 46 & these authors contributed equally

30  
31 47 \* Corresponding authors: [w.leber@qmul.ac.uk](mailto:w.leber@qmul.ac.uk), [j.panovska-griffiths@ucl.ac.uk](mailto:j.panovska-griffiths@ucl.ac.uk)

32  
33 48  
34  
35  
36 49 **ABSTRACT**

37  
38 50 **Objectives:** We explore the importance of SARS-CoV-2 sentinel surveillance testing in primary care during a  
39 51 regional COVID-19 outbreak in Austria.

40  
41 52 **Design:** Prospective cohort study.

42  
43 53 **Setting:** A single sentinel practice serving 22,829 people in the ski-resort of Schladming-Dachstein.

44  
45 54 **Participants:** All 73 patients presenting with mild-to-moderate flu-like symptoms between 24 February and 03  
46 55 April, 2020.

47  
48 56 **Intervention:** Nasopharyngeal sampling to detect SARS-CoV-2 using real-time reverse transcriptase-polymerase  
49 57 chain reaction (RT-qPCR).

50  
51 58 **Outcome measures:** We compared RT-qPCR at presentation with confirmed antibody status. We split the  
52 59 outbreak in two parts, by halving the period from the first to the last case, to characterise three cohorts of patients  
53 60 with confirmed infection: early acute (RT-qPCR reactive) in the first half; and late acute (reactive) and late  
54 61 convalescent (non-reactive) in the second half. For each cohort we report the number of cases detected, the  
55 62 accuracy of RT-qPCR, the duration and variety of symptoms, and the number of viral clades present.

1  
2  
3 63 **Results:** Twenty-two patients were diagnosed with COVID-19 (8 early acute, 7 late acute and 7 late convalescent),  
4 64 44 patients tested SARS-CoV-2 negative, and 7 were excluded. The sensitivity of RT-qPCR was 100% among all  
5 65 acute cases, dropping to 68.1% when including convalescent. Test specificity was 100%. Mean duration of  
6 66 symptoms for each group were 2 days (range 1-4) among early acute, 4.4 days (1-7) among late acute and 8 days  
7 67 (2-12) among late convalescent. Confirmed infection was associated with loss of taste. Acute infection was  
8 68 associated with loss of taste, nausea/vomiting, breathlessness, sore throat and myalgia; but not anosmia, fever or  
9 69 cough. Transmission clusters of three viral clades (G, GR and L) were identified.

10 68  
11 68  
12 69  
13 70  
14 70 **Conclusions:** RT-qPCR testing in primary care can rapidly and accurately detect SARS-CoV-2 among people  
15 71 with flu-like illness in a heterogenous viral outbreak. Targeted testing in primary care can support national sentinel  
16 72 surveillance of coronavirus.  
17 72

18 73

#### 19 74 **Strengths and limitations of this study**

- 20 74
- 21 74
- 22 75 • Our study was conducted in a state-of-the-art sentinel surveillance practice, participating in the Austrian  
23 76 National Influenza Screening Programme, covering the entire period of a regional COVID-19 outbreak.
- 24 76
- 25 77 • Symptomatic patients received same-day appointments with a clinician for nasopharyngeal swabs, and people  
26 78 testing RT-qPCR reactive were notified within 24 hours.
- 27 78
- 28 79 • Cases were confirmed using a combination of five different ELISA platforms and neutralising antibody assay.
- 29 79
- 30 80 • The relatively small patient cohort from a single testing site limits conclusion on causality and generalisability.
- 31 80
- 32 81 • Any difference in symptoms observed between study cohorts may be due to recall bias occurred, particularly  
33 82 among those people presenting late.  
34 83

35 83

#### 36 84 **INTRODUCTION**

37 85 The coronavirus 2019 disease (COVID-19) pandemic, caused by severe acute respiratory syndrome coronavirus  
38 86 2 (SARS-CoV-2), continues to spread globally with more than 96 million cases, and over two million deaths  
39 86 reported as of January 22, 2021. Undetected infection and delays in implementing an effective test-trace-isolate  
40 87 (TTI) strategy have contributed to the spread of the virus becoming a pandemic. SARS-CoV-2 virus has a wide  
41 87 spectrum of manifestations including no symptoms (asymptomatic infection), mild to moderate to severe flu-like  
42 88 illness, loss of taste or smell, pneumonia and acute respiratory distress syndrome (ARDS), sepsis, multi-organ  
43 89 failure and death.<sup>1</sup> In studies to date, the reported time for the infection to become symptomatic (incubation period)  
44 89 varies among different cohorts and settings, with a median incubation period around 5.1 days,<sup>2</sup> infectivity starting  
45 90 2.3 days before symptom onset, peaking 1-2 days before that,<sup>3,4</sup> and gradually declining over 7-10 days.<sup>5,6 7</sup>  
46 90  
47 91  
48 92  
49 93

50 93

51 94

52 94

53 95 SARS-CoV-2 has the potential for ‘superspreading’ events, resulting in clusters of disease outbreaks among a  
54 96 large number of people. Most infections remain isolated cases, but a small number of individuals (10%) may  
55 96 cause up to 80% of secondary transmissions.<sup>8</sup> Although symptomatic infection is common (17 %, range 4-41%),  
56 97 the relative risk for symptomatic transmission may be up to six times higher than for asymptomatic infection.<sup>9-11</sup>  
57 98 Undocumented infection may constitute the majority of cases (86%), causing more than half (55%) of all  
58 99 documented infections.<sup>12</sup> Superspreading events have been reported from across the globe, and countries  
60 100



1  
2  
3 101 achieving early viral suppression took rapid and decisive action to implement comprehensive case identification  
4 102 and testing, combined with contact tracing and isolation.<sup>13,14</sup> For epidemic control of COVID-19, the effective  
5 103 reproduction number,  $R_e$ , needs to be less than 1; the presence of undetected and persistent infection within the  
6 104 population, even if very small, can increase  $R_e$  and induce a secondary peak of infections. Therefore, rapid  
7 105 identification and containment of infection is a key factor for the prevention of onward transmission and  
8 106 controlling the virus to protect the public.<sup>15</sup>  
9  
10  
11

107

12  
13  
14 108 In Austria, the first two COVID-19 cases were reported among travelers from Italy in the city of Innsbruck on  
15 109 February 25, 2020.<sup>16</sup> Multiple superspreading events then occurred among tourists visiting Austrian ski-resorts,  
16 110 including the town of Ischgl, that are believed to have led to further outbreaks in the tourists' home countries,  
17 111 including Germany, Denmark and Sweden.<sup>16,17</sup> Austria was one of the first countries to adopt comprehensive  
18 112 lockdown measures on March 16, 2020, including protection of vulnerable groups, penalty fees for breaching  
19 113 self-isolation, and a national health hotline to facilitate testing at acute care settings and *via* mobile units.<sup>18</sup> The  
20 114 first death from COVID-19 associated complications occurred on March 12, 2020, and as of January 21, 403.512  
21 115 cases and 7.389 COVID-19 related deaths have been reported.  
22  
23  
24  
25

116

26  
27  
28 117 General practice (GP) is considered a key partner in case recording, managing high-risk groups and delivery of  
29 118 equitable care.<sup>19-21</sup> The European Centre for Disease Prevention and Control (ECDC) recommended integration  
30 119 of "COVID-19 surveillance with sentinel surveillance of influenza-like illness or acute respiratory infection."<sup>22</sup>  
31 120 However, in some countries, like the UK and the USA, primary care has been largely excluded from the national  
32 121 TTI strategy.<sup>23</sup> In contrast, Austria additionally offered SARS-CoV-2 real-time reverse transcriptase-polymerase  
33 122 chain reaction (RT-qPCR) testing to people presenting with mild to moderate flu-like symptoms to any of the 92  
34 123 sentinel surveillance sites (GPs and paediatric practices) beginning February 24, 2020.<sup>24</sup> The new service  
35 124 supplemented the existing national health hotline for people at risk of COVID-19.<sup>25</sup> RT-qPCR is an established  
36 125 technique to detect viral RNA from nasopharyngeal sampling used to diagnose COVID-19.<sup>26</sup> Early detection of  
37 126 SARS-CoV-2 is essential for effective contact tracing,<sup>27</sup> and whole genome sequencing may provide data on  
38 127 dynamics of transmission.<sup>17,28</sup>  
39  
40  
41  
42  
43

128

44  
45  
46 129 The overall aim of this work is to test whether rapid early RT-qPCR testing in primary care can accurately and  
47 130 timely detect SARS-CoV-2, and inform outbreak surveillance. To attest this, we report the outcomes of SARS-  
48 131 CoV-2 RT-qPCR testing at a sentinel GP in the ski-resort of Schladming-Dachstein, Austria. We report a) the  
49 132 accuracy (via sensitivity and specificity) of rapidly deployed RT-qPCR testing in patients presenting with acute  
50 133 infection by comparing it to anti-SARS-CoV-2 antibody status during convalescence in the same geographically  
51 134 defined study cohort; b) the earliness of viral RNA detection by comparing the duration, number and type of  
52 135 symptoms among patients presenting during the first half (early presenters) and the second half (late presenters)  
53 136 of the outbreak, measured by the number of days from the first to the last case detected and dividing that period  
54 137 by two; c) the identification of key clinical symptoms of acute and convalescent disease and determine a  
55 138 correlation between these; and d) the number of SARS-CoV-2 clades implicated in the outbreak.  
56  
57  
58  
59  
60

139

## 140 METHODS

### 141 Setting

142 This study was set in a sentinel GP participating in the National Influenza Surveillance Network in the ski-resort  
143 of Schladming-Dachstein, political subdistrict of Groebming (population 22,829), Austria. The study was  
144 conducted during a local COVID-19 outbreak in March and April 2020, during which 29 cases were detected by  
145 RT-qPCR locally. The bulk of the outbreak occurred after a 3-day party (March 13-15) prior to implementation  
146 of the national lockdown policy on March 16, which led to premature termination of the skiing season. All patients  
147 presenting with mild to moderate flu-like illness were included. Following the report of the first cases in Austria,  
148 people with flu-like symptoms were advised to call the national health hotline instead of directly presenting to the  
149 hospital or GP. Patients were advised to phone the GP or receive in-home testing by mobile testing units, and  
150 home self-isolate and self-care. Asymptomatic people were excluded from this study.

151

### 152 Design

153 We conducted a longitudinal evaluation comprising a prospective cohort to examine the impact of SARS-Cov-2  
154 RT-qPCR testing on COVID-19 case detection. Between February 24 and April 03, 2020, RT-qPCR testing and  
155 seropositivity data were collected to compare two groups within this cohort of patients:

- 156 • Patients testing RT-qPCR reactive at presentation with acute disease
- 157 • Patients confirmed anti-SARS-CoV-2 antibody positive during the convalescence phase (confirmed infection).

158 We define acute disease as the presence of flu-like symptoms combined with reactive SARS-CoV-2 RT-qPCR  
159 and positive serostatus; and confirmed infection as the presence of convalescent anti-SARS-CoV-2 antibody 3-6  
160 weeks after the acute illness, irrespective of the RT-qPCR result.

161

### 162 Intervention

163 On February 24, 2020, one day before the first two cases were reported in Austria, the National Influenza  
164 Screening Network was enhanced to include SARS-CoV-2 RT-qPCR testing.

165 Patients with mild to moderate flu-like symptoms calling the study sentinel GP were offered same day  
166 appointments for SARS-CoV-2 RT-qPCR testing. RT-qPCR results were available within 24 hours, and those  
167 patients with a reactive outcome were immediately notified by a clinician and advised to self-isolate for a  
168 minimum of two weeks following national policy at that time. Repeat follow-up RT-qPCR was arranged by the  
169 local public health authority (District Commissioner of Liezen, Austria), and people testing non-reactive on repeat  
170 RT-qPCR were released from self-isolation. After 3-6 weeks, venous blood was obtained to confirm SARS-CoV-2  
171 infection using ELISA IgG and neutralizing antibody assay. We defined the period of the outbreak as the number  
172 of days from the first patient to the last patient testing RT-qPCR reactive at the GP.

173

1  
2  
3 174 Since the winter season 2000/2001, the National Influenza Screening Network has conducted influenza screening  
4 175 for patients attending sentinel GPs and paediatric practices. Between November and March of each year,  
5 176 participating practices routinely collect nasopharyngeal swabs from patients presenting with flu-like symptoms.  
6 177 Specimens are sent to the Center for Virology, Medical University of Vienna, Austria, for virus isolation on tissue  
7 178 cultures and PCR detection. This surveillance programme allows for near real-time recording of seasonal  
8 179 influenza virus activity in the country.

### 12 180 **Clinical data**

14 181 We obtained anonymous patient data held within the GP computer system. The practice lead clinician (OL)  
15 182 generated a clinical master case report form before extracting pseudonymised patient records into an Excel  
16 183 spreadsheet. EMH and CH verified the accuracy of the data extraction for all patients. Data were stored on a  
17 184 secure computer at the Institute of General Practice and Evidence-based Health Services Research, University of  
18 185 Graz, Austria, before sharing it with the study statistician (JPG) using encrypted email and secure storage at the  
19 186 University of Oxford, UK.

23 187

### 25 188 **Testing**

#### 27 189 RT-qPCR

28 190 SARS-CoV-2 RT-qPCR was performed in scope of the routine surveillance at the Center for Virology, Medical  
29 191 University of Vienna on a Roche LightCycler (<http://www.roche.com>; Switzerland) using a primer-set provided  
30 192 by TIB MOLBIOL (<https://www.tib-molbiol.com/>; Germany).<sup>26</sup> RT-qPCR targeting the E-gene was considered  
31 193 reactive at a cycle threshold (Ct) value of less than 40, and Ct values above 32 were confirmed by RNA-dependent  
32 194 RNA polymerase (RdRP) gene detection.

#### 36 195 Enzyme linked immune assays (ELISA)

37 196 IgG serostatus assays were performed according to the manufacturers' protocol using five different commercial  
38 197 test kits of Anti-SARS-CoV-2 IgG enzyme immune linked assays (ELISA) provided by the following companies:  
39 198 EUROIMMUN (EUROIMMUN Medizinische Labordiagnostika AG, [www.euroimmun.com](http://www.euroimmun.com)),<sup>29</sup> and EPITOPE  
40 199 DIAGNOSTICS (Immunodiagnostik AG [www.euroimmun.com](http://www.euroimmun.com)) respectively.<sup>30</sup> Reagent wells of the Anti-  
41 200 SARS-CoV-2 IgG ELISA are coated with recombinant antigen derived from the spike protein (S1 domain) of  
42 201 SARS-CoV-2. Reagent wells of the EDI<sup>TM</sup> Novel Coronavirus COVID-19 IgG ELISA are coated with COVID-  
43 202 19 recombinant full length nucleocapsid protein. ABBOTT performed on the Architect platform (ABBOTT  
44 203 LABORATORIES INC., [www.abbott.com](http://www.abbott.com)), DIASORIN (DIASORIN S.p.A, <https://www.diasorin.com/home>)  
45 204 performed on the LIAISON® platform and ROCHE performed on the cobas e 801 analyzer. The Abbott SARS-  
46 205 CoV-2 IgG assay is a chemiluminescent microparticle immunoassay (CMIA) for the qualitative detection of IgG  
47 206 against a recombinant SARS-CoV-2 nucleoprotein. Results are reported in form of an index value (S/C).  
48 207 LIAISON® SARS-CoV-2 S1/S2 IgG assay is a chemiluminescence immunoassay (CLIA) for the quantitative  
49 208 detection of IgG against the recombinant S1 and S2 domain of the spike protein. Results are reported in arbitrary  
50 209 units (AU/mL). Elecsys® Anti-SARS-CoV-2 assay (Roche Diagnostics) is a electrochemiluminescence  
51 210 immunoassay (ECLIA) for qualitative detection of SARS-CoV-2 antibodies in human serum against a  
52 211 recombinant nucleocapsid protein of SARS-CoV-2. It is a total antibody assay not differentiating between IgA,

212 IgM or IgG but detecting IgG predominantly. Results are reported as numeric values in form of signal  
213 sample/cutoff (COI).

214 Neutralising antibody assay

215 Samples with discordant antibody results (see below) were further evaluated using an in-house neutralising  
216 antibody assay as follows: Serial dilutions of heat-inactivated serum samples were incubated with 50-100 TCID<sub>50</sub>  
217 SARS-CoV-2 (hCoV-19/Austria/CeMM0360/2020; GISAID EPI\_ISL: 438123) for 1h at 37 °C. The mixture was  
218 added to Vero E6 (ATCC ® CRL-1586) cell monolayers and incubation was continued for two to three days. NT  
219 titers were expressed as the reciprocal of the serum dilution that protected against virus-induced cytopathic effects.  
220 NT titers  $\geq 10$  were considered positive. The study has been reported in accordance with STARI reporting  
221 guidelines for implementation studies.<sup>31</sup>

222

### 223 **Outcome measures and statistical analysis**

224 We present a descriptive statistics of patient demographics including age, gender and ethnicity; and the following  
225 four testing, viral and genomic outcomes:

226 **Outcome A:** The diagnostic accuracy (using sensitivity and specificity) of SARS-CoV-2 RT-qPCR among  
227 patients with mild to moderate flu-like symptoms at presentation by comparing molecular diagnosis with anti-  
228 SARS-CoV-2 antibody testing during convalescence, and hospital admission and death, including any alternative  
229 diagnoses for patients testing SARS-CoV-2 negative. To determine the accuracy of RT-qPCR, we stratified RT-  
230 qPCR results in four groups: true reactive (RT-qPCR reactive and confirmed antibody positive); false reactive  
231 (RT-qPCR reactive, antibody negative); true non-reactive (RT-qPCR non-reactive, antibody negative); and false  
232 non-reactive (RT-qPCR non-reactive, antibody positive).

233 **Outcome B:** The earliness of RT-qPCR testing by comparing the duration and number of symptoms during the  
234 first half of the outbreak (early presenters) and during the second half of the outbreak (late presenters). We  
235 calculated the earliness of RT-qPCR testing by determining the mean duration of symptoms, in days (range), and  
236 mean number of symptoms (range), across the three cohorts of patients with confirmed infection: early acute, late  
237 acute and late convalescent. The three cohorts were obtained by stratifying people with confirmed infection  
238 according to the date of presentation to the GP during the outbreak as follows: people presenting with acute  
239 infection (RT-qPCR reactive, confirmed antibody positive) during the first half of the outbreak (early acute  
240 disease) vs. those people presenting during the second half of the outbreak (late acute); and those people presenting  
241 with previous disease (RT-qPCR non-reactive but confirmed antibody positive) in the second half of the outbreak  
242 (late convalescent).

243 **Outcome C:** The key clinical symptoms associated with RT-qPCR reactivity (acute infection) and convalescent  
244 sero-positivity (confirmed infection) to determine any potential correlation between these stages of disease. We  
245 used multivariate logistic regression tested the association of 15 clinical symptoms with RT-qPCR reactivity at  
246 presentation and among all patients with confirmed infection. We reported the odds ratios (ORs) and the  
247 significance value ( $p$ ) of each covariate on testing RT-qPCR reactive, and confirmed positive antibody status  
248 respectively. We quantified the association between patients with reactive RT-qPCR (and confirmed antibody

249 positive) and all patients with confirmed infection by calculating the correlation coefficient  $r$ , and estimating the  
250 95% CI.

251 **Outcome D:** The number of viral clades implicated in the outbreak. To do this, SARS-CoV-2 full genome  
252 sequencing was undertaken as part of a wider study covering the whole of Austria.<sup>17,28</sup> The full-length sequences  
253 were matched to patient records by an anonymized unique identifier and uploaded to the Global Initiative on  
254 Sharing All Influenza Data (GISAID) database (<http://gisaid.org>).<sup>32</sup> Sequences were aligned in MEGA7 and non-  
255 synonymous nucleotide variants were identified to determine the respective clades, following the GISAID  
256 classification scheme for lineages.<sup>33</sup>

## 258 RESULTS

### 259 Overall testing results

260 Baseline characteristics for confirmed cases were similar for sex, age, and ethnic origin (Table 1). All patients  
261 were local residents and no endemic cases were documented among tourists. Figure 1 shows the flow-chart for  
262 the patient cohorts of this study. 73 patients presented with mild to moderate flu-like illness, all of whom received  
263 SARS-CoV-2 RT-qPCR (and influenza qPCR). Of those, 16 (21.9%) tested RT-qPCR reactive and 57 (78.1%)  
264 tested non-reactive, including four that tested influenza PCR reactive. Due to lack of venous blood sampling  
265 (obtained 3-6 weeks after initial presentation), antibody data was not available for 7 patients (1 RT-qPCR reactive  
266 vs. 6 non-reactive) that were excluded from this analysis. Therefore, of the 66 patients included in this analysis,  
267 22 patients (33.3%) had SARS-CoV-2 infection confirmed by antibody testing and 44 (66.7%) patients were  
268 confirmed seronegative. Of the former, eight patients (early acute presenters) presented in the first half of the  
269 outbreak (12 days from March 11 to 22, 2020) and 14 patients presented in the second half (March 23 to April  
270 03, 2020); of the latter, seven patients were late acute and seven late convalescent (Figure 2A). Alternative  
271 diagnoses of the 44 patients who tested SARS-CoV-2 negative included: influenza and infectious mononucleosis  
272 (N=2, each); bacterial tonsillitis, bacterial pneumonia, bronchitis and exacerbation of chronic obstructive  
273 pulmonary disease (COPD) (N=1, each) (see flow-chart, Figure 1). No hospital admissions or deaths were  
274 reported.

275 **Table 1: Summary of the demographic characteristics of COVID-19 cases.**

|             | People with confirmed infection<br>(seropositive, any RT-qPCR result)<br>(N=22) | People with acute infection<br>(RT-qPCR reactive and seropositive)<br>(N=15) |
|-------------|---------------------------------------------------------------------------------|------------------------------------------------------------------------------|
| Sex         |                                                                                 |                                                                              |
| Female      | 14 (63.6%)                                                                      | 9 (60%)                                                                      |
| Male        | 8 (36.4%)                                                                       | 6 (40%)                                                                      |
| Age (years) |                                                                                 |                                                                              |
| 16-24       | 4 (26.7%)                                                                       | 3 (20%)                                                                      |

|               |           |           |
|---------------|-----------|-----------|
| 25-34         | 4 (26.7%) | 2 (13.3%) |
| 35-49         | 6 (40%)   | 4 (26.7%) |
| >50           | 8 (36.4%) | 6 (40%)   |
| Ethnic origin |           |           |
| White         | 22 (100%) | 15 (100%) |

276

### 277 **Specificity and sensitivity of RT-qPCR**

278 In the absence of a gold standard, we used a consensus statement on serostatus, irrespective of RT-qPCR  
 279 outcomes, to establish whether an infection had occurred. We considered an infection as confirmed in any patient  
 280 who tested IgG ELISA positive on all five screening platforms (concordant results) or in any patient with  
 281 mismatch between ELISA test results (discordant results) but positive neutralising antibody assay (see flow-chart,  
 282 Figure 1). Of the 15 patients with reactive RT-qPCR, sera from nine patients were concordant positive and six  
 283 were discordant; and of the 53 patients with non-reactive RT-qPCR, sera from 41 patients were concordant  
 284 negative, 5 were concordant positive, and three were discordant. Sera from two patients diagnosed with influenza  
 285 who tested RT-qPCR non-reactive were concordant negative and included in this analysis. For the nine patients  
 286 with discordant results, we used neutralising antibody assay to confirm infection status. All patients (N=6) with  
 287 reactive RT-qPCR were neutralising antibody positive; and of the three patients with non-reactive RT-qPCR, two  
 288 were neutralising antibody positive, and one was negative. Therefore, overall, when combining ELISA and  
 289 neutralising antibody assay, 22 patients had confirmed infection, of whom 15 patients were RT-qPCR reactive  
 290 (true reactive) and seven were non-reactive (false non-reactive). There were no false reactive RT-qPCR results.  
 291 Therefore, RT-qPCR correctly identified infection in 15/22 patients (overall sensitivity of 68.1%). Sensitivity of  
 292 RT-qPCR among all acute (early and late) presenters and during the first half of the outbreak was high (100%),  
 293 but dropped to 50% in the second half of the outbreak. RT-qPCR correctly identified absence of infection for all  
 294 44 patients testing antibody negative (true non-reactive) indicating specificity of 100%.

295

### 296 **Earliness of RT-qPCR testing**

297 The mean duration of symptoms was 2 days (range 1-4) among early acute presenters, 4.4 days (range 1-7) among  
 298 late acute presenters, 8 days (range 2-12) among people with late convalescent infection, and 3.9 days (range 1-  
 299 14) among non-COVID-19 controls (Figure 2B). The mean number of symptoms was 6.75 (range 4-9) among  
 300 early acute presenters, 6.86 (3-12) among late acute presenters, 6.3 (1-11) among people with convalescent  
 301 infection, and 5.23 (range 2-11) among non-COVID-19 controls (Figure 2C).

302

### 303 **Regression analysis on confirmed infection**

304 Multivariate regression on all 66 patients, including 22 (31.9%) with confirmed infection, suggested that loss of  
 305 taste, but not loss of smell, was the key covariate significantly associated with positive serostatus (ORs=6.03;

p=0.047) (Table 2). Breathlessness (OR=6.9, p=0.054) and cough (OR=0.12, p=0.053) were also possible covariates of confirmed infection.

**Table 2: Regression analysis on symptoms reported by patients diagnosed with COVID-19.**

| Clinical symptom | People with confirmed infection (seropositive, any RT-qPCR result) (N=22) |               |         | People with acute disease (RT-qPCR reactive and seropositive) (N=15) |                 |         |
|------------------|---------------------------------------------------------------------------|---------------|---------|----------------------------------------------------------------------|-----------------|---------|
|                  | Odds ratio                                                                | 95% CI        | p-value | Odds ratio                                                           | 95% CI          | p-value |
| Change in taste  | 6.02                                                                      | (1.02,35.51)  | 0.047   | 571.72                                                               | (1.92,170629.2) | 0.029   |
| Nausea/vomiting  | 4.42                                                                      | (0.748,26.09) | 0.101   | 370.11                                                               | (2.71,50429.42) | 0.018   |
| Sore throat      | 0.36                                                                      | (0.067,1.93)  | 0.233   | 0.002                                                                | (0.000006,0.74) | 0.039   |
| Myalgia          | 1.15                                                                      | (0.24,5.51)   | 0.865   | 121.82                                                               | (1.52,9749.08)  | 0.032   |
| Breathlessness   | 6.90                                                                      | (0.96,49.40)  | 0.054   | 134.46                                                               | (1.02,17796.87) | 0.049   |
| Change in smell  | 0.77                                                                      | (0.098,6.15)  | 0.811   | 0.37                                                                 | (0.008,15.87)   | 0.607   |
| Fever            | 2.97                                                                      | (0.44,20.35)  | 0.266   | 1.44                                                                 | (0.057,36.66)   | 0.825   |
| Cough            | 0.12                                                                      | (0.014,1.03)  | 0.053   | 0.011                                                                | (0.00008,1.42)  | 0.069   |

**Caption to Table 2:** Symptoms associated with confirmed SARS-CoV-2 infection (antibody confirmed positive, irrespective of RT-qPCR result) among 22 patients, and with acute infection (RT-qPCR reactive, antibody confirmed positive) among 15 patients respectively.

### Regression analysis on acute disease

All 15 patients with acute disease reported fatigue and therefore this covariate was removed from the analysis; and observations from two patients with non-reactive RT-qPCR, who did not report fatigue, were also removed (Table 2). The multivariate logistic regression on the remaining 66 patients showed that the following covariates were associated with acute disease: loss of taste (OR=571.72; p=0.029), nausea and vomiting (OR=370.11; p=0.018), breathlessness (OR=134.46; p=0.049), myalgia (OR=121.82; p=0.032) and sore throat (OR=0.002, p=0.039); and but not loss of smell (OR=0.37, p=0.607), fever (OR=1.44, p=0.825) or cough (OR=0.01, p=0.069).

### Correlation between acute and confirmed infection

Testing RT-qPCR reactive was correlated with testing seropositive for COVID-19 infection ( $r=0.77$ , 95%CI 0.65~0.89). Among early and acute presenters, the correlation between the two tests was perfect (green and amber in Figure 2D), irrespective of the stage of the outbreak; whereas in the second half of the outbreak, RT-qPCR did not detect any case with convalescent infection (red curve on Figure 2D).

327

328 **Viral clade analysis**

329 Thirteen of 15 full-length genome sequences were available for clade analysis via GISAID (Table 3); and two  
 330 sequences were not available at the time of analysis. Lineages of SARS-CoV-2 have been identified based on  
 331 mutations in key amino acid positions.<sup>33</sup> Clade G is defined by the mutations D614G, C241T, C3037T and  
 332 A23403G in the Spike protein; and clade GR by additional RG203KR mutations in the Nucleocapsid protein N;  
 333 clade L is most closely related to the Wuhan reference strain (NC\_045512.2).<sup>34</sup> Accordingly, among the 13 viral  
 334 isolates, three different clades were identified, including clade L (N=2), GR (N=4) and L (N=7).

335 **Table 3: Genomic sequences accessed via GISAID listing key amino acid locations used for SARS-CoV-2**  
 336 **classification.**

| Disease Classification | Virus Name (GISAID)           | EPI_ISL_# | Date of RT-qPCR | Lineage    | ORF 8: 84 | ORF3a: 57 | S:614* | N:203** | N:204** |
|------------------------|-------------------------------|-----------|-----------------|------------|-----------|-----------|--------|---------|---------|
| Early acute            | hCoV-19/Austria/CeMM0191/2020 | 438032    | 13/03/2020      | B(L)       | L         | Q         | D      | R       | G       |
| Early acute            | hCoV-19/Austria/CeMM0248/2020 | 438078    | 21/03/2020      | B (L)      | L         | Q         | D      | R       | G       |
| Early acute            | hCoV-19/Austria/CeMM0018/2020 | 419671    | 19/03/2020      | B.1.1 (GR) | L         | Q         | G      | K       | R       |
| Early acute            | hCoV-19/Austria/CeMM0228/2020 | 438061    | 18/03/2020      | B.1.1 (GR) | L         | Q         | G      | K       | R       |
| Early acute            | hCoV-19/Austria/CeMM0235/2020 | 438066    | 19/03/2020      | B.1.1 (GR) | L         | Q         | G      | K       | R       |
| Early acute            | hCoV-19/Austria/CeMM0250/2020 | 438080    | 21/03/2020      | B.1.1 (GR) | L         | Q         | G      | K       | R       |
| Early acute            | hCoV-19/Austria/CeMM0222/2020 | 438056    | 17/03/2020      | B.1.8 (G)  | L         | Q         | G      | R       | G       |
| Early acute            | hCoV-19/Austria/CeMM0249/2020 | 438079    | 21/03/2020      | B.1.8 (G)  | L         | Q         | G      | R       | G       |
| Late acute             | hCoV-19/Austria/CeMM0267/2020 | 438096    | 24/03/2020      | B.1.8 (G)  | L         | Q         | G      | R       | G       |
| Late acute             | hCoV-19/Austria/CeMM0276/2020 | 438103    | 25/03/2020      | B.1.8 (G)  | L         | Q         | G      | R       | G       |
| Late acute             | hCoV-19/Austria/CeMM0303/2020 | 475778    | 29/03/2020      | B.1.8 (G)  | L         | Q         | G      | R       | G       |
| Late acute             | hCoV-19/Austria/CeMM0324/2020 | 475794    | 01/04/2020      | B.1.8 (G)  | L         | Q         | G      | R       | G       |
| Late acute             | hCoV-19/Austria/CeMM0337/2020 | 475800    | 03/04/2020      | B.1.8 (G)  | L         | Q         | G      | R       | G       |

337 **Caption Table 3:** SARS-CoV-2 clades are classified by The Global Initiative on Sharing All Influenza Data  
 338 (GISAID) using specific non-synonymous mutations in the viral genome. Clade G is defined by the mutations  
 339 D614G, C241T, C3037T and A23403G in the Spike protein; and clade GR by additional RG203KR mutations in  
 340 the Nucleocapsid protein N; clade L is most closely related to the Wuhan reference strain (NC\_045512.2).<sup>34</sup> Whole  
 341 genome data were available for 13/15 sequences; data for two sequences were not available at the time of analysis.  
 342 Accordingly, among the 13 sequences analysed, three different clades were identified, including clades L (N=2),  
 343 GR (N=4) and G (N=7). All three clades were detected in early acute infection, and clade G was additionally  
 344 detected in late acute infection. \*For simplicity reasons, only mutation D614G (grey background) in the Spike  
 345 protein defining clade G is shown. \*\*Additional mutations R203K and G204R in the Nucleocapsid protein N  
 346 defining clade GR are also shown in grey. ORF, open reading frame.

347

348 **DISCUSSION**

349 Our results demonstrate that SARS-CoV-2 RT-qPCR testing, when added to a national influenza surveillance  
 350 programme in primary care, can rapidly, early and accurately diagnose COVID-19 during an outbreak. Of the 73



1  
2  
3 351 patients presenting to the sentinel GP, 22 were diagnosed with COVID-19, including 15 patients with acute  
4 352 disease and seven with late convalescent infection respectively. The sensitivity and specificity of RT-qPCR were  
5 353 68.1% and 100%, but testing RT-qPCR reactive showed perfect correlation with seropositivity during the first  
6 354 half of the outbreak and among early acute (N=8 patients) and late acute presenters (N=7). Strikingly, the mean  
7 355 duration of symptoms of early presenters (2 days) was less than half of late acute presenters (4.4 days) and a  
8 356 quarter of late convalescent presenters (8 days). These findings highlight the need to undertake RT-qPCR testing  
9 357 rapidly and early as soon as symptoms occur. Acute infection was strongly associated with multiple symptoms,  
10 358 including loss of taste, nausea and vomiting, breathlessness, myalgia and sore throat; but loss of smell, fever and  
11 359 cough were not. Surprisingly, loss of taste, but not any other clinical symptom, was significantly associated with  
12 360 convalescent infection. Finally, viral genome analysis demonstrated the presence of three major SARS-CoV-2  
13 361 clades during the outbreak, suggesting that the outbreak was the result of independent transmission chains.  
14  
15  
16  
17  
18  
19  
20

21 363 Overall our findings help untangle COVID-19 infection during an outbreak in a ski-resort in Austria. Our results  
22 364 suggest that acute COVID-19 may be associated with a spectrum of symptoms and presence of multiple strains  
23 365 within one setting. This highlights the heterogeneity of coronavirus and the importance in containing outbreaks  
24 366 early before spread. While effective test-trace-isolate (TTI) strategies have been suggested as the key to containing  
25 367 the outbreak without intermittent lockdowns,<sup>35</sup> we suggest that systemic changes may also be needed. For  
26 368 example, behavioral changes, such as large-scale gathering of people in closed spaces has to be avoided as they  
27 369 may trigger emergence of individual clusters to form a superspreading event. Keeping a level of compliance to  
28 370 social distancing and reduced physical contacts is necessary to prevent any future wave. Enhanced testing is an  
29 371 important factor, and our study suggests that testing in primary care at symptom onset is highly accurate and  
30 372 should be something that governments should consider as an additional strategy.  
31  
32  
33  
34  
35

36 373  
37 374 Loss of taste of smell has been recognised as an important marker of COVID-19;<sup>36,37</sup> however, more than half of  
38 375 patients reported olfactory dysfunction after the onset of other symptoms when sensitivity of RT-qPCR may be  
39 376 reduced.<sup>38</sup> Furthermore, loss of taste could not be objectively confirmed in one third of people<sup>38</sup> suggesting self-  
40 377 assessment using a mobile phone application may not be as accurate as clinician-initiated RT-qPCR testing of  
41 378 people presenting with acute disease.<sup>39</sup> Timely and accurate testing is also a prerequisite for effective contact  
42 379 tracing.<sup>27</sup>  
43  
44  
45

46 380  
47 381 The outbreak we explored occurred after a three-day party (March 13-15) just before the skiing season was  
48 382 brought to a premature end due to the Austrian national lockdown measures on March 16. The index case was  
49 383 diagnosed on March 11 and the first secondary cases were reported two days after the celebrations. Therefore, it  
50 384 is possible that the outbreak we are describing here could be a possible superspreading event. Superspreading  
51 385 events have been associated with high intensity aerosol producing activities (shouting, singing) in confined spaces  
52 386 and potentially, the lockdown party might have triggered the local outbreak. The two acute disease clusters  
53 387 observed in this study may represent different types of viral exposure. First, inhalation of high-density aerosols at  
54 388 the party causing acute illness among early presenters and second, low level home transmission of party goers to  
55 389 (late presenting) friends and family during the lockdown. In our study, no COVID-19 cases were observed among  
56 390 children (persons <18 years of age), suggesting that any infected children may have remained asymptomatic or  
57  
58  
59  
60

1  
2  
3 391 did not attend the practice because of mild disease.<sup>40</sup> No further endemic cases were detected after the outbreak.  
4 392 This suggests that combination prevention including rapid testing and case notification in primary care, contact  
5 393 tracing and isolation, and lockdown measures can effectively terminate an outbreak. To our knowledge, our study  
6 394 is the first to demonstrate that the ECDC policy of additional COVID-19 screening at national influenza screening  
7 395 sites can effectively detect and control a regional outbreak.<sup>22</sup>  
8  
9  
10

396

11  
12  
13 397 Our study has many strengths. Our study was enabled by data from a well-established sentinel GP, participating  
14 398 in the National Influenza Screening Programme, covering the entire area of the outbreak. Importantly, national  
15 399 SARS-CoV-2 screening was adopted early, starting the day before the first two cases were reported in Austria;  
16 400 and 16 of 29 cases documented in the Schladming-Dachstein region, including the first and the last case, were  
17 401 detected at the sentinel GP. RT-qPCR testing was rapidly deployed by offering same day GP appointments, and  
18 402 result reporting and case notification within 24 hours. Rapid adoption of new commercial antibody platforms (Lab  
19 403 Mustafa, Salzburg) and in-house neutralising antibody testing assay (Medical University of Vienna) enabled  
20 404 accurate interpretation of RT-qPCR results.  
21  
22  
23  
24

405

25  
26 406 There are some limitations of our study. We used a relatively small patient cohort from a single sentinel GP,  
27 407 potentially limiting conclusions on causality and generalisability of our finding to other areas excluding seven  
28 408 patients for whom COVID-19 serostatus were not available. Lack of association with high fever and cough in our  
29 409 COVID-19 cohort may be due to the national health hotline directing patients with more severe disease to attend  
30 410 emergency service. Therefore, people with these symptoms might have preferred to attend acute services rather  
31 411 than the GP. Although we collected data prospectively, recall bias cannot be excluded. This could be suggested  
32 412 by the lack of association of symptoms of acute infection (nausea and vomiting, breathless and myalgia) among  
33 413 all people confirmed with infection (when including those with negative RT-qPCR), compared to those people  
34 414 presenting early (reactive RT-qPCR). Specific recall bias of taste is less likely, as it featured in both groups and  
35 415 data collection was completed prior to publication of the first systematic review of altered taste and smell in the  
36 416 media.<sup>41</sup> However, change or loss in smell/taste were not quantified using an established tool such as the visual  
37 417 analogue scale (VAS),<sup>42,43</sup> but rather assessed by simple “yes” and “no” answers using a standard clinical  
38 418 questionnaire, potentially leading to response style bias. Although asymptomatic infection is common,<sup>10</sup>  
39 419 asymptomatic people were excluded from this study as we were focusing on symptom-driven presentation. This  
40 420 potentially excludes an important segment of the infected population and future studies will focus on exploring  
41 421 this further. The presence of three viral clades within the outbreak suggests heterogeneity of the virus, but we  
42 422 have not explored this aspect in great details in this study, as this was beyond the scope of this work. In fact, the  
43 423 data presented here is part of the ongoing work untangling the phylogeny of SARS-CoV-2 clades in Austria and  
44 424 their worldwide spread.<sup>28</sup>  
45  
46  
47  
48  
49  
50  
51  
52  
53

425

54  
55  
56 426 To our knowledge, this is the first study to show that primary care can contribute to early case detection and  
57 427 termination of a SARS-CoV-2 outbreak in the community. Our study has important implications for patients,  
58 428 public health, and health systems; nationally and internationally for outbreak epidemiology and control. As  
59  
60

1  
2  
3 429 countries enter the viral suppression phase, early detection will be crucial in the prevention and control of the  
4 430 disease. Early testing at onset of disease, followed by timely contact tracing and case isolation of secondary cases  
5 431 should prevent onward transmission and reduce the reproduction number  $R_e$  below 1. Austria has increased the  
6 432 number of its sentinel sites from 91 to 231 due to COVID-19, indicating that primary care has become an essential  
7 433 partner in a comprehensive surveillance strategy for disease prevention and control. Clade analysis could greatly  
8 434 enhance public health surveillance in the UK where only three quarters of contact tracing is being completed.<sup>44</sup>  
9 435 Key priorities for future research include systematic prospective quantitative and qualitative evaluation of the  
10 436 Austrian National SARS-CoV-2 screening programme during the seasonal influenza season, and generalisability  
11 437 of the intervention in multi-ethnic inner-city settings including genomic analysis using deep viral genome  
12 438 sequencing to support complex contact tracing, and adaption of the REAP-1 protocol to include SARS-CoV-2  
13 439 lateral flow antigen testing.  
14  
15  
16  
17  
18  
19  
20  
21  
22

## 441 CONCLUSIONS

23 442 RT-qPCR testing in primary care can rapidly and accurately detect SARS-CoV-2 among people presenting with  
24 443 mild-to-moderate illness in a heterogeneous viral community outbreak. This study demonstrates high rates of  
25 444 accurate and early viral detection associated with symptomatic testing in primary care during a COVID-19  
26 445 outbreak, which is required for an effective TTI strategy. Targeted testing in primary care can support national  
27 446 sentinel surveillance of coronavirus.  
28  
29  
30  
31  
32

33 448 **Authors' Contributions:** WL, OL, MRF, MEMK, EMH, CH and JPG contributed to the design of the study.  
34 449 OL and EMH took nasopharyngeal swabs. OL, EMH and CH maintained the clinical data base. AS and RG  
35 450 submitted the ethics application. MRF provided RT-qPCR data; BA, AL, AMP, JWG, TP, SA, CB and AB; and  
36 451 JVC conducted clade analysis, MEMK produced ELISA data, KS performed the neutralising antibody assay.  
37 452 JPG and WL conducted the statistical analysis. WL and JPG wrote the manuscript with contributions from OL,  
38 453 MRF, MEMK, RCG, JVC, CB, AB, KS, EMH, CH, AS and CG. All authors read and approved the final  
39 454 version.  
40  
41  
42

43 455 **Acknowledgments:** We thank Evelyn Marktl for daily updates on the Christian Drosten's COVID-19 podcast  
44 456 (<https://www.ndr.de/nachrichten/info/podcast4684.html>). We are grateful to the team of Praxis Dr Lammel for  
45 457 their contributions, and in particular to the nurse Sabine Roiderer for providing direct patient care and help with  
46 458 administration. We thank the patients of Schladming-Dachstein for participating in the study.  
47  
48  
49

50 459 **Funding:** This research was self-funded by each individual co-author. This project received funding from the  
51 460 Vienna Science and Technology Fund (WWTF) as part of the WWTF COVID-19 Rapid Response Funding  
52 461 2020. Award/Grant number is not applicable.  
53

54 462 **Ethics approval:** The study used secondary anonymised data for which approval was granted by the University  
55 463 of Graz Research Ethics Committee, Austria (reference number: 32-429 ex 19/20).  
56

57 464 **Patient consent for publication:** Consent may not be required as no identifiable details on individuals are  
58 465 reported in this manuscript.  
59  
60

1  
2  
3 466 **Patient and public involvement:** No patient involvement.

4  
5 467 **Data availability statement:** The datasets used and/or analysed during the current study are available from the  
6 468 corresponding author on reasonable request.

7  
8 469 **Competing Interests:** None declared.  
9

10 470

## 11 471 **References**

- 12 472 1. World Health Organisation (WHO). Clinical management of severe acute respiratory infection when  
13 473 COVID-19 is suspected. 2020. [https://www.who.int/publications-detail/clinical-management-of-severe-acute-respiratory-infection-when-novel-coronavirus-\(ncov\)-infection-is-suspected](https://www.who.int/publications-detail/clinical-management-of-severe-acute-respiratory-infection-when-novel-coronavirus-(ncov)-infection-is-suspected) (accessed July 02, 2020).
- 14 475 2. Lauer SA, Grantz KH, Bi Q, et al. The Incubation Period of Coronavirus Disease 2019 (COVID-19)  
15 476 From Publicly Reported Confirmed Cases: Estimation and Application. *Ann Intern Med* 2020; 172(9): 577-82.
- 16 477 3. Cheng HY, Jian SW, Liu DP, Ng TC, Huang WT, Lin HH. Contact Tracing Assessment of COVID-19  
17 478 Transmission Dynamics in Taiwan and Risk at Different Exposure Periods Before and After Symptom Onset.  
18 479 *JAMA Intern Med* 2020.
- 19 480 4. Kimball A, Hatfield KM, Arons M, et al. Asymptomatic and Presymptomatic SARS-CoV-2 Infections  
20 481 in Residents of a Long-Term Care Skilled Nursing Facility - King County, Washington, March 2020. *MMWR*  
21 482 *Morb Mortal Wkly Rep* 2020; 69(13): 377-81.
- 22 483 5. Bullard J, Dust K, Funk D, et al. Predicting infectious SARS-CoV-2 from diagnostic samples. *Clin*  
23 484 *Infect Dis* 2020.
- 24 485 6. Wölfel R, Corman VM, Guggemos W, et al. Virological assessment of hospitalized patients with  
25 486 COVID-2019. *Nature* 2020; 581(7809): 465-9.
- 26 487 7. Cevik M, Tate M, Lloyd O, Maraolo AE, Schafers J, Ho A. SARS-CoV-2, SARS-CoV-1 and MERS-  
27 488 CoV viral load dynamics, duration of viral shedding and infectiousness: a living systematic review and meta-  
28 489 analysis. *medRxiv* 2020: 2020.07.25.20162107.
- 29 490 8. Endo A, Abbott S, Kucharski AJ, Funk S. Estimating the overdispersion in COVID-19 transmission  
30 491 using outbreak sizes outside China. *Wellcome Open Res* 2020; 5: 67.
- 31 492 9. Sayampanathan AA, Heng CS, Pin PH, Pang J, Leong TY, Lee VJ. Infectivity of asymptomatic versus  
32 493 symptomatic COVID-19. *Lancet* 2021; 397(10269): 93-4.
- 33 494 10. Byambasuren O, Cardona M, Bell K, Clark J, McLaws M-L, Glasziou P. Estimating the extent of  
34 495 asymptomatic COVID-19 and its potential for community transmission: Systematic review and meta-analysis.  
35 496 *Official Journal of the Association of Medical Microbiology and Infectious Disease Canada* 2020; 5(4): 223-34.
- 36 497 11. Bi Q, Wu Y, Mei S, et al. Epidemiology and transmission of COVID-19 in 391 cases and 1286 of their  
37 498 close contacts in Shenzhen, China: a retrospective cohort study. *Lancet Infect Dis* 2020.
- 38 499 12. Li R, Pei S, Chen B, et al. Substantial undocumented infection facilitates the rapid dissemination of  
39 500 novel coronavirus (SARS-CoV-2). *Science* 2020; 368(6490): 489-93.
- 40 501 13. European Centre for Disease Control and Prevention (ECDC). Rapid Risk Assessment: Coronavirus  
41 502 disease 2019 (COVID-19) in the EU/EEA and the UK– ninth update. 2020.  
42 503 [https://www.ecdc.europa.eu/en/publications-data/rapid-risk-assessment-coronavirus-disease-2019-covid-19-](https://www.ecdc.europa.eu/en/publications-data/rapid-risk-assessment-coronavirus-disease-2019-covid-19-pandemic-ninth-update)  
43 504 [pandemic-ninth-update](https://www.ecdc.europa.eu/en/publications-data/rapid-risk-assessment-coronavirus-disease-2019-covid-19-pandemic-ninth-update) (accessed July 02, 2020).
- 44 505 14. Koo JR, Cook AR, Park M, et al. Interventions to mitigate early spread of SARS-CoV-2 in Singapore:  
45 506 a modelling study. *Lancet Infect Dis* 2020.
- 46 507 15. Frieden TR, Lee CT. Identifying and Interrupting Superspreading Events-Implications for Control of  
47 508 Severe Acute Respiratory Syndrome Coronavirus 2. *Emerg Infect Dis* 2020; 26(6): 1059-66.
- 48 509 16. Kreidl P, Schmid D, Maritschnik S, et al. Emergence of coronavirus disease 2019 (COVID-19) in  
49 510 Austria. *Wien Klin Wochenschr* 2020: 1-8.
- 50 511 17. Popa A, Genger JW, Nicholson MD, et al. Genomic epidemiology of superspreading events in Austria  
51 512 reveals mutational dynamics and transmission properties of SARS-CoV-2. *Sci Transl Med* 2020; 12(573).

- 1  
2  
3 513 18. Independent T. [https://www.independent.co.uk/news/world/europe/coronavirus-austria-cases-covid-19-](https://www.independent.co.uk/news/world/europe/coronavirus-austria-cases-covid-19-hospital-lockdown-latest-a9466281.html)  
4 514 hospital-lockdown-latest-a9466281.html. 2020.(Accessed September 05, 2020)
- 5 515 19. (European Centre for Disease Control and Prevention (ECDC). Coronavirus disease 2019 (COVID-19)  
6 516 in the EU/EEA and the UK –ninth update, 2020.  
7 517 [https://www.ecdc.europa.eu/sites/default/files/documents/covid-19-rapid-risk-assessment-coronavirus-disease-](https://www.ecdc.europa.eu/sites/default/files/documents/covid-19-rapid-risk-assessment-coronavirus-disease-2019-ninth-update-23-april-2020.pdf)  
8 518 2019-ninth-update-23-april-2020.pdf (Accessed July 02, 2020)
- 9 519 20. de Sutter A, Llor C, Maier M, et al. Family medicine in times of 'COVID-19': A generalists' voice. *Eur*  
10 520 *J Gen Pract* 2020; 26(1): 58-60.
- 11 521 21. Hull SA, Williams C, Ashworth M, Carvalho C, Boomla K. Prevalence of suspected COVID-19  
12 522 infection in patients from ethnic minority populations: a cross-sectional study in primary care. *British Journal of*  
13 523 *General Practice* 2020; 70(699): e696-e704.
- 14 524 22. European Centres for Disease Control (ECDC). Strategies for the surveillance of COVID-19, 2020.  
15 525 <https://www.ecdc.europa.eu/sites/default/files/documents/COVID-19-surveillance-strategy-9-Apr-2020.pdf>  
16 526 (accessed July 11, 2020).
- 17 527 23. de Lusignan S, Dorward J, Correa A, et al. Risk factors for SARS-CoV-2 among patients in the Oxford  
18 528 Royal College of General Practitioners Research and Surveillance Centre primary care network: a cross-  
19 529 sectional study. *Lancet Infect Dis* 2020.
- 20 530 24. Zentrum für Virologie Medizinische Universität Wien. Projekt Diagnostisches Influenzanezwerk  
21 531 Österreich (DINÖ). [https://www.virologie.meduniwien.ac.at/wissenschaft-forschung/virus-](https://www.virologie.meduniwien.ac.at/wissenschaft-forschung/virus-epidemiologie/influenza-projekt-diagnostisches-influenzanezwerk-oesterreich-dinoe/)  
22 532 epidemiologie/influenza-projekt-diagnostisches-influenzanezwerk-oesterreich-dinoe/ (Accessed July 02, 2020).
- 23 533 25. Federal Ministry of Social Affairs H, Care and Consumer Protection, Republic of Austria. National  
24 534 Health Hotline 1450. 2019. <https://www.1450.at/1450-die-gesundheitsnummer/> (accessed May 28, 2020).
- 25 535 26. Corman V, Bleicker T, Brünink S, et al. Diagnostic detection of 2019-nCoV by real-time RT-PCR.  
26 536 [https://www.who.int/docs/default-source/coronaviruse/protocol-v2-1.pdf?sfvrsn=a9ef618c\\_2](https://www.who.int/docs/default-source/coronaviruse/protocol-v2-1.pdf?sfvrsn=a9ef618c_2) (accessed  
27 537 September 29, 2020).
- 28 538 27. Kretzschmar ME, Rozhnova G, Bootsma MCJ, van Boven M, van de Wijgert JHHM, Bonten MJM.  
29 539 Impact of delays on effectiveness of contact tracing strategies for COVID-19: a modelling study. *The Lancet*  
30 540 *Public Health*.
- 31 541 28. Stadlbauer D, Amanat F, Chromikova V, et al. SARS-CoV-2 Seroconversion in Humans: A Detailed  
32 542 Protocol for a Serological Assay, Antigen Production, and Test Setup. *Curr Protoc Microbiol* 2020; 57(1): e100.
- 33 543 29. Ahn JY, Sohn Y, Lee SH, et al. Use of Convalescent Plasma Therapy in Two COVID-19 Patients with  
34 544 Acute Respiratory Distress Syndrome in Korea. *J Korean Med Sci* 2020; 35(14): e149.
- 35 545 30. Pinnock H, Epiphaniou E, Sheikh A, et al. Developing standards for reporting implementation studies  
36 546 of complex interventions (StaRI): a systematic review and e-Delphi. *Implementation Science* 2015; 10(1): 42.
- 37 547 31. Shu Y, McCauley J. GISAID: Global initiative on sharing all influenza data - from vision to reality.  
38 548 *Eurosurveillance: bulletin European sur les maladies transmissibles = European communicable disease bulletin*  
39 549 2017; 22(13).
- 40 550 32. Mercatelli D, Giorgi FM. Geographic and Genomic Distribution of SARS-CoV-2 Mutations. *Frontiers*  
41 551 *in Microbiology* 2020; 11(1800).
- 42 552 33. Global Initiative on Sharing All Influenza Data (GISAID). Clade and lineage nomenclature aids in  
43 553 genomic epidemiology studies of active hCoV-19 viruses. 2020. [https://www.gisaid.org/references/statements-](https://www.gisaid.org/references/statements-clarifications/clade-and-lineage-nomenclature-aids-in-genomic-epidemiology-of-active-hcov-19-viruses/)  
44 554 clarifications/clade-and-lineage-nomenclature-aids-in-genomic-epidemiology-of-active-hcov-19-viruses/  
45 555 (accessed September 05, 2020).
- 46 556 34. Panovska-Griffiths J, Kerr CC, Stuart RM, et al. Determining the optimal strategy for reopening  
47 557 schools, the impact of test and trace interventions, and the risk of occurrence of a second COVID-19 epidemic  
48 558 wave in the UK: a modelling study. *The Lancet Child & Adolescent Health*.
- 49 559 35. Aziz M, Goyal H, Haghbin H, Lee-Smith WM, Gajendran M, Perisetti A. The Association of "Loss of  
50 560 Smell" to COVID-19: A Systematic Review and Meta-Nnalysis. *Am J Med Sci* 2020.
- 51 561 36. von Bartheld CS, Hagen MM, Butowt R. Prevalence of Chemosensory Dysfunction in COVID-19  
52 562 Patients: A Systematic Review and Meta-analysis Reveals Significant Ethnic Differences. *ACS Chem Neurosci*  
53 563 2020; 11(19): 2944-61.

- 1  
2  
3 564 37. Lechien JR, Chiesa-Estomba CM, Hans S, Barillari MR, Jouffe L, Saussez S. Loss of Smell and Taste  
4 565 in 2013 European Patients With Mild to Moderate COVID-19. *Ann Intern Med* 2020.
- 5 566 38. Menni C, Valdes AM, Freidin MB, et al. Real-time tracking of self-reported symptoms to predict  
6 567 potential COVID-19. *Nat Med* 2020.
- 8 568 39. Maltezou HC, Vorou R, Papadima K, et al. Transmission dynamics of SARS-CoV-2 within families  
9 569 with children in Greece: A study of 23 clusters. *J Med Virol* 2020.
- 10 570 40. Lovato A, de Filippis C. Clinical Presentation of COVID-19: A Systematic Review Focusing on Upper  
11 571 Airway Symptoms. *Ear Nose Throat J* 2020: 145561320920762.
- 13 572 41. Sung Y-T, Wu J-S. The Visual Analogue Scale for Rating, Ranking and Paired-Comparison (VAS-  
14 573 RRP): A new technique for psychological measurement. *Behav Res Methods* 2018; 50(4): 1694-715.
- 15 574 42. Rojas-Lechuga MJ, Izquierdo-Domínguez A, Chiesa-Estomba C, et al. Chemosensory dysfunction in  
16 575 COVID-19 out-patients. *Eur Arch Otorhinolaryngol* 2020: 1-8.
- 17 576 43. NHS England England. NHS Test and Trace – week 4 of contact tracing, England: 18 to 24 June 2020.  
18 577 2020. <https://www.gov.uk/government/publications/nhs-test-and-trace-statistics-england-18-june-to-24-june-2020/weekly-nhs-test-and-trace-bulletin-england-18-24-june-2020> (accessed September 09, 2020).  
19 578  
20 579

## 22 580 **FIGURE LEGENDS**

24 581 Figure 1: Flow-chart. Twenty-two patients had COVID-19 infection confirmed by antibody testing, including 15  
25 582 patients diagnosed with acute disease (reactive RT-qPCR) and 7 with convalescent disease (non-reactive RT-  
26 583 qPCR); among the former, 9 patients tested concordant antibody positive and 6 patients tested neutralizing  
27 584 antibody positive following discordant ELISA result; and among the latter, 5 patients tested concordant  
28 585 antibody positive and 2 patients tested neutralizing antibody positive following discordant ELISA result. 44  
29 586 patients with non-reactive RT-qPCR tested antibody negative, including 41 with concordant negative ELISA, 1  
30 587 patient with negative neutralizing antibody after discordant ELISA result and 2 patients diagnosed with  
31 588 Influenza. Antibody status was not available for 7 patients. \*\*Final clinical diagnoses included infectious  
32 589 mononucleosis (N=2); bacterial tonsillitis, bacterial pneumonia, and bronchitis and exacerbation of COPD  
33 590 (N=1, each). \*\*\*No concordant negatives.

39 591  
40 592 Figure 2: (A) Cumulative COVID-19 diagnosis in the ski-resort Schladming-Dachstein over time. The main  
41 593 outbreak occurred after a three-day party event (March 13 to 15) celebrating the early termination of the skiing  
42 594 season due to National lockdown commencing on March 16. Between March 11 (index case) and April 03 (last  
43 595 endemic case), 8 people were diagnosed with acute infection (RT-qPCR-reactive, confirmed antibody positive)  
44 596 in the first half (12 days from March 11 to 22, 2020) of the outbreak (green colour), and 7 people with late acute  
45 597 infection (amber) and 7 people with convalescent infection (red) were detected during the second half; (B)  
46 598 Cumulative weekly numbers of confirmed COVID-19 cases during the outbreak. RT-qPCR was 100% sensitive  
47 599 among all early acute and late acute presenters. RT-qPCR did not detect any of the late convalescent presenters;  
48 600 (C) Mean duration of symptoms; and (D): Mean number of symptoms.

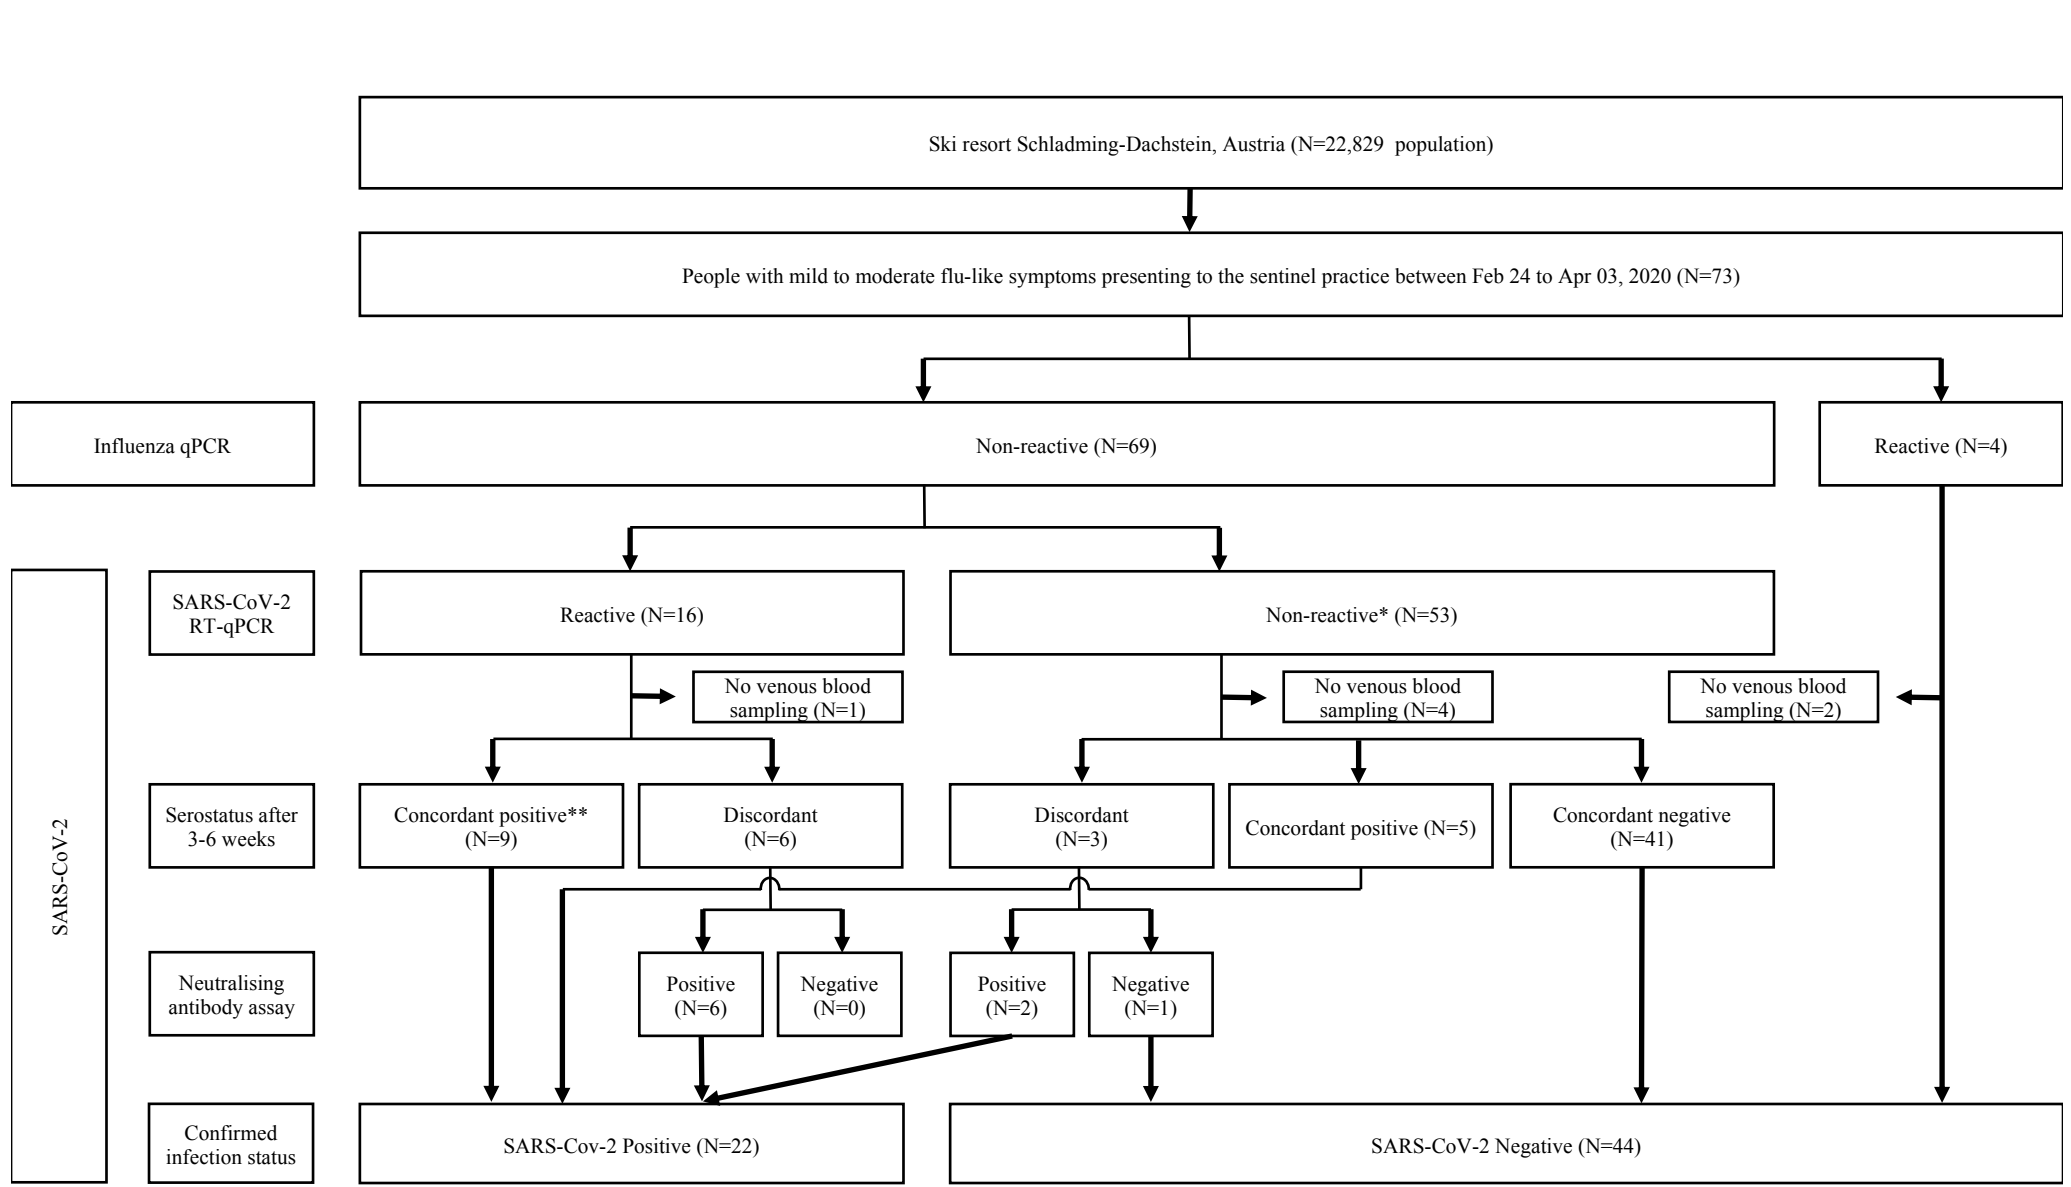

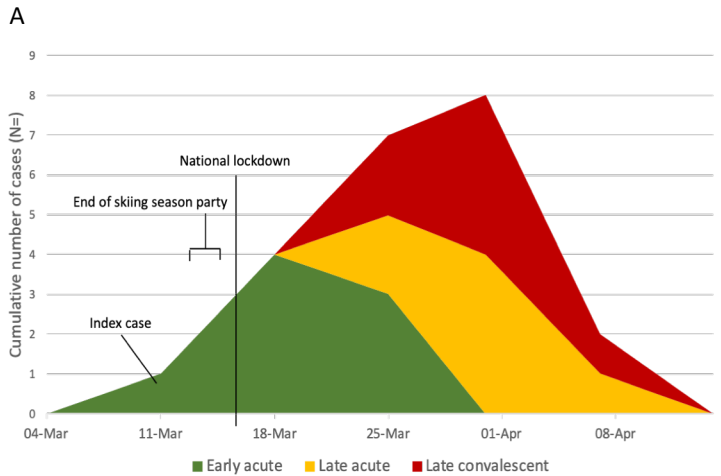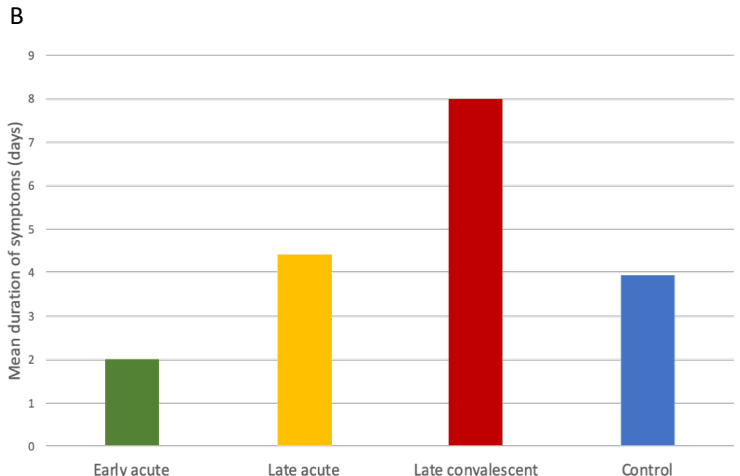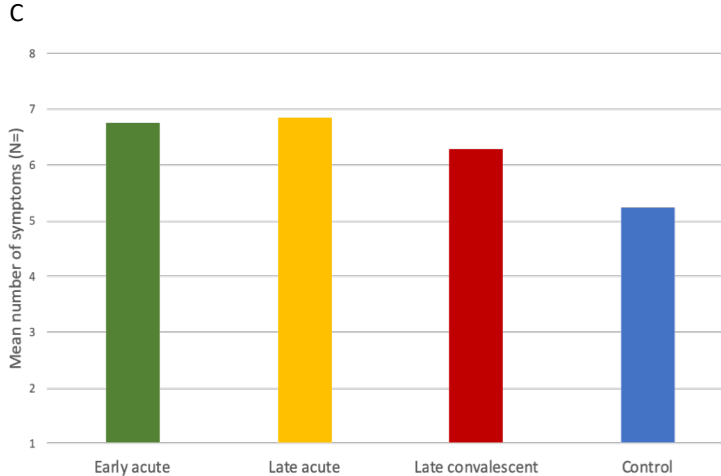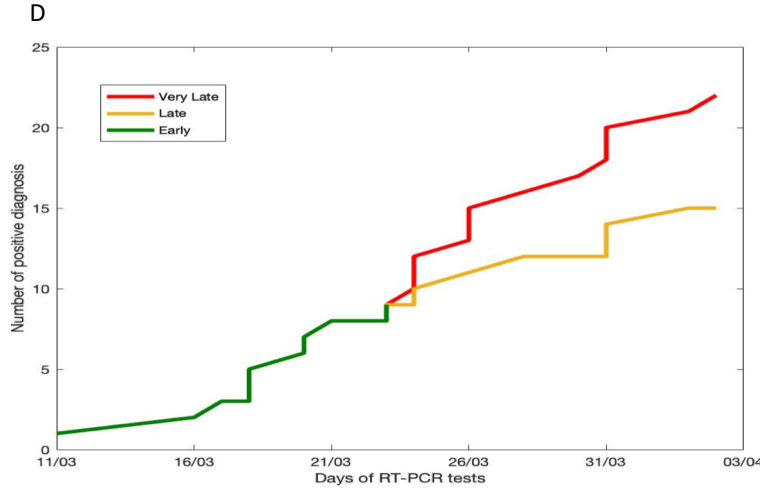

1  
2  
3  
4  
5  
6  
7  
8  
9  
10  
11  
12  
13  
14  
15  
16  
17  
18  
19  
20  
21  
22  
23  
24  
25  
26  
27  
28  
29  
30  
31  
32  
33  
34  
35  
36  
37  
38  
39  
40  
41



**STROBE 2007 (v4) Statement—Checklist of items that should be included in reports of *cohort studies***

| Section/Topic                | Item # | Recommendation                                                                                                                                                                       | Reported on page # |
|------------------------------|--------|--------------------------------------------------------------------------------------------------------------------------------------------------------------------------------------|--------------------|
| <b>Title and abstract</b>    | 1      | (a) Indicate the study's design with a commonly used term in the title or the abstract                                                                                               | 2                  |
|                              |        | (b) Provide in the abstract an informative and balanced summary of what was done and what was found                                                                                  | 2,3                |
| <b>Introduction</b>          |        |                                                                                                                                                                                      |                    |
| Background/rationale         | 2      | Explain the scientific background and rationale for the investigation being reported                                                                                                 | 3,4                |
| Objectives                   | 3      | State specific objectives, including any prespecified hypotheses                                                                                                                     | 4                  |
| <b>Methods</b>               |        |                                                                                                                                                                                      |                    |
| Study design                 | 4      | Present key elements of study design early in the paper                                                                                                                              | 5                  |
| Setting                      | 5      | Describe the setting, locations, and relevant dates, including periods of recruitment, exposure, follow-up, and data collection                                                      | 5                  |
| Participants                 | 6      | (a) Give the eligibility criteria, and the sources and methods of selection of participants. Describe methods of follow-up                                                           | 5                  |
|                              |        | (b) For matched studies, give matching criteria and number of exposed and unexposed                                                                                                  | NA                 |
| Variables                    | 7      | Clearly define all outcomes, exposures, predictors, potential confounders, and effect modifiers. Give diagnostic criteria, if applicable                                             | 7,8                |
| Data sources/<br>measurement | 8*     | For each variable of interest, give sources of data and details of methods of assessment (measurement). Describe comparability of assessment methods if there is more than one group | 6,7                |
| Bias                         | 9      | Describe any efforts to address potential sources of bias                                                                                                                            | 6,13               |
| Study size                   | 10     | Explain how the study size was arrived at                                                                                                                                            | 5                  |
| Quantitative variables       | 11     | Explain how quantitative variables were handled in the analyses. If applicable, describe which groupings were chosen and why                                                         | 7,8                |
| Statistical methods          | 12     | (a) Describe all statistical methods, including those used to control for confounding                                                                                                | 7,8                |
|                              |        | (b) Describe any methods used to examine subgroups and interactions                                                                                                                  | 7,8                |
|                              |        | (c) Explain how missing data were addressed                                                                                                                                          | 8                  |
|                              |        | (d) If applicable, explain how loss to follow-up was addressed                                                                                                                       | 8                  |
|                              |        | (e) Describe any sensitivity analyses                                                                                                                                                | NA                 |
| <b>Results</b>               |        |                                                                                                                                                                                      |                    |

|                          |     |                                                                                                                                                                                                              |                   |
|--------------------------|-----|--------------------------------------------------------------------------------------------------------------------------------------------------------------------------------------------------------------|-------------------|
| Participants             | 13* | (a) Report numbers of individuals at each stage of study—eg numbers potentially eligible, examined for eligibility, confirmed eligible, included in the study, completing follow-up, and analysed            | 8                 |
|                          |     | (b) Give reasons for non-participation at each stage                                                                                                                                                         | 8                 |
|                          |     | (c) Consider use of a flow diagram                                                                                                                                                                           | Figure 1 attached |
| Descriptive data         | 14* | (a) Give characteristics of study participants (eg demographic, clinical, social) and information on exposures and potential confounders                                                                     | 8                 |
|                          |     | (b) Indicate number of participants with missing data for each variable of interest                                                                                                                          | 8                 |
|                          |     | (c) Summarise follow-up time (eg, average and total amount)                                                                                                                                                  | 8                 |
| Outcome data             | 15* | Report numbers of outcome events or summary measures over time                                                                                                                                               | 8                 |
| Main results             | 16  | (a) Give unadjusted estimates and, if applicable, confounder-adjusted estimates and their precision (eg, 95% confidence interval). Make clear which confounders were adjusted for and why they were included | 9,10              |
|                          |     | (b) Report category boundaries when continuous variables were categorized                                                                                                                                    | NA                |
|                          |     | (c) If relevant, consider translating estimates of relative risk into absolute risk for a meaningful time period                                                                                             | NA                |
| Other analyses           | 17  | Report other analyses done—eg analyses of subgroups and interactions, and sensitivity analyses                                                                                                               | 9,10              |
| <b>Discussion</b>        |     |                                                                                                                                                                                                              |                   |
| Key results              | 18  | Summarise key results with reference to study objectives                                                                                                                                                     | 11,12             |
| <b>Limitations</b>       |     |                                                                                                                                                                                                              | 13                |
| Interpretation           | 20  | Give a cautious overall interpretation of results considering objectives, limitations, multiplicity of analyses, results from similar studies, and other relevant evidence                                   | 12,13             |
| Generalisability         | 21  | Discuss the generalisability (external validity) of the study results                                                                                                                                        | 13                |
| <b>Other information</b> |     |                                                                                                                                                                                                              |                   |
| Funding                  | 22  | Give the source of funding and the role of the funders for the present study and, if applicable, for the original study on which the present article is based                                                | 14                |

\*Give information separately for cases and controls in case-control studies and, if applicable, for exposed and unexposed groups in cohort and cross-sectional studies.

**Note:** An Explanation and Elaboration article discusses each checklist item and gives methodological background and published examples of transparent reporting. The STROBE checklist is best used in conjunction with this article (freely available on the Web sites of PLoS Medicine at <http://www.plosmedicine.org/>, Annals of Internal Medicine at <http://www.annals.org/>, and Epidemiology at <http://www.epidem.com/>). Information on the STROBE Initiative is available at [www.strobe-statement.org](http://www.strobe-statement.org).

# BMJ Open

## Rapid, early and accurate SARS-CoV-2 detection using RT-PCR in primary care: A prospective cohort study (REAP-1)

|                                 |                                                                                                                                                                                                                                                                                                                                                                                                                                                                                                                                                                                                                                                                                                                                                                                                                                                                                                                                                                                                                                                                                                                                                                                                                                                                                                                                                                                                                                                                                                                                                                                                                                                                                                                                                                                                                                                                                                                                                                                                                                                                                                                                                                  |
|---------------------------------|------------------------------------------------------------------------------------------------------------------------------------------------------------------------------------------------------------------------------------------------------------------------------------------------------------------------------------------------------------------------------------------------------------------------------------------------------------------------------------------------------------------------------------------------------------------------------------------------------------------------------------------------------------------------------------------------------------------------------------------------------------------------------------------------------------------------------------------------------------------------------------------------------------------------------------------------------------------------------------------------------------------------------------------------------------------------------------------------------------------------------------------------------------------------------------------------------------------------------------------------------------------------------------------------------------------------------------------------------------------------------------------------------------------------------------------------------------------------------------------------------------------------------------------------------------------------------------------------------------------------------------------------------------------------------------------------------------------------------------------------------------------------------------------------------------------------------------------------------------------------------------------------------------------------------------------------------------------------------------------------------------------------------------------------------------------------------------------------------------------------------------------------------------------|
| Journal:                        | <i>BMJ Open</i>                                                                                                                                                                                                                                                                                                                                                                                                                                                                                                                                                                                                                                                                                                                                                                                                                                                                                                                                                                                                                                                                                                                                                                                                                                                                                                                                                                                                                                                                                                                                                                                                                                                                                                                                                                                                                                                                                                                                                                                                                                                                                                                                                  |
| Manuscript ID                   | bmjopen-2020-045225.R2                                                                                                                                                                                                                                                                                                                                                                                                                                                                                                                                                                                                                                                                                                                                                                                                                                                                                                                                                                                                                                                                                                                                                                                                                                                                                                                                                                                                                                                                                                                                                                                                                                                                                                                                                                                                                                                                                                                                                                                                                                                                                                                                           |
| Article Type:                   | Original research                                                                                                                                                                                                                                                                                                                                                                                                                                                                                                                                                                                                                                                                                                                                                                                                                                                                                                                                                                                                                                                                                                                                                                                                                                                                                                                                                                                                                                                                                                                                                                                                                                                                                                                                                                                                                                                                                                                                                                                                                                                                                                                                                |
| Date Submitted by the Author:   | 18-Mar-2021                                                                                                                                                                                                                                                                                                                                                                                                                                                                                                                                                                                                                                                                                                                                                                                                                                                                                                                                                                                                                                                                                                                                                                                                                                                                                                                                                                                                                                                                                                                                                                                                                                                                                                                                                                                                                                                                                                                                                                                                                                                                                                                                                      |
| Complete List of Authors:       | <p>Leber, Werner; Queen Mary University of London, Institute of Population Health Sciences, Centre for Clinical Effectiveness and Health Data Science</p> <p>Lammel, Oliver; Praxis Dr Lammel</p> <p>Redlberger-Fritz, Monika; Medical University of Vienna, Center for Virology</p> <p>Mustafa-Korninger, Maria Elisabeth; 4 Medizinisch-chemisches Labor Dr. Mustafa, Dr. Richter OG</p> <p>Glehr, Reingard Christina; Medical University of Graz, Institute of General Practice and Evidence-based Health Services Research</p> <p>Camp, Jeremy; Medical University of Vienna, Center for Virology</p> <p>Agerer, Benedikt; Research Center for Molecular Medicine of the Austrian Academy of Sciences</p> <p>Lercher, Alexander; Research Center for Molecular Medicine of the Austrian Academy of Sciences</p> <p>Popa, Alexandra; Research Center for Molecular Medicine of the Austrian Academy of Sciences</p> <p>Genger, Jakob-Wendelin; Research Center for Molecular Medicine of the Austrian Academy of Sciences</p> <p>Penz, Thomas; Research Center for Molecular Medicine of the Austrian Academy of Sciences</p> <p>Aberle, Stephan; Medical University of Vienna, Center for Virology</p> <p>Bock, Christoph; Research Center for Molecular Medicine of the Austrian Academy of Sciences</p> <p>Bergthaler, Andreas; Research Center for Molecular Medicine of the Austrian Academy of Sciences</p> <p>Stiasny, Karin; Medical University of Vienna, Center for Virology</p> <p>Hochstrasser, Eva-Maria; Praxis Dr Lammel</p> <p>Hoellinger, Christian; Paracelsus Medical Private University</p> <p>Siebenhofer, Andrea; Institute of General Practice and Evidence-based Health Services Research, Medical University Graz; Institute for General Practice, Goethe University Frankfurt</p> <p>Griffiths, Chris; Queen Mary University of London, Institute of Population Health Sciences</p> <p>Panovska-Griffiths, Jasmina; NIHR CLAHRC North Thames, Department of Applied Health Research, University College London, London, United Kingdom; University of Oxford, Wolfson Centre for Mathematical Biology &amp; The Queen's College</p> |
| <b>Primary Subject Heading</b>: | General practice / Family practice                                                                                                                                                                                                                                                                                                                                                                                                                                                                                                                                                                                                                                                                                                                                                                                                                                                                                                                                                                                                                                                                                                                                                                                                                                                                                                                                                                                                                                                                                                                                                                                                                                                                                                                                                                                                                                                                                                                                                                                                                                                                                                                               |

1  
2  
3  
4  
5  
6  
7  
8  
9  
10  
11  
12  
13  
14  
15  
16  
17  
18  
19  
20  
21  
22  
23  
24  
25  
26  
27  
28  
29  
30  
31  
32  
33  
34  
35  
36  
37  
38  
39  
40  
41  
42  
43  
44  
45  
46  
47  
48  
49  
50  
51  
52  
53  
54  
55  
56  
57  
58  
59  
60

|                            |                                                                       |
|----------------------------|-----------------------------------------------------------------------|
| Secondary Subject Heading: | Infectious diseases, Public health                                    |
| Keywords:                  | PRIMARY CARE, COVID-19, Public health < INFECTIOUS DISEASES, VIROLOGY |
|                            |                                                                       |





I, the Submitting Author has the right to grant and does grant on behalf of all authors of the Work (as defined in the below author licence), an exclusive licence and/or a non-exclusive licence for contributions from authors who are: i) UK Crown employees; ii) where BMJ has agreed a CC-BY licence shall apply, and/or iii) in accordance with the terms applicable for US Federal Government officers or employees acting as part of their official duties; on a worldwide, perpetual, irrevocable, royalty-free basis to BMJ Publishing Group Ltd ("BMJ") its licensees and where the relevant Journal is co-owned by BMJ to the co-owners of the Journal, to publish the Work in this journal and any other BMJ products and to exploit all rights, as set out in our [licence](#).

The Submitting Author accepts and understands that any supply made under these terms is made by BMJ to the Submitting Author unless you are acting as an employee on behalf of your employer or a postgraduate student of an affiliated institution which is paying any applicable article publishing charge ("APC") for Open Access articles. Where the Submitting Author wishes to make the Work available on an Open Access basis (and intends to pay the relevant APC), the terms of reuse of such Open Access shall be governed by a Creative Commons licence – details of these licences and which [Creative Commons](#) licence will apply to this Work are set out in our licence referred to above.

Other than as permitted in any relevant BMJ Author's Self Archiving Policies, I confirm this Work has not been accepted for publication elsewhere, is not being considered for publication elsewhere and does not duplicate material already published. I confirm all authors consent to publication of this Work and authorise the granting of this licence.

1  
2  
3  
4 1 Title: Rapid, early and accurate SARS-CoV-2 detection using RT-PCR in primary care: A  
5 2 prospective cohort study (REAP-1)  
6  
7  
8 3

9 4 Date: March 17, 2021  
10  
11 5

12 6 Version: 3.0  
13  
14 7

15 8 Co-authors  
16  
17 9

18 10 Werner Leber<sup>1,\*,&</sup>  
19  
20 11

21 12 Oliver Lammel<sup>2</sup>  
22  
23 13

24 14 Monika Redlberger-Fritz<sup>3</sup>  
25  
26 15

27 16 Maria Elisabeth Mustafa-Korninger<sup>4</sup>  
28  
29 17

30 18 Reingard Christina Glehr<sup>5</sup>  
31  
32 19

33 20 Jeremy V. Camp<sup>3</sup>  
34  
35 21

36 22 Benedikt Agerer<sup>6</sup>  
37  
38 23

39 24 Alexander Lercher<sup>6</sup>  
40  
41 25

42 26 Alexandra M. Popa<sup>6</sup>  
43  
44 27

45 28 Jakob-Wendelin Genger<sup>6</sup>  
46  
47 29

48 30 Thomas Penz<sup>6</sup>  
49  
50 31

51 32 Stephan Aberle<sup>3</sup>  
52  
53 33

54 34 Christoph Bock<sup>6</sup>  
55  
56 35

57 36 Andreas Bergthaler<sup>6</sup>  
58  
59 37

60 38 Karin Stiasny<sup>3</sup>  
61  
62 39

63 40 Eva-Maria Hochstrasser<sup>2</sup>  
64  
65 41

66 42 Christian Hoellinger<sup>7</sup>  
67  
68 43

69 44 Andrea Siebenhofer<sup>5,8</sup>  
70  
71 45

72 46 Chris Griffiths<sup>1</sup>  
73  
74 47

75 48 Jasmina Panovska-Griffiths<sup>9,10,11,\*,&</sup>  
76  
77 49  
78 50  
79 51  
80 52

1  
2  
3 31 <sup>1</sup> Centre for Clinical Effectiveness and Health Data Science, Institute of Population Health Sciences, Barts School  
4 32 of Medicine and Dentistry, Queen Mary University of London, London, UK

5  
6 33 <sup>2</sup> Practice Dr. Lammel, Ramsau am Dachstein, Austria

7  
8 34 <sup>3</sup> Center for Virology, Medical University of Vienna, Vienna, Austria

9  
10 35 <sup>4</sup> Medizinisch-chemisches Labor Dr. Mustafa, Dr. Richter OG, Salzburg, Austria

11  
12 36 <sup>5</sup> Institute of General Practice and Evidence-based Health Services Research, Medical University of Graz, Graz,  
13 37 Austria

14  
15 38 <sup>6</sup> CeMM Research Center for Molecular Medicine of the Austrian Academy of Sciences, Vienna, Austria

16  
17 39 <sup>7</sup> Paracelsus Medical University, Salzburg, Austria

18  
19 40 <sup>8</sup> Institute of General Practice, Goethe-University Frankfurt am Main, Frankfurt am Main, Germany

20  
21 41 <sup>9</sup> Department of Applied Health Care, Institute of Epidemiology & Health Care, University College London,  
22 42 London

23  
24 43 <sup>10</sup> Institute for Global Health, University College London, London, UK

25  
26 44 <sup>11</sup> The Queen's College, University of Oxford, Oxford, UK

27  
28 45  
29 46 & these authors contributed equally

30  
31 47 \* Corresponding authors: [w.leber@qmul.ac.uk](mailto:w.leber@qmul.ac.uk), [j.panovska-griffiths@ucl.ac.uk](mailto:j.panovska-griffiths@ucl.ac.uk)

32  
33 48  
34  
35  
36 49 **ABSTRACT**

37  
38 50 **Objectives:** We explore the importance of SARS-CoV-2 sentinel surveillance testing in primary care during a  
39 51 regional COVID-19 outbreak in Austria.

40  
41 52 **Design:** Prospective cohort study.

42  
43 53 **Setting:** A single sentinel practice serving 22,829 people in the ski-resort of Schladming-Dachstein.

44  
45 54 **Participants:** All 73 patients presenting with mild-to-moderate flu-like symptoms between 24 February and 03  
46 55 April, 2020.

47  
48 56 **Intervention:** Nasopharyngeal sampling to detect SARS-CoV-2 using real-time reverse transcriptase-polymerase  
49 57 chain reaction (RT-qPCR).

50  
51 58 **Outcome measures:** We compared RT-qPCR at presentation with confirmed antibody status. We split the  
52 59 outbreak in two parts, by halving the period from the first to the last case, to characterise three cohorts of patients  
53 60 with confirmed infection: early acute (RT-qPCR reactive) in the first half; and late acute (reactive) and late  
54 61 convalescent (non-reactive) in the second half. For each cohort we report the number of cases detected, the  
55 62 accuracy of RT-qPCR, the duration and variety of symptoms, and the number of viral clades present.

1  
2  
3 63 **Results:** Twenty-two patients were diagnosed with COVID-19 (8 early acute, 7 late acute and 7 late convalescent),  
4 64 44 patients tested SARS-CoV-2 negative, and 7 were excluded. The sensitivity of RT-qPCR was 100% among all  
5 65 acute cases, dropping to 68.1% when including convalescent. Test specificity was 100%. Mean duration of  
6 66 symptoms for each group were 2 days (range 1-4) among early acute, 4.4 days (1-7) among late acute and 8 days  
7 67 (2-12) among late convalescent. Confirmed infection was associated with loss of taste. Acute infection was  
8 68 associated with loss of taste, nausea/vomiting, breathlessness, sore throat and myalgia; but not anosmia, fever or  
9 69 cough. Transmission clusters of three viral clades (G, GR and L) were identified.

10 68 associated with loss of taste, nausea/vomiting, breathlessness, sore throat and myalgia; but not anosmia, fever or  
11 69 cough. Transmission clusters of three viral clades (G, GR and L) were identified.  
12 70  
13 71 **Conclusions:** RT-qPCR testing in primary care can rapidly and accurately detect SARS-CoV-2 among people  
14 72 with flu-like illness in a heterogenous viral outbreak. Targeted testing in primary care can support national sentinel  
15 73 surveillance of coronavirus.  
16 74

#### 17 74 **Strengths and limitations of this study**

- 18 75 • Our study was conducted in a state-of-the-art sentinel surveillance practice, participating in the Austrian  
19 76 National Influenza Screening Programme, covering the entire period of a regional COVID-19 outbreak.
- 20 77 • Symptomatic patients received same-day appointments with a clinician for nasopharyngeal swabs, and people  
21 78 testing RT-qPCR reactive were notified within 24 hours.
- 22 79 • Cases were confirmed using a combination of five different ELISA platforms and neutralising antibody assay.
- 23 80 • The relatively small patient cohort from a single testing site limits conclusion on causality and generalisability.
- 24 81 • Any difference in symptoms observed between study cohorts may be due to recall bias occurred, particularly  
25 82 among those people presenting late.  
26 83

#### 27 84 **INTRODUCTION**

28 85 The coronavirus 2019 disease (COVID-19) pandemic, caused by severe acute respiratory syndrome coronavirus  
29 86 2 (SARS-CoV-2), continues to spread globally with more than 96 million cases, and over two million deaths  
30 87 reported as of January 22, 2021. Undetected infection and delays in implementing an effective test-trace-isolate  
31 88 (TTI) strategy have contributed to the spread of the virus becoming a pandemic. SARS-CoV-2 virus has a wide  
32 89 spectrum of manifestations including no symptoms (asymptomatic infection), mild to moderate to severe flu-like  
33 90 illness, loss of taste or smell, pneumonia and acute respiratory distress syndrome (ARDS), sepsis, multi-organ  
34 91 failure and death.<sup>1</sup> In studies to date, the reported time for the infection to become symptomatic (incubation period)  
35 92 varies among different cohorts and settings, with a median incubation period around 5.1 days,<sup>2</sup> infectivity starting  
36 93 2.3 days before symptom onset, peaking 1-2 days before that,<sup>3,4</sup> and gradually declining over 7-10 days.<sup>5,6 7</sup>  
37 94

38 95 SARS-CoV-2 has the potential for ‘superspreading’ events, resulting in clusters of disease outbreaks among a  
39 96 large number of people. Most infections remain isolated cases, but a small number of individuals (10%) may  
40 97 cause up to 80% of secondary transmissions.<sup>8</sup> Although symptomatic infection is common (17 %, range 4-41%),  
41 98 the relative risk for symptomatic transmission may be up to six times higher than for asymptomatic infection.<sup>9-11</sup>  
42 99 Undocumented infection may constitute the majority of cases (86%), causing more than half (55%) of all  
43 100 documented infections.<sup>12</sup> Superspreading events have been reported from across the globe, and countries



1  
2  
3 101 achieving early viral suppression took rapid and decisive action to implement comprehensive case identification  
4 102 and testing, combined with contact tracing and isolation.<sup>13,14</sup> For epidemic control of COVID-19, the effective  
5 103 reproduction number,  $R_e$ , needs to be less than 1; the presence of undetected and persistent infection within the  
6 104 population, even if very small, can increase  $R_e$  and induce a secondary peak of infections. Therefore, rapid  
7 105 identification and containment of infection is a key factor for the prevention of onward transmission and  
8 106 controlling the virus to protect the public.<sup>15</sup>

9  
10  
11  
12 107  
13  
14 108 In Austria, the first two COVID-19 cases were reported among travelers from Italy in the city of Innsbruck on  
15 109 February 25, 2020.<sup>16</sup> Multiple superspreading events then occurred among tourists visiting Austrian ski-resorts,  
16 110 including the town of Ischgl, that are believed to have led to further outbreaks in the tourists' home countries,  
17 111 including Germany, Denmark and Sweden.<sup>16,17</sup> Austria was one of the first countries to adopt comprehensive  
18 112 lockdown measures on March 16, 2020, including protection of vulnerable groups, penalty fees for breaching  
19 113 self-isolation, and a national health hotline to facilitate testing at acute care settings and *via* mobile units.<sup>18</sup> The  
20 114 first death from COVID-19 associated complications occurred on March 12, 2020, and as of January 21, 403.512  
21 115 cases and 7.389 COVID-19 related deaths have been reported.

22  
23  
24  
25  
26 116  
27  
28 117 General practice (GP) is considered a key partner in case recording, managing high-risk groups and delivery of  
29 118 equitable care.<sup>19-21</sup> The European Centre for Disease Prevention and Control (ECDC) recommended integration  
30 119 of "COVID-19 surveillance with sentinel surveillance of influenza-like illness or acute respiratory infection."<sup>22</sup>  
31 120 However, in some countries, like the UK and the USA, primary care has been largely excluded from the national  
32 121 TTI strategy.<sup>23</sup> In contrast, Austria additionally offered SARS-CoV-2 real-time reverse transcriptase-polymerase  
33 122 chain reaction (RT-qPCR) testing to people presenting with mild to moderate flu-like symptoms to any of the 92  
34 123 sentinel surveillance sites (GPs and paediatric practices) beginning February 24, 2020.<sup>24</sup> The new service  
35 124 supplemented the existing national health hotline for people at risk of COVID-19.<sup>25</sup> RT-qPCR is an established  
36 125 technique to detect viral RNA from nasopharyngeal sampling used to diagnose COVID-19.<sup>26</sup> Early detection of  
37 126 SARS-CoV-2 is essential for effective contact tracing,<sup>27</sup> and whole genome sequencing may provide data on  
38 127 dynamics of transmission.<sup>17,28</sup>

39  
40  
41  
42  
43  
44 128  
45  
46 129 The overall aim of this work is to test whether rapid early RT-qPCR testing in primary care can accurately and  
47 130 timely detect SARS-CoV-2, and inform outbreak surveillance. To attest this, we report the outcomes of SARS-  
48 131 CoV-2 RT-qPCR testing at a sentinel GP in the ski-resort of Schladming-Dachstein, Austria. We report a) the  
49 132 accuracy (via sensitivity and specificity) of rapidly deployed RT-qPCR testing in patients presenting with acute  
50 133 infection by comparing it to anti-SARS-CoV-2 antibody status during convalescence in the same geographically  
51 134 defined study cohort; b) the earliness of viral RNA detection by comparing the duration, number and type of  
52 135 symptoms among patients presenting during the first half (early presenters) and the second half (late presenters)  
53 136 of the outbreak, measured by the number of days from the first to the last case detected and dividing that period  
54 137 by two; c) the identification of key clinical symptoms of acute and convalescent disease and determine a  
55 138 correlation between these; and d) the number of SARS-CoV-2 clades implicated in the outbreak.

139

## METHODS

### Setting

This study was set in a sentinel GP participating in the National Influenza Surveillance Network in the ski-resort of Schladming-Dachstein, political subdistrict of Groebming (population 22,829), Austria. The study was conducted during a local COVID-19 outbreak in March and April 2020, during which 29 cases were detected by RT-qPCR locally. The bulk of the outbreak occurred after a 3-day party (March 13-15) prior to implementation of the national lockdown policy on March 16, which led to premature termination of the skiing season. All patients presenting with mild to moderate flu-like illness were included. Following the report of the first cases in Austria, people with flu-like symptoms were advised to call the national health hotline instead of directly presenting to the hospital or GP. Patients were advised to phone the GP or receive in-home testing by mobile testing units, and home self-isolate and self-care. Asymptomatic people were excluded from this study.

151

### Design

We conducted a longitudinal evaluation comprising a prospective cohort to examine the impact of SARS-Cov-2 RT-qPCR testing on COVID-19 case detection. Between February 24 and April 03, 2020, RT-qPCR testing and seropositivity data were collected to compare two groups within this cohort of patients:

- Patients testing RT-qPCR reactive at presentation with acute disease
- Patients confirmed anti-SARS-CoV-2 antibody positive during the convalescence phase (confirmed infection).

We define acute disease as the presence of flu-like symptoms combined with reactive SARS-CoV-2 RT-qPCR and positive serostatus; and confirmed infection as the presence of convalescent anti-SARS-CoV-2 antibody 3-6 weeks after the acute illness, irrespective of the RT-qPCR result.

161

### Intervention

On February 24, 2020, one day before the first two cases were reported in Austria, the National Influenza Screening Network was enhanced to include SARS-CoV-2 RT-qPCR testing.

Patients with mild to moderate flu-like symptoms calling the study sentinel GP were offered same day appointments for SARS-CoV-2 RT-qPCR testing. RT-qPCR results were available within 24 hours, and those patients with a reactive outcome were immediately notified by a clinician and advised to self-isolate for a minimum of two weeks following national policy at that time. Repeat follow-up RT-qPCR was arranged by the local public health authority (District Commissioner of Liezen, Austria), and people testing non-reactive on repeat RT-qPCR were released from self-isolation. After 3-6 weeks, venous blood was obtained to confirm SARS-CoV-2 infection using ELISA IgG and neutralizing antibody assay. We defined the period of the outbreak as the number of days from the first patient to the last patient testing RT-qPCR reactive at the GP.

173

1  
2  
3 174 Since the winter season 2000/2001, the National Influenza Screening Network has conducted influenza screening  
4 175 for patients attending sentinel GPs and paediatric practices. Between November and March of each year,  
5 176 participating practices routinely collect nasopharyngeal swabs from patients presenting with flu-like symptoms.  
6 177 Specimens are sent to the Center for Virology, Medical University of Vienna, Austria, for virus isolation on tissue  
7 178 cultures and PCR detection. This surveillance programme allows for near real-time recording of seasonal  
8 179 influenza virus activity in the country.

### 12 180 **Clinical data**

14 181 We obtained anonymous patient data held within the GP computer system. The practice lead clinician (OL)  
15 182 generated a clinical master case report form before extracting pseudonymised patient records into an Excel  
16 183 spreadsheet. EMH and CH verified the accuracy of the data extraction for all patients. Data were stored on a  
17 184 secure computer at the Institute of General Practice and Evidence-based Health Services Research, University of  
18 185 Graz, Austria, before sharing it with the study statistician (JPG) using encrypted email and secure storage at the  
19 186 University of Oxford, UK.

23 187

### 25 188 **Testing**

#### 27 189 RT-qPCR

28 190 SARS-CoV-2 RT-qPCR was performed in scope of the routine surveillance at the Center for Virology, Medical  
29 191 University of Vienna on a Roche LightCycler (<http://www.roche.com>; Switzerland) using a primer-set provided  
30 192 by TIB MOLBIOL (<https://www.tib-molbiol.com/>; Germany).<sup>26</sup> RT-qPCR targeting the E-gene was considered  
31 193 reactive at a cycle threshold (Ct) value of less than 40, and Ct values above 32 were confirmed by RNA-dependent  
32 194 RNA polymerase (RdRP) gene detection.

#### 36 195 Enzyme linked immune assays (ELISA)

37 196 IgG serostatus assays were performed according to the manufacturers' protocol using five different commercial  
38 197 test kits of Anti-SARS-CoV-2 IgG enzyme immune linked assays (ELISA) provided by the following companies:  
39 198 EUROIMMUN (EUROIMMUN Medizinische Labordiagnostika AG, [www.euroimmun.com](http://www.euroimmun.com)),<sup>29</sup> and EPITOPE  
40 199 DIAGNOSTICS (Immunodiagnostik AG [www.euroimmun.com](http://www.euroimmun.com)) respectively.<sup>30</sup> Reagent wells of the Anti-  
41 200 SARS-CoV-2 IgG ELISA are coated with recombinant antigen derived from the spike protein (S1 domain) of  
42 201 SARS-CoV-2. Reagent wells of the EDI<sup>TM</sup> Novel Coronavirus COVID-19 IgG ELISA are coated with COVID-  
43 202 19 recombinant full length nucleocapsid protein. ABBOTT performed on the Architect platform (ABBOTT  
44 203 LABORATORIES INC., [www.abbott.com](http://www.abbott.com)), DIASORIN (DIASORIN S.p.A, <https://www.diasorin.com/home>)  
45 204 performed on the LIAISON® platform and ROCHE performed on the cobas e 801 analyzer. The Abbott SARS-  
46 205 CoV-2 IgG assay is a chemiluminescent microparticle immunoassay (CMIA) for the qualitative detection of IgG  
47 206 against a recombinant SARS-CoV-2 nucleoprotein. Results are reported in form of an index value (S/C).  
48 207 LIAISON® SARS-CoV-2 S1/S2 IgG assay is a chemiluminescence immunoassay (CLIA) for the quantitative  
49 208 detection of IgG against the recombinant S1 and S2 domain of the spike protein. Results are reported in arbitrary  
50 209 units (AU/mL). Elecsys® Anti-SARS-CoV-2 assay (Roche Diagnostics) is a electrochemiluminescence  
51 210 immunoassay (ECLIA) for qualitative detection of SARS-CoV-2 antibodies in human serum against a  
52 211 recombinant nucleocapsid protein of SARS-CoV-2. It is a total antibody assay not differentiating between IgA,

212 IgM or IgG but detecting IgG predominantly. Results are reported as numeric values in form of signal  
213 sample/cutoff (COI).

214 Neutralising antibody assay

215 Samples with discordant antibody results (see below) were further evaluated using an in-house neutralising  
216 antibody assay as follows: Serial dilutions of heat-inactivated serum samples were incubated with 50-100 TCID<sub>50</sub>  
217 SARS-CoV-2 (hCoV-19/Austria/CeMM0360/2020; GISAID EPI\_ISL: 438123) for 1h at 37 °C. The mixture was  
218 added to Vero E6 (ATCC ® CRL-1586) cell monolayers and incubation was continued for two to three days. NT  
219 titers were expressed as the reciprocal of the serum dilution that protected against virus-induced cytopathic effects.  
220 NT titers  $\geq 10$  were considered positive. The study has been reported in accordance with STARI reporting  
221 guidelines for implementation studies.<sup>31</sup>

222

### 223 **Outcome measures and statistical analysis**

224 We present a descriptive statistics of patient demographics including age, gender and ethnicity; and the following  
225 four testing, viral and genomic outcomes:

226 **Outcome A:** The diagnostic accuracy (using sensitivity and specificity) of SARS-CoV-2 RT-qPCR among  
227 patients with mild to moderate flu-like symptoms at presentation by comparing molecular diagnosis with anti-  
228 SARS-CoV-2 antibody testing during convalescence, and hospital admission and death, including any alternative  
229 diagnoses for patients testing SARS-CoV-2 negative. To determine the accuracy of RT-qPCR, we stratified RT-  
230 qPCR results in four groups: true reactive (RT-qPCR reactive and confirmed antibody positive); false reactive  
231 (RT-qPCR reactive, antibody negative); true non-reactive (RT-qPCR non-reactive, antibody negative); and false  
232 non-reactive (RT-qPCR non-reactive, antibody positive).

233 **Outcome B:** The earliness of RT-qPCR testing by comparing the duration and number of symptoms during the  
234 first half of the outbreak (early presenters) and during the second half of the outbreak (late presenters). We  
235 calculated the earliness of RT-qPCR testing by determining the mean duration of symptoms, in days (range), and  
236 mean number of symptoms (range), across the three cohorts of patients with confirmed infection: early acute, late  
237 acute and late convalescent. The three cohorts were obtained by stratifying people with confirmed infection  
238 according to the date of presentation to the GP during the outbreak as follows: people presenting with acute  
239 infection (RT-qPCR reactive, confirmed antibody positive) during the first half of the outbreak (early acute  
240 disease) vs. those people presenting during the second half of the outbreak (late acute); and those people presenting  
241 with previous disease (RT-qPCR non-reactive but confirmed antibody positive) in the second half of the outbreak  
242 (late convalescent).

243 **Outcome C:** The key clinical symptoms associated with RT-qPCR reactivity (acute infection) and convalescent  
244 sero-positivity (confirmed infection) to determine any potential correlation between these stages of disease. We  
245 used multivariate logistic regression tested the association of 15 clinical symptoms with RT-qPCR reactivity at  
246 presentation and among all patients with confirmed infection. We reported the odds ratios (ORs) and the  
247 significance value ( $p$ ) of each covariate on testing RT-qPCR reactive, and confirmed positive antibody status  
248 respectively. We quantified the association between patients with reactive RT-qPCR (and confirmed antibody

249 positive) and all patients with confirmed infection by calculating the correlation coefficient  $r$ , and estimating the  
250 95% CI.

251 **Outcome D:** The number of viral clades implicated in the outbreak. To do this, SARS-CoV-2 full genome  
252 sequencing was undertaken as part of a wider study covering the whole of Austria.<sup>17,28</sup> The full-length sequences  
253 were matched to patient records by an anonymized unique identifier and uploaded to the Global Initiative on  
254 Sharing All Influenza Data (GISAID) database (<http://gisaid.org>).<sup>32</sup> Sequences were aligned in MEGA7 and non-  
255 synonymous nucleotide variants were identified to determine the respective clades, following the GISAID  
256 classification scheme for lineages.<sup>33</sup>

## 257 258 RESULTS

### 259 Overall testing results

260 Baseline characteristics for confirmed cases were similar for sex, age, and ethnic origin (Table 1). All patients  
261 were local residents and no endemic cases were documented among tourists. Figure 1 shows the flow-chart for  
262 the patient cohorts of this study. 73 patients presented with mild to moderate flu-like illness, all of whom received  
263 SARS-CoV-2 RT-qPCR (and influenza qPCR). Of those, 16 (21.9%) tested RT-qPCR reactive and 57 (78.1%)  
264 tested non-reactive, including four that tested influenza PCR reactive. Due to lack of venous blood sampling  
265 (obtained 3-6 weeks after initial presentation), antibody data was not available for 7 patients (1 RT-qPCR reactive  
266 vs. 6 non-reactive) that were excluded from this analysis. Therefore, of the 66 patients included in this analysis,  
267 22 patients (33.3%) had SARS-CoV-2 infection confirmed by antibody testing and 44 (66.7%) patients were  
268 confirmed seronegative. Of the former, eight patients (early acute presenters) presented in the first half of the  
269 outbreak (12 days from March 11 to 22, 2020) and 14 patients presented in the second half (March 23 to April  
270 03, 2020); of the latter, seven patients were late acute and seven late convalescent (Figure 2A). Alternative  
271 diagnoses of the 44 patients who tested SARS-CoV-2 negative included: influenza and infectious mononucleosis  
272 (N=2, each); bacterial tonsillitis, bacterial pneumonia, bronchitis and exacerbation of chronic obstructive  
273 pulmonary disease (COPD) (N=1, each) (see flow-chart, Figure 1). No hospital admissions or deaths were  
274 reported.

275 **Table 1: Summary of the demographic characteristics of COVID-19 cases.**

|             | People with confirmed infection<br>(seropositive, any RT-qPCR result)<br>(N=22) | People with acute infection<br>(RT-qPCR reactive and seropositive)<br>(N=15) |
|-------------|---------------------------------------------------------------------------------|------------------------------------------------------------------------------|
| Sex         |                                                                                 |                                                                              |
| Female      | 14 (63.6%)                                                                      | 9 (60%)                                                                      |
| Male        | 8 (36.4%)                                                                       | 6 (40%)                                                                      |
| Age (years) |                                                                                 |                                                                              |
| 16-24       | 4 (26.7%)                                                                       | 3 (20%)                                                                      |

|               |           |           |
|---------------|-----------|-----------|
| 25-34         | 4 (26.7%) | 2 (13.3%) |
| 35-49         | 6 (40%)   | 4 (26.7%) |
| >50           | 8 (36.4%) | 6 (40%)   |
| Ethnic origin |           |           |
| White         | 22 (100%) | 15 (100%) |

276

### 277 **Specificity and sensitivity of RT-qPCR**

278 In the absence of a gold standard, we used a consensus statement on serostatus, irrespective of RT-qPCR  
 279 outcomes, to establish whether an infection had occurred. We considered an infection as confirmed in any patient  
 280 who tested IgG ELISA positive on all five screening platforms (concordant results) or in any patient with  
 281 mismatch between ELISA test results (discordant results) but positive neutralising antibody assay (see flow-chart,  
 282 Figure 1). Of the 15 patients with reactive RT-qPCR, sera from nine patients were concordant positive and six  
 283 were discordant; and of the 53 patients with non-reactive RT-qPCR, sera from 41 patients were concordant  
 284 negative, 5 were concordant positive, and three were discordant. Sera from two patients diagnosed with influenza  
 285 who tested RT-qPCR non-reactive were concordant negative and included in this analysis. For the nine patients  
 286 with discordant results, we used neutralising antibody assay to confirm infection status. All patients (N=6) with  
 287 reactive RT-qPCR were neutralising antibody positive; and of the three patients with non-reactive RT-qPCR, two  
 288 were neutralising antibody positive, and one was negative. Therefore, overall, when combining ELISA and  
 289 neutralising antibody assay, 22 patients had confirmed infection, of whom 15 patients were RT-qPCR reactive  
 290 (true reactive) and seven were non-reactive (false non-reactive). There were no false reactive RT-qPCR results.  
 291 Therefore, RT-qPCR correctly identified infection in 15/22 patients (overall sensitivity of 68.1%). Sensitivity of  
 292 RT-qPCR among all acute (early and late) presenters and during the first half of the outbreak was high (100%),  
 293 but dropped to 50% in the second half of the outbreak. RT-qPCR correctly identified absence of infection for all  
 294 44 patients testing antibody negative (true non-reactive) indicating specificity of 100%.

295

### 296 **Earliness of RT-qPCR testing**

297 The mean duration of symptoms was 2 days (range 1-4) among early acute presenters, 4.4 days (range 1-7) among  
 298 late acute presenters, 8 days (range 2-12) among people with late convalescent infection, and 3.9 days (range 1-  
 299 14) among non-COVID-19 controls (Figure 2B). The mean number of symptoms was 6.75 (range 4-9) among  
 300 early acute presenters, 6.86 (3-12) among late acute presenters, 6.3 (1-11) among people with convalescent  
 301 infection, and 5.23 (range 2-11) among non-COVID-19 controls (Figure 2C).

302

### 303 **Regression analysis on confirmed infection**

304 Multivariate regression on all 66 patients, including 22 (31.9%) with confirmed infection, suggested that loss of  
 305 taste, but not loss of smell, was the key covariate significantly associated with positive serostatus (ORs=6.03;

306 p=0.047) (Table 2). Breathlessness (OR=6.9, p=0.054) and cough (OR=0.12, p=0.053) were also possible  
 307 covariates of confirmed infection.

308 **Table 2: Regression analysis on symptoms reported by patients diagnosed with COVID-19.**

| Clinical symptom | People with confirmed infection (seropositive, any RT-qPCR result) (N=22) |               |         | People with acute disease (RT-qPCR reactive and seropositive) (N=15) |                 |         |
|------------------|---------------------------------------------------------------------------|---------------|---------|----------------------------------------------------------------------|-----------------|---------|
|                  | Odds ratio                                                                | 95% CI        | p-value | Odds ratio                                                           | 95% CI          | p-value |
| Change in taste  | 6.02                                                                      | (1.02,35.51)  | 0.047   | 571.72                                                               | (1.92,170629.2) | 0.029   |
| Nausea/vomiting  | 4.42                                                                      | (0.748,26.09) | 0.101   | 370.11                                                               | (2.71,50429.42) | 0.018   |
| Sore throat      | 0.36                                                                      | (0.067,1.93)  | 0.233   | 0.002                                                                | (0.000006,0.74) | 0.039   |
| Myalgia          | 1.15                                                                      | (0.24,5.51)   | 0.865   | 121.82                                                               | (1.52,9749.08)  | 0.032   |
| Breathlessness   | 6.90                                                                      | (0.96,49.40)  | 0.054   | 134.46                                                               | (1.02,17796.87) | 0.049   |
| Change in smell  | 0.77                                                                      | (0.098,6.15)  | 0.811   | 0.37                                                                 | (0.008,15.87)   | 0.607   |
| Fever            | 2.97                                                                      | (0.44,20.35)  | 0.266   | 1.44                                                                 | (0.057,36.66)   | 0.825   |
| Cough            | 0.12                                                                      | (0.014,1.03)  | 0.053   | 0.011                                                                | (0.00008,1.42)  | 0.069   |

309 **Caption to Table 2:** Symptoms associated with confirmed SARS-CoV-2 infection (antibody confirmed positive,  
 310 irrespective of RT-qPCR result) among 22 patients, and with acute infection (RT-qPCR reactive, antibody  
 311 confirmed positive) among 15 patients respectively.

### 313 Regression analysis on acute disease

314 All 15 patients with acute disease reported fatigue and therefore this covariate was removed from the analysis;  
 315 and observations from two patients with non-reactive RT-qPCR, who did not report fatigue, were also removed  
 316 (Table 2). The multivariate logistic regression on the remaining 66 patients showed that the following covariates  
 317 were associated with acute disease: loss of taste (OR=571.72; p=0.029), nausea and vomiting (OR=370.11;  
 318 p=0.018), breathlessness (OR=134.46; p=0.049), myalgia (OR=121.82; p=0.032) and sore throat (OR=0.002,  
 319 p=0.039); and but not loss of smell (OR=0.37, p=0.607), fever (OR=1.44, p=0.825) or cough (OR=0.01,  
 320 p=0.069).

### 322 Correlation between acute and confirmed infection

323 Testing RT-qPCR reactive was correlated with testing seropositive for COVID-19 infection ( $r=0.77$ , 95%CI  
 324 0.65~0.89). Among early and acute presenters, the correlation between the two tests was perfect (green and amber  
 325 in Figure 2D), irrespective of the stage of the outbreak; whereas in the second half of the outbreak, RT-qPCR did  
 326 not detect any case with convalescent infection (red curve on Figure 2D).

327

328 **Viral clade analysis**

329 Thirteen of 15 full-length genome sequences were available for clade analysis via GISAID (Table 3); and two  
 330 sequences were not available at the time of analysis. Lineages of SARS-CoV-2 have been identified based on  
 331 mutations in key amino acid positions.<sup>33</sup> Clade G is defined by the mutations D614G, C241T, C3037T and  
 332 A23403G in the Spike protein; and clade GR by additional RG203KR mutations in the Nucleocapsid protein N;  
 333 clade L is most closely related to the Wuhan reference strain (NC\_045512.2).<sup>34</sup> Accordingly, among the 13 viral  
 334 isolates, three different clades were identified, including clade L (N=2), GR (N=4) and L (N=7).

335 **Table 3: Genomic sequences accessed via GISAID listing key amino acid locations used for SARS-CoV-2**  
 336 **classification.**

| Disease Classification | Virus Name (GISAID)           | EPI_ISL_# | Date of RT-qPCR | Lineage    | ORF 8: 84 | ORF3a: 57 | S:614* | N:203** | N:204** |
|------------------------|-------------------------------|-----------|-----------------|------------|-----------|-----------|--------|---------|---------|
| Early acute            | hCoV-19/Austria/CeMM0191/2020 | 438032    | 13/03/2020      | B(L)       | L         | Q         | D      | R       | G       |
| Early acute            | hCoV-19/Austria/CeMM0248/2020 | 438078    | 21/03/2020      | B (L)      | L         | Q         | D      | R       | G       |
| Early acute            | hCoV-19/Austria/CeMM0018/2020 | 419671    | 19/03/2020      | B.1.1 (GR) | L         | Q         | G      | K       | R       |
| Early acute            | hCoV-19/Austria/CeMM0228/2020 | 438061    | 18/03/2020      | B.1.1 (GR) | L         | Q         | G      | K       | R       |
| Early acute            | hCoV-19/Austria/CeMM0235/2020 | 438066    | 19/03/2020      | B.1.1 (GR) | L         | Q         | G      | K       | R       |
| Early acute            | hCoV-19/Austria/CeMM0250/2020 | 438080    | 21/03/2020      | B.1.1 (GR) | L         | Q         | G      | K       | R       |
| Early acute            | hCoV-19/Austria/CeMM0222/2020 | 438056    | 17/03/2020      | B.1.8 (G)  | L         | Q         | G      | R       | G       |
| Early acute            | hCoV-19/Austria/CeMM0249/2020 | 438079    | 21/03/2020      | B.1.8 (G)  | L         | Q         | G      | R       | G       |
| Late acute             | hCoV-19/Austria/CeMM0267/2020 | 438096    | 24/03/2020      | B.1.8 (G)  | L         | Q         | G      | R       | G       |
| Late acute             | hCoV-19/Austria/CeMM0276/2020 | 438103    | 25/03/2020      | B.1.8 (G)  | L         | Q         | G      | R       | G       |
| Late acute             | hCoV-19/Austria/CeMM0303/2020 | 475778    | 29/03/2020      | B.1.8 (G)  | L         | Q         | G      | R       | G       |
| Late acute             | hCoV-19/Austria/CeMM0324/2020 | 475794    | 01/04/2020      | B.1.8 (G)  | L         | Q         | G      | R       | G       |
| Late acute             | hCoV-19/Austria/CeMM0337/2020 | 475800    | 03/04/2020      | B.1.8 (G)  | L         | Q         | G      | R       | G       |

337 **Caption Table 3:** SARS-CoV-2 clades are classified by The Global Initiative on Sharing All Influenza Data  
 338 (GISAID) using specific non-synonymous mutations in the viral genome. Clade G is defined by the mutations  
 339 D614G, C241T, C3037T and A23403G in the Spike protein; and clade GR by additional RG203KR mutations in  
 340 the Nucleocapsid protein N; clade L is most closely related to the Wuhan reference strain (NC\_045512.2).<sup>34</sup> Whole  
 341 genome data were available for 13/15 sequences; data for two sequences were not available at the time of analysis.  
 342 Accordingly, among the 13 sequences analysed, three different clades were identified, including clades L (N=2),  
 343 GR (N=4) and G (N=7). All three clades were detected in early acute infection, and clade G was additionally  
 344 detected in late acute infection. \*For simplicity reasons, only mutation D614G (grey background) in the Spike  
 345 protein defining clade G is shown. \*\*Additional mutations R203K and G204R in the Nucleocapsid protein N  
 346 defining clade GR are also shown in grey. ORF, open reading frame.

347

348 **DISCUSSION**

349 Our results demonstrate that SARS-CoV-2 RT-qPCR testing, when added to a national influenza surveillance  
 350 programme in primary care, can rapidly, early and accurately diagnose COVID-19 during an outbreak. Of the 73



1  
2  
3 351 patients presenting to the sentinel GP, 22 were diagnosed with COVID-19, including 15 patients with acute  
4 352 disease and seven with late convalescent infection respectively. The sensitivity and specificity of RT-qPCR were  
5 353 68.1% and 100%, but testing RT-qPCR reactive showed perfect correlation with seropositivity during the first  
6 354 half of the outbreak and among early acute (N=8 patients) and late acute presenters (N=7). Strikingly, the mean  
7 355 duration of symptoms of early presenters (2 days) was less than half of late acute presenters (4.4 days) and a  
8 356 quarter of late convalescent presenters (8 days). These findings highlight the need to undertake RT-qPCR testing  
9 357 rapidly and early as soon as symptoms occur. Acute infection was strongly associated with multiple symptoms,  
10 358 including loss of taste, nausea and vomiting, breathlessness, myalgia and sore throat; but loss of smell, fever and  
11 359 cough were not. Surprisingly, loss of taste, but not any other clinical symptom, was significantly associated with  
12 360 convalescent infection. Finally, viral genome analysis demonstrated the presence of three major SARS-CoV-2  
13 361 clades during the outbreak, suggesting that the outbreak was the result of independent transmission chains.  
14  
15  
16  
17  
18  
19 362

20 363 Overall our findings help untangle COVID-19 infection during an outbreak in a ski-resort in Austria. Our results  
21 364 suggest that acute COVID-19 may be associated with a spectrum of symptoms and presence of multiple strains  
22 365 within one setting. This highlights the heterogeneity of coronavirus and the importance in containing outbreaks  
23 366 early before spread. While effective test-trace-isolate (TTI) strategies have been suggested as the key to containing  
24 367 the outbreak without intermittent lockdowns,<sup>35</sup> we suggest that systemic changes may also be needed. For  
25 368 example, behavioral changes, such as large-scale gathering of people in closed spaces has to be avoided as they  
26 369 may trigger emergence of individual clusters to form a superspreading event. Keeping a level of compliance to  
27 370 social distancing and reduced physical contacts is necessary to prevent any future wave. Enhanced testing is an  
28 371 important factor, and our study suggests that testing in primary care at symptom onset is highly accurate and  
29 372 should be something that governments should consider as an additional strategy.  
30  
31  
32  
33  
34  
35 373

36 374 Loss of taste of smell has been recognised as an important marker of COVID-19;<sup>36,37</sup> however, more than half of  
37 375 patients reported olfactory dysfunction after the onset of other symptoms when sensitivity of RT-qPCR may be  
38 376 reduced.<sup>38</sup> Furthermore, loss of taste could not be objectively confirmed in one third of people<sup>38</sup> suggesting self-  
39 377 assessment using a mobile phone application may not be as accurate as clinician-initiated RT-qPCR testing of  
40 378 people presenting with acute disease.<sup>39</sup> Timely and accurate testing is also a prerequisite for effective contact  
41 379 tracing.<sup>27</sup>  
42  
43  
44  
45  
46 380

47 381 The outbreak we explored occurred after a three-day party (March 13-15) just before the skiing season was  
48 382 brought to a premature end due to the Austrian national lockdown measures on March 16. The index case was  
49 383 diagnosed on March 11 and the first secondary cases were reported two days after the celebrations. Therefore, it  
50 384 is possible that the outbreak we are describing here could be a possible superspreading event. Superspreading  
51 385 events have been associated with high intensity aerosol producing activities (shouting, singing) in confined spaces  
52 386 and potentially, the lockdown party might have triggered the local outbreak. The two acute disease clusters  
53 387 observed in this study may represent different types of viral exposure. First, inhalation of high-density aerosols at  
54 388 the party causing acute illness among early presenters and second, low level home transmission of party goers to  
55 389 (late presenting) friends and family during the lockdown. In our study, no COVID-19 cases were observed among  
56 390 children (persons <18 years of age), suggesting that any infected children may have remained asymptomatic or  
57  
58  
59  
60

1  
2  
3 391 did not attend the practice because of mild disease.<sup>40</sup> No further endemic cases were detected after the outbreak.  
4 392 This suggests that combination prevention including rapid testing and case notification in primary care, contact  
5 393 tracing and isolation, and lockdown measures can effectively terminate an outbreak. To our knowledge, our study  
6 394 is the first to demonstrate that the ECDC policy of additional COVID-19 screening at national influenza screening  
7 395 sites can effectively detect and control a regional outbreak.<sup>22</sup>  
8  
9  
10

11 396  
12  
13 397 Our study has many strengths. Our study was enabled by data from a well-established sentinel GP, participating  
14 398 in the National Influenza Screening Programme, covering the entire area of the outbreak. Importantly, national  
15 399 SARS-CoV-2 screening was adopted early, starting the day before the first two cases were reported in Austria;  
16 400 and 16 of 29 cases documented in the Schladming-Dachstein region, including the first and the last case, were  
17 401 detected at the sentinel GP. RT-qPCR testing was rapidly deployed by offering same day GP appointments, and  
18 402 result reporting and case notification within 24 hours. Rapid adoption of new commercial antibody platforms (Lab  
19 403 Mustafa, Salzburg) and in-house neutralising antibody testing assay (Medical University of Vienna) enabled  
20 404 accurate interpretation of RT-qPCR results.  
21  
22  
23  
24

25 405  
26 406 There are some limitations of our study. We used a relatively small patient cohort from a single sentinel GP,  
27 407 potentially limiting conclusions on causality and generalisability of our finding to other areas excluding seven  
28 408 patients for whom COVID-19 serostatus were not available. Lack of association with high fever and cough in our  
29 409 COVID-19 cohort may be due to the national health hotline directing patients with more severe disease to attend  
30 410 emergency service. Therefore, people with these symptoms might have preferred to attend acute services rather  
31 411 than the GP. Although we collected data prospectively, recall bias cannot be excluded. This could be suggested  
32 412 by the lack of association of symptoms of acute infection (nausea and vomiting, breathless and myalgia) among  
33 413 all people confirmed with infection (when including those with negative RT-qPCR), compared to those people  
34 414 presenting early (reactive RT-qPCR). Specific recall bias of taste is less likely, as it featured in both groups and  
35 415 data collection was completed prior to publication of the first systematic review of altered taste and smell in the  
36 416 media.<sup>41</sup> However, change or loss in smell/taste were not quantified using an established tool such as the visual  
37 417 analogue scale (VAS),<sup>42,43</sup> but rather assessed by simple “yes” and “no” answers using a standard clinical  
38 418 questionnaire, potentially leading to response style bias. Although asymptomatic infection is common,<sup>10</sup>  
39 419 asymptomatic people were excluded from this study as we were focusing on symptom-driven presentation. This  
40 420 potentially excludes an important segment of the infected population and future studies will focus on exploring  
41 421 this further. The presence of three viral clades within the outbreak suggests heterogeneity of the virus, but we  
42 422 have not explored this aspect in great details in this study, as this was beyond the scope of this work. In fact, the  
43 423 data presented here is part of the ongoing work untangling the phylogeny of SARS-CoV-2 clades in Austria and  
44 424 their worldwide spread.<sup>28</sup>  
45  
46  
47  
48  
49  
50  
51  
52  
53

54 425  
55  
56 426 To our knowledge, this is the first study to show that primary care can contribute to early case detection and  
57 427 termination of a SARS-CoV-2 outbreak in the community. Our study has important implications for patients,  
58 428 public health, and health systems; nationally and internationally for outbreak epidemiology and control. As  
59  
60

1  
2  
3 429 countries enter the viral suppression phase, early detection will be crucial in the prevention and control of the  
4 430 disease. Early testing at onset of disease, followed by timely contact tracing and case isolation of secondary cases  
5 431 should prevent onward transmission and reduce the reproduction number  $R_e$  below 1. Austria has increased the  
6 432 number of its sentinel sites from 91 to 231 due to COVID-19, indicating that primary care has become an essential  
7 433 partner in a comprehensive surveillance strategy for disease prevention and control. Clade analysis could greatly  
8 434 enhance public health surveillance in the UK where only three quarters of contact tracing is being completed.<sup>44</sup>  
9 435 Key priorities for future research include systematic prospective quantitative and qualitative evaluation of the  
10 436 Austrian National SARS-CoV-2 screening programme during the seasonal influenza season, and generalisability  
11 437 of the intervention in multi-ethnic inner-city settings including genomic analysis using deep viral genome  
12 438 sequencing to support complex contact tracing, and adaption of the REAP-1 protocol to include SARS-CoV-2  
13 439 lateral flow antigen testing.  
14  
15  
16  
17  
18  
19  
20  
21

## 22 441 CONCLUSIONS

23 442 RT-qPCR testing in primary care can rapidly and accurately detect SARS-CoV-2 among people presenting with  
24 443 mild-to-moderate illness in a heterogeneous viral community outbreak. This study demonstrates high rates of  
25 444 accurate and early viral detection associated with symptomatic testing in primary care during a COVID-19  
26 445 outbreak, which is required for an effective TTI strategy. Targeted testing in primary care can support national  
27 446 sentinel surveillance of coronavirus.  
28  
29  
30  
31  
32

33 448 **Authors' Contributions:** WL, OL, MRF, MEMK, EMH, CH and JPG contributed to the design of the study.  
34 449 OL and EMH took nasopharyngeal swabs. OL, EMH and CH maintained the clinical data base. AS and RG  
35 450 submitted the ethics application. MRF provided RT-qPCR data; BA, AL, AMP, JWG, TP, SA, CB and AB; and  
36 451 JVC conducted clade analysis, MEMK produced ELISA data, KS performed the neutralising antibody assay.  
37 452 JPG and WL conducted the statistical analysis. WL and JPG wrote the manuscript with contributions from OL,  
38 453 MRF, MEMK, RCG, JVC, CB, AB, KS, EMH, CH, AS and CG. All authors read and approved the final  
39 454 version.  
40  
41  
42

43 455 **Acknowledgments:** We thank Evelyn Marktl for daily updates on the Christian Drosten's COVID-19 podcast  
44 456 (<https://www.ndr.de/nachrichten/info/podcast4684.html>). We are grateful to the team of Praxis Dr Lammel for  
45 457 their contributions, and in particular to the nurse Sabine Roiderer for providing direct patient care and help with  
46 458 administration. We thank the patients of Schladming-Dachstein for participating in the study.  
47  
48  
49

50 459 **Funding:** This research was self-funded by each individual co-author. This project received funding from the  
51 460 Vienna Science and Technology Fund (WWTF) as part of the WWTF COVID-19 Rapid Response Funding  
52 461 2020. Award/Grant number is not applicable.  
53

54 462 **Ethics approval:** The study used secondary anonymised data for which approval was granted by the University  
55 463 of Graz Research Ethics Committee, Austria (reference number: 32-429 ex 19/20).  
56

57 464 **Patient consent for publication:** Verbal consent was received from patients for study participation.  
58  
59  
60

1  
2  
3 466 **Patient and public involvement:** No patient involvement.

4  
5 467 **Data availability statement:** The datasets used and/or analysed during the current study are available from the  
6 468 corresponding author on reasonable request.

7  
8 469 **Competing Interests:** None declared.  
9

10 470

## 11 471 **References**

- 12 472 1. World Health Organisation (WHO). Clinical management of severe acute respiratory infection when  
13 473 COVID-19 is suspected. 2020. [https://www.who.int/publications-detail/clinical-management-of-severe-acute-](https://www.who.int/publications-detail/clinical-management-of-severe-acute-respiratory-infection-when-novel-coronavirus-(ncov)-infection-is-suspected)  
14 474 [respiratory-infection-when-novel-coronavirus-\(ncov\)-infection-is-suspected](https://www.who.int/publications-detail/clinical-management-of-severe-acute-respiratory-infection-when-novel-coronavirus-(ncov)-infection-is-suspected) (accessed July 02, 2020).
- 15 475 2. Lauer SA, Grantz KH, Bi Q, et al. The Incubation Period of Coronavirus Disease 2019 (COVID-19)  
16 476 From Publicly Reported Confirmed Cases: Estimation and Application. *Ann Intern Med* 2020; 172(9): 577-82.
- 17 477 3. Cheng HY, Jian SW, Liu DP, Ng TC, Huang WT, Lin HH. Contact Tracing Assessment of COVID-19  
18 478 Transmission Dynamics in Taiwan and Risk at Different Exposure Periods Before and After Symptom Onset.  
19 479 *JAMA Intern Med* 2020.
- 20 480 4. Kimball A, Hatfield KM, Arons M, et al. Asymptomatic and Presymptomatic SARS-CoV-2 Infections  
21 481 in Residents of a Long-Term Care Skilled Nursing Facility - King County, Washington, March 2020. *MMWR*  
22 482 *Morb Mortal Wkly Rep* 2020; 69(13): 377-81.
- 23 483 5. Bullard J, Dust K, Funk D, et al. Predicting infectious SARS-CoV-2 from diagnostic samples. *Clin*  
24 484 *Infect Dis* 2020.
- 25 485 6. Wölfel R, Corman VM, Guggemos W, et al. Virological assessment of hospitalized patients with  
26 486 COVID-2019. *Nature* 2020; 581(7809): 465-9.
- 27 487 7. Cevik M, Tate M, Lloyd O, Maraolo AE, Schafers J, Ho A. SARS-CoV-2, SARS-CoV-1 and MERS-  
28 488 CoV viral load dynamics, duration of viral shedding and infectiousness: a living systematic review and meta-  
29 489 analysis. *medRxiv* 2020: 2020.07.25.20162107.
- 30 490 8. Endo A, Abbott S, Kucharski AJ, Funk S. Estimating the overdispersion in COVID-19 transmission  
31 491 using outbreak sizes outside China. *Wellcome Open Res* 2020; 5: 67.
- 32 492 9. Sayampanathan AA, Heng CS, Pin PH, Pang J, Leong TY, Lee VJ. Infectivity of asymptomatic versus  
33 493 symptomatic COVID-19. *Lancet* 2021; 397(10269): 93-4.
- 34 494 10. Byambasuren O, Cardona M, Bell K, Clark J, McLaws M-L, Glasziou P. Estimating the extent of  
35 495 asymptomatic COVID-19 and its potential for community transmission: Systematic review and meta-analysis.  
36 496 *Official Journal of the Association of Medical Microbiology and Infectious Disease Canada* 2020; 5(4): 223-34.
- 37 497 11. Bi Q, Wu Y, Mei S, et al. Epidemiology and transmission of COVID-19 in 391 cases and 1286 of their  
38 498 close contacts in Shenzhen, China: a retrospective cohort study. *Lancet Infect Dis* 2020.
- 39 499 12. Li R, Pei S, Chen B, et al. Substantial undocumented infection facilitates the rapid dissemination of  
40 500 novel coronavirus (SARS-CoV-2). *Science* 2020; 368(6490): 489-93.
- 41 501 13. European Centre for Disease Control and Prevention (ECDC). Rapid Risk Assessment: Coronavirus  
42 502 disease 2019 (COVID-19) in the EU/EEA and the UK– ninth update. 2020.  
43 503 [https://www.ecdc.europa.eu/en/publications-data/rapid-risk-assessment-coronavirus-disease-2019-covid-19-](https://www.ecdc.europa.eu/en/publications-data/rapid-risk-assessment-coronavirus-disease-2019-covid-19-pandemic-ninth-update)  
44 504 [pandemic-ninth-update](https://www.ecdc.europa.eu/en/publications-data/rapid-risk-assessment-coronavirus-disease-2019-covid-19-pandemic-ninth-update) (accessed July 02, 2020).
- 45 505 14. Koo JR, Cook AR, Park M, et al. Interventions to mitigate early spread of SARS-CoV-2 in Singapore:  
46 506 a modelling study. *Lancet Infect Dis* 2020.
- 47 507 15. Frieden TR, Lee CT. Identifying and Interrupting Superspreading Events-Implications for Control of  
48 508 Severe Acute Respiratory Syndrome Coronavirus 2. *Emerg Infect Dis* 2020; 26(6): 1059-66.
- 49 509 16. Kreidl P, Schmid D, Maritschnik S, et al. Emergence of coronavirus disease 2019 (COVID-19) in  
50 510 Austria. *Wien Klin Wochenschr* 2020: 1-8.
- 51 511 17. Popa A, Genger JW, Nicholson MD, et al. Genomic epidemiology of superspreading events in Austria  
52 512 reveals mutational dynamics and transmission properties of SARS-CoV-2. *Sci Transl Med* 2020; 12(573).

- 1  
2  
3 513 18. Independent T. <https://www.independent.co.uk/news/world/europe/coronavirus-austria-cases-covid-19-hospital-lockdown-latest-a9466281.html>. 2020.(Accessed September 05, 2020)  
4 514
- 5 515 19. (European Centre for Disease Control and Prevention (ECDC). Coronavirus disease 2019 (COVID-19)  
6 516 in the EU/EEA and the UK –ninth update, 2020.  
7 517 [https://www.ecdc.europa.eu/sites/default/files/documents/covid-19-rapid-risk-assessment-coronavirus-disease-](https://www.ecdc.europa.eu/sites/default/files/documents/covid-19-rapid-risk-assessment-coronavirus-disease-2019-ninth-update-23-april-2020.pdf)  
8 518 [2019-ninth-update-23-april-2020.pdf](https://www.ecdc.europa.eu/sites/default/files/documents/covid-19-rapid-risk-assessment-coronavirus-disease-2019-ninth-update-23-april-2020.pdf) (Accessed July 02, 2020)
- 9 519 20. de Sutter A, Llor C, Maier M, et al. Family medicine in times of 'COVID-19': A generalists' voice. *Eur J Gen Pract* 2020; 26(1): 58-60.  
10 520
- 11 521 21. Hull SA, Williams C, Ashworth M, Carvalho C, Boomla K. Prevalence of suspected COVID-19  
12 522 infection in patients from ethnic minority populations: a cross-sectional study in primary care. *British Journal of*  
13 523 *General Practice* 2020; 70(699): e696-e704.
- 14 524 22. European Centres for Disease Control (ECDC). Strategies for the surveillance of COVID-19, 2020.  
15 525 <https://www.ecdc.europa.eu/sites/default/files/documents/COVID-19-surveillance-strategy-9-Apr-2020.pdf>  
16 526 (accessed July 11, 2020).
- 17 527 23. de Lusignan S, Dorward J, Correa A, et al. Risk factors for SARS-CoV-2 among patients in the Oxford  
18 528 Royal College of General Practitioners Research and Surveillance Centre primary care network: a cross-  
19 529 sectional study. *Lancet Infect Dis* 2020.
- 20 530 24. Zentrum für Virologie Medizinische Universität Wien. Projekt Diagnostisches Influenzanezwerk  
21 531 Österreich (DINÖ). [https://www.virologie.meduniwien.ac.at/wissenschaft-forschung/virus-](https://www.virologie.meduniwien.ac.at/wissenschaft-forschung/virus-epidemiologie/influenza-projekt-diagnostisches-influenzanezwerk-oesterreich-dinoe/)  
22 532 [epidemiologie/influenza-projekt-diagnostisches-influenzanezwerk-oesterreich-dinoe/](https://www.virologie.meduniwien.ac.at/wissenschaft-forschung/virus-epidemiologie/influenza-projekt-diagnostisches-influenzanezwerk-oesterreich-dinoe/) (Accessed July 02, 2020).
- 23 533 25. Federal Ministry of Social Affairs H, Care and Consumer Protection, Republic of Austria. National  
24 534 Health Hotline 1450. 2019. <https://www.1450.at/1450-die-gesundheitsnummer/> (accessed May 28, 2020).
- 25 535 26. Corman V, Bleicker T, Brünink S, et al. Diagnostic detection of 2019-nCoV by real-time RT-PCR.  
26 536 [https://www.who.int/docs/default-source/coronaviruse/protocol-v2-1.pdf?sfvrsn=a9ef618c\\_2](https://www.who.int/docs/default-source/coronaviruse/protocol-v2-1.pdf?sfvrsn=a9ef618c_2) (accessed  
27 537 September 29, 2020).
- 28 538 27. Kretzschmar ME, Rozhnova G, Bootsma MCJ, van Boven M, van de Wijgert JHHM, Bonten MJM.  
29 539 Impact of delays on effectiveness of contact tracing strategies for COVID-19: a modelling study. *The Lancet*  
30 540 *Public Health*.
- 31 541 28. Stadlbauer D, Amanat F, Chromikova V, et al. SARS-CoV-2 Seroconversion in Humans: A Detailed  
32 542 Protocol for a Serological Assay, Antigen Production, and Test Setup. *Curr Protoc Microbiol* 2020; 57(1): e100.
- 33 543 29. Ahn JY, Sohn Y, Lee SH, et al. Use of Convalescent Plasma Therapy in Two COVID-19 Patients with  
34 544 Acute Respiratory Distress Syndrome in Korea. *J Korean Med Sci* 2020; 35(14): e149.
- 35 545 30. Pinnock H, Epiphaniou E, Sheikh A, et al. Developing standards for reporting implementation studies  
36 546 of complex interventions (StaRI): a systematic review and e-Delphi. *Implementation Science* 2015; 10(1): 42.
- 37 547 31. Shu Y, McCauley J. GISAID: Global initiative on sharing all influenza data - from vision to reality.  
38 548 *Eurosurveillance: bulletin European sur les maladies transmissibles = European communicable disease bulletin*  
39 549 *2017; 22(13)*.
- 40 550 32. Mercatelli D, Giorgi FM. Geographic and Genomic Distribution of SARS-CoV-2 Mutations. *Frontiers*  
41 551 *in Microbiology* 2020; 11(1800).
- 42 552 33. Global Initiative on Sharing All Influenza Data (GISAID). Clade and lineage nomenclature aids in  
43 553 genomic epidemiology studies of active hCoV-19 viruses. 2020. [https://www.gisaid.org/references/statements-](https://www.gisaid.org/references/statements-clarifications/clade-and-lineage-nomenclature-aids-in-genomic-epidemiology-of-active-hcov-19-viruses/)  
44 554 [clarifications/clade-and-lineage-nomenclature-aids-in-genomic-epidemiology-of-active-hcov-19-viruses/](https://www.gisaid.org/references/statements-clarifications/clade-and-lineage-nomenclature-aids-in-genomic-epidemiology-of-active-hcov-19-viruses/)  
45 555 (accessed September 05, 2020).
- 46 556 34. Panovska-Griffiths J, Kerr CC, Stuart RM, et al. Determining the optimal strategy for reopening  
47 557 schools, the impact of test and trace interventions, and the risk of occurrence of a second COVID-19 epidemic  
48 558 wave in the UK: a modelling study. *The Lancet Child & Adolescent Health*.
- 49 559 35. Aziz M, Goyal H, Haghbin H, Lee-Smith WM, Gajendran M, Perisetti A. The Association of "Loss of  
50 560 Smell" to COVID-19: A Systematic Review and Meta-Nnalysis. *Am J Med Sci* 2020.
- 51 561 36. von Bartheld CS, Hagen MM, Butowt R. Prevalence of Chemosensory Dysfunction in COVID-19  
52 562 Patients: A Systematic Review and Meta-analysis Reveals Significant Ethnic Differences. *ACS Chem Neurosci*  
53 563 *2020; 11(19): 2944-61*.

- 1  
2  
3 564 37. Lechien JR, Chiesa-Estomba CM, Hans S, Barillari MR, Jouffe L, Saussez S. Loss of Smell and Taste  
4 565 in 2013 European Patients With Mild to Moderate COVID-19. *Ann Intern Med* 2020.
- 5 566 38. Menni C, Valdes AM, Freidin MB, et al. Real-time tracking of self-reported symptoms to predict  
6 567 potential COVID-19. *Nat Med* 2020.
- 8 568 39. Maltezou HC, Vorou R, Papadima K, et al. Transmission dynamics of SARS-CoV-2 within families  
9 569 with children in Greece: A study of 23 clusters. *J Med Virol* 2020.
- 10 570 40. Lovato A, de Filippis C. Clinical Presentation of COVID-19: A Systematic Review Focusing on Upper  
11 571 Airway Symptoms. *Ear Nose Throat J* 2020: 145561320920762.
- 13 572 41. Sung Y-T, Wu J-S. The Visual Analogue Scale for Rating, Ranking and Paired-Comparison (VAS-  
14 573 RRP): A new technique for psychological measurement. *Behav Res Methods* 2018; 50(4): 1694-715.
- 15 574 42. Rojas-Lechuga MJ, Izquierdo-Domínguez A, Chiesa-Estomba C, et al. Chemosensory dysfunction in  
16 575 COVID-19 out-patients. *Eur Arch Otorhinolaryngol* 2020: 1-8.
- 17 576 43. NHS England England. NHS Test and Trace – week 4 of contact tracing, England: 18 to 24 June 2020.  
18 577 2020. <https://www.gov.uk/government/publications/nhs-test-and-trace-statistics-england-18-june-to-24-june-2020/weekly-nhs-test-and-trace-bulletin-england-18-24-june-2020> (accessed September 09, 2020).  
19 578  
20 579

## 22 580 **FIGURE LEGENDS**

24 581 Figure 1: Flow-chart. Twenty-two patients had COVID-19 infection confirmed by antibody testing, including 15  
25 582 patients diagnosed with acute disease (reactive RT-qPCR) and 7 with convalescent disease (non-reactive RT-  
26 583 qPCR); among the former, 9 patients tested concordant antibody positive and 6 patients tested neutralizing  
27 584 antibody positive following discordant ELISA result; and among the latter, 5 patients tested concordant  
28 585 antibody positive and 2 patients tested neutralizing antibody positive following discordant ELISA result. 44  
29 586 patients with non-reactive RT-qPCR tested antibody negative, including 41 with concordant negative ELISA, 1  
30 587 patient with negative neutralizing antibody after discordant ELISA result and 2 patients diagnosed with  
31 588 Influenza. Antibody status was not available for 7 patients. \*\*Final clinical diagnoses included infectious  
32 589 mononucleosis (N=2); bacterial tonsillitis, bacterial pneumonia, and bronchitis and exacerbation of COPD  
33 590 (N=1, each). \*\*\*No concordant negatives.

39 591  
40 592 Figure 2: (A) Cumulative COVID-19 diagnosis in the ski-resort Schladming-Dachstein over time. The main  
41 593 outbreak occurred after a three-day party event (March 13 to 15) celebrating the early termination of the skiing  
42 594 season due to National lockdown commencing on March 16. Between March 11 (index case) and April 03 (last  
43 595 endemic case), 8 people were diagnosed with acute infection (RT-qPCR-reactive, confirmed antibody positive)  
44 596 in the first half (12 days from March 11 to 22, 2020) of the outbreak (green colour), and 7 people with late acute  
45 597 infection (amber) and 7 people with convalescent infection (red) were detected during the second half; (B)  
46 598 Cumulative weekly numbers of confirmed COVID-19 cases during the outbreak. RT-qPCR was 100% sensitive  
47 599 among all early acute and late acute presenters. RT-qPCR did not detect any of the late convalescent presenters;  
48 600 (C) Mean duration of symptoms; and (D): Mean number of symptoms.

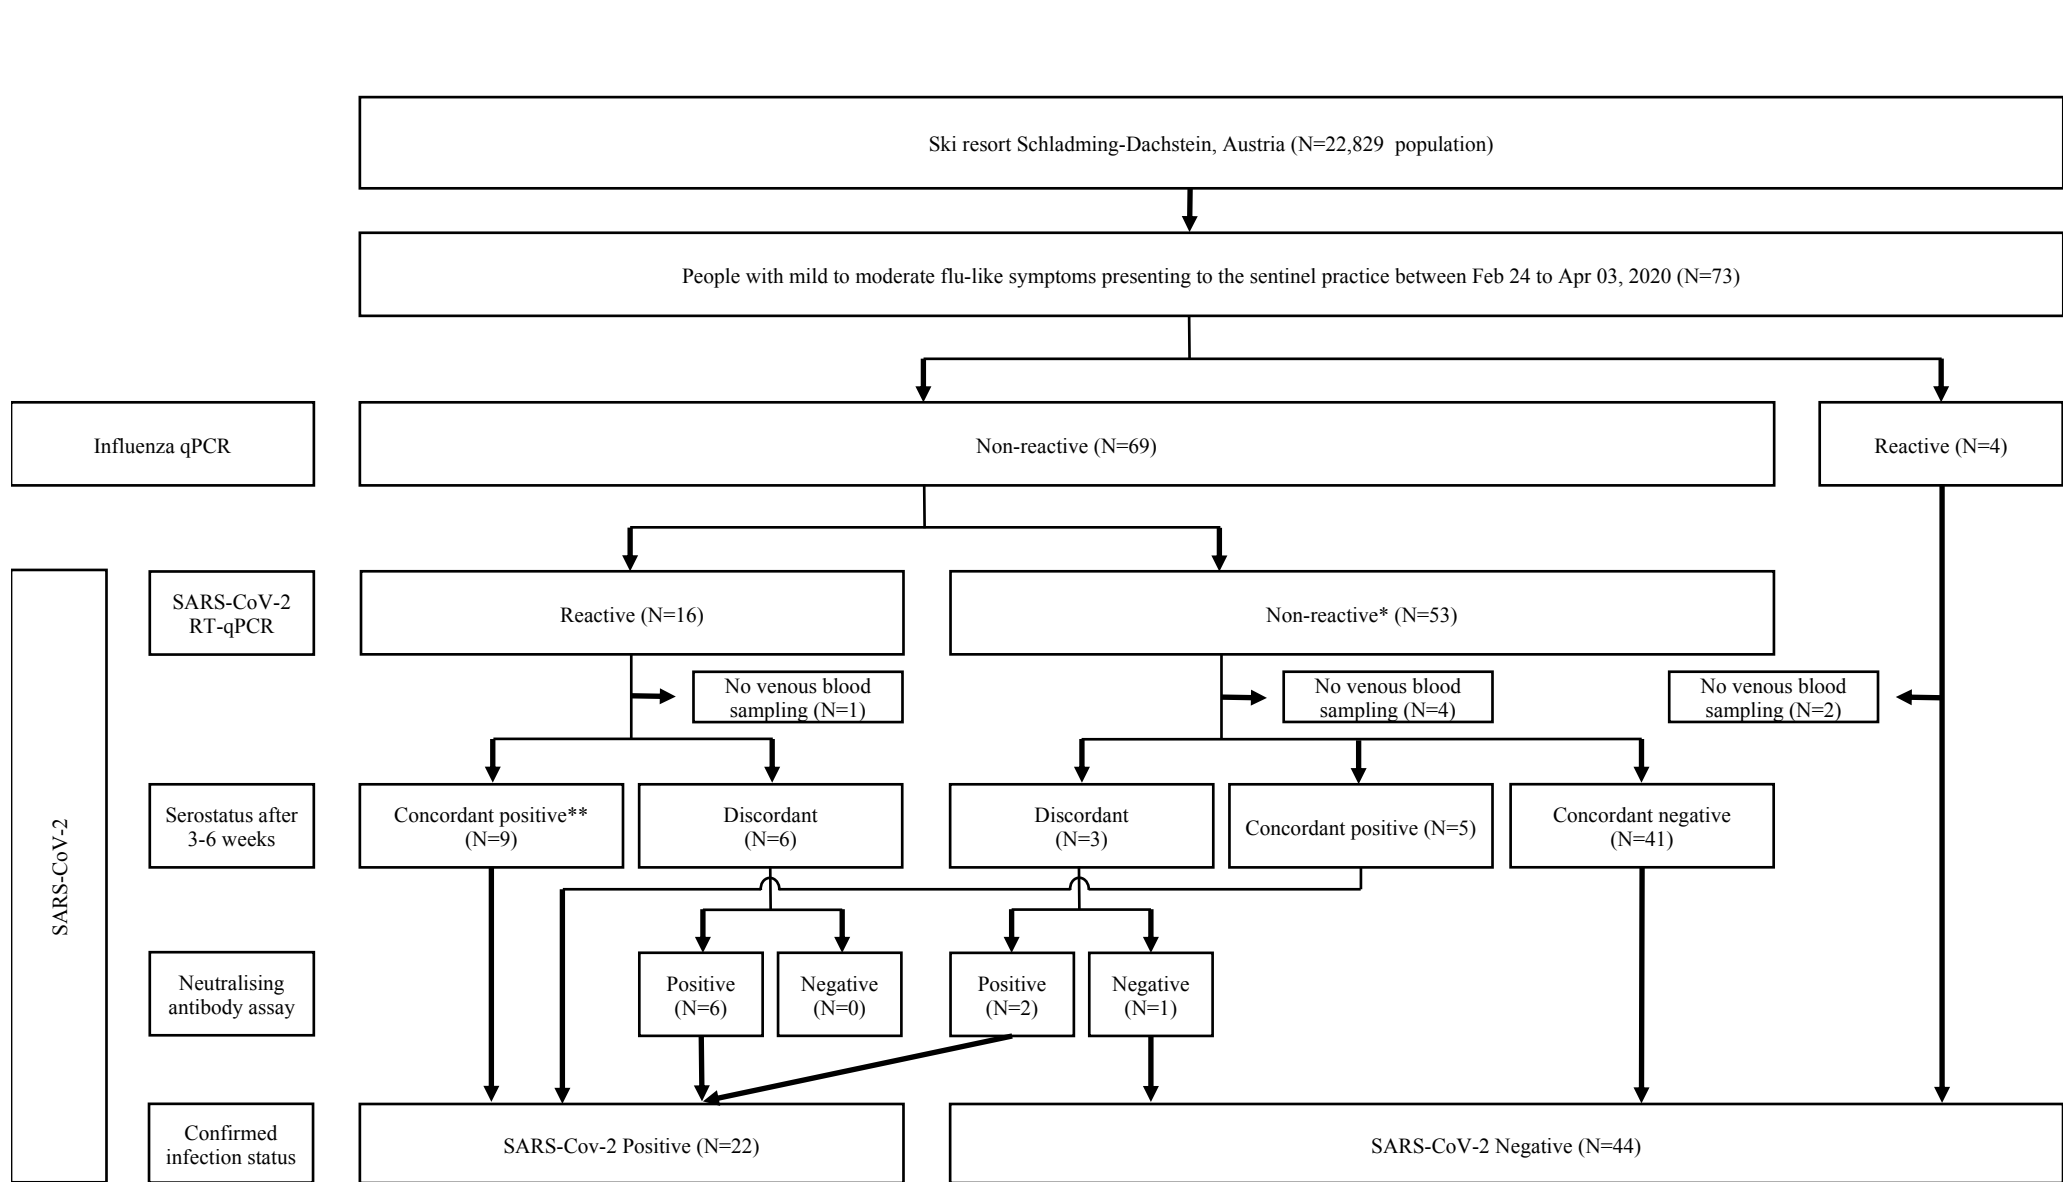



1  
2  
3  
4  
5  
6  
7  
8  
9  
10  
11  
12  
13  
14  
15  
16  
17  
18  
19  
20  
21  
22  
23  
24  
25  
26  
27  
28  
29  
30  
31  
32  
33  
34  
35  
36  
37  
38  
39  
40  
41



**STROBE 2007 (v4) Statement—Checklist of items that should be included in reports of *cohort studies***

| Section/Topic                | Item # | Recommendation                                                                                                                                                                       | Reported on page # |
|------------------------------|--------|--------------------------------------------------------------------------------------------------------------------------------------------------------------------------------------|--------------------|
| <b>Title and abstract</b>    | 1      | (a) Indicate the study's design with a commonly used term in the title or the abstract                                                                                               | 2                  |
|                              |        | (b) Provide in the abstract an informative and balanced summary of what was done and what was found                                                                                  | 2,3                |
| <b>Introduction</b>          |        |                                                                                                                                                                                      |                    |
| Background/rationale         | 2      | Explain the scientific background and rationale for the investigation being reported                                                                                                 | 3,4                |
| Objectives                   | 3      | State specific objectives, including any prespecified hypotheses                                                                                                                     | 4                  |
| <b>Methods</b>               |        |                                                                                                                                                                                      |                    |
| Study design                 | 4      | Present key elements of study design early in the paper                                                                                                                              | 5                  |
| Setting                      | 5      | Describe the setting, locations, and relevant dates, including periods of recruitment, exposure, follow-up, and data collection                                                      | 5                  |
| Participants                 | 6      | (a) Give the eligibility criteria, and the sources and methods of selection of participants. Describe methods of follow-up                                                           | 5                  |
|                              |        | (b) For matched studies, give matching criteria and number of exposed and unexposed                                                                                                  | NA                 |
| Variables                    | 7      | Clearly define all outcomes, exposures, predictors, potential confounders, and effect modifiers. Give diagnostic criteria, if applicable                                             | 7,8                |
| Data sources/<br>measurement | 8*     | For each variable of interest, give sources of data and details of methods of assessment (measurement). Describe comparability of assessment methods if there is more than one group | 6,7                |
| Bias                         | 9      | Describe any efforts to address potential sources of bias                                                                                                                            | 6,13               |
| Study size                   | 10     | Explain how the study size was arrived at                                                                                                                                            | 5                  |
| Quantitative variables       | 11     | Explain how quantitative variables were handled in the analyses. If applicable, describe which groupings were chosen and why                                                         | 7,8                |
| Statistical methods          | 12     | (a) Describe all statistical methods, including those used to control for confounding                                                                                                | 7,8                |
|                              |        | (b) Describe any methods used to examine subgroups and interactions                                                                                                                  | 7,8                |
|                              |        | (c) Explain how missing data were addressed                                                                                                                                          | 8                  |
|                              |        | (d) If applicable, explain how loss to follow-up was addressed                                                                                                                       | 8                  |
|                              |        | (e) Describe any sensitivity analyses                                                                                                                                                | NA                 |
| <b>Results</b>               |        |                                                                                                                                                                                      |                    |

|                          |     |                                                                                                                                                                                                              |                   |
|--------------------------|-----|--------------------------------------------------------------------------------------------------------------------------------------------------------------------------------------------------------------|-------------------|
| Participants             | 13* | (a) Report numbers of individuals at each stage of study—eg numbers potentially eligible, examined for eligibility, confirmed eligible, included in the study, completing follow-up, and analysed            | 8                 |
|                          |     | (b) Give reasons for non-participation at each stage                                                                                                                                                         | 8                 |
|                          |     | (c) Consider use of a flow diagram                                                                                                                                                                           | Figure 1 attached |
| Descriptive data         | 14* | (a) Give characteristics of study participants (eg demographic, clinical, social) and information on exposures and potential confounders                                                                     | 8                 |
|                          |     | (b) Indicate number of participants with missing data for each variable of interest                                                                                                                          | 8                 |
|                          |     | (c) Summarise follow-up time (eg, average and total amount)                                                                                                                                                  | 8                 |
| Outcome data             | 15* | Report numbers of outcome events or summary measures over time                                                                                                                                               | 8                 |
| Main results             | 16  | (a) Give unadjusted estimates and, if applicable, confounder-adjusted estimates and their precision (eg, 95% confidence interval). Make clear which confounders were adjusted for and why they were included | 9,10              |
|                          |     | (b) Report category boundaries when continuous variables were categorized                                                                                                                                    | NA                |
|                          |     | (c) If relevant, consider translating estimates of relative risk into absolute risk for a meaningful time period                                                                                             | NA                |
| Other analyses           | 17  | Report other analyses done—eg analyses of subgroups and interactions, and sensitivity analyses                                                                                                               | 9,10              |
| <b>Discussion</b>        |     |                                                                                                                                                                                                              |                   |
| Key results              | 18  | Summarise key results with reference to study objectives                                                                                                                                                     | 11,12             |
| <b>Limitations</b>       |     |                                                                                                                                                                                                              | 13                |
| Interpretation           | 20  | Give a cautious overall interpretation of results considering objectives, limitations, multiplicity of analyses, results from similar studies, and other relevant evidence                                   | 12,13             |
| Generalisability         | 21  | Discuss the generalisability (external validity) of the study results                                                                                                                                        | 13                |
| <b>Other information</b> |     |                                                                                                                                                                                                              |                   |
| Funding                  | 22  | Give the source of funding and the role of the funders for the present study and, if applicable, for the original study on which the present article is based                                                | 14                |

\*Give information separately for cases and controls in case-control studies and, if applicable, for exposed and unexposed groups in cohort and cross-sectional studies.

**Note:** An Explanation and Elaboration article discusses each checklist item and gives methodological background and published examples of transparent reporting. The STROBE checklist is best used in conjunction with this article (freely available on the Web sites of PLoS Medicine at <http://www.plosmedicine.org/>, Annals of Internal Medicine at <http://www.annals.org/>, and Epidemiology at <http://www.epidem.com/>). Information on the STROBE Initiative is available at [www.strobe-statement.org](http://www.strobe-statement.org).

# BMJ Open

## Rapid, early and accurate SARS-CoV-2 detection using RT-PCR in primary care: A prospective cohort study (REAP-1)

|                                 |                                                                                                                                                                                                                                                                                                                                                                                                                                                                                                                                                                                                                                                                                                                                                                                                                                                                                                                                                                                                                                                                                                                                                                                                                                                                                                                                                                                                                                                                                                                                                                                                                                                                                                                                                                                                                                                                                                                                                                                                                                                                                                                                                                  |
|---------------------------------|------------------------------------------------------------------------------------------------------------------------------------------------------------------------------------------------------------------------------------------------------------------------------------------------------------------------------------------------------------------------------------------------------------------------------------------------------------------------------------------------------------------------------------------------------------------------------------------------------------------------------------------------------------------------------------------------------------------------------------------------------------------------------------------------------------------------------------------------------------------------------------------------------------------------------------------------------------------------------------------------------------------------------------------------------------------------------------------------------------------------------------------------------------------------------------------------------------------------------------------------------------------------------------------------------------------------------------------------------------------------------------------------------------------------------------------------------------------------------------------------------------------------------------------------------------------------------------------------------------------------------------------------------------------------------------------------------------------------------------------------------------------------------------------------------------------------------------------------------------------------------------------------------------------------------------------------------------------------------------------------------------------------------------------------------------------------------------------------------------------------------------------------------------------|
| Journal:                        | <i>BMJ Open</i>                                                                                                                                                                                                                                                                                                                                                                                                                                                                                                                                                                                                                                                                                                                                                                                                                                                                                                                                                                                                                                                                                                                                                                                                                                                                                                                                                                                                                                                                                                                                                                                                                                                                                                                                                                                                                                                                                                                                                                                                                                                                                                                                                  |
| Manuscript ID                   | bmjopen-2020-045225.R3                                                                                                                                                                                                                                                                                                                                                                                                                                                                                                                                                                                                                                                                                                                                                                                                                                                                                                                                                                                                                                                                                                                                                                                                                                                                                                                                                                                                                                                                                                                                                                                                                                                                                                                                                                                                                                                                                                                                                                                                                                                                                                                                           |
| Article Type:                   | Original research                                                                                                                                                                                                                                                                                                                                                                                                                                                                                                                                                                                                                                                                                                                                                                                                                                                                                                                                                                                                                                                                                                                                                                                                                                                                                                                                                                                                                                                                                                                                                                                                                                                                                                                                                                                                                                                                                                                                                                                                                                                                                                                                                |
| Date Submitted by the Author:   | 12-May-2021                                                                                                                                                                                                                                                                                                                                                                                                                                                                                                                                                                                                                                                                                                                                                                                                                                                                                                                                                                                                                                                                                                                                                                                                                                                                                                                                                                                                                                                                                                                                                                                                                                                                                                                                                                                                                                                                                                                                                                                                                                                                                                                                                      |
| Complete List of Authors:       | <p>Leber, Werner; Queen Mary University of London, Institute of Population Health Sciences, Centre for Clinical Effectiveness and Health Data Science</p> <p>Lammel, Oliver; Praxis Dr Lammel</p> <p>Redlberger-Fritz, Monika; Medical University of Vienna, Center for Virology</p> <p>Mustafa-Korninger, Maria Elisabeth; 4 Medizinisch-chemisches Labor Dr. Mustafa, Dr. Richter OG</p> <p>Glehr, Reingard Christina; Medical University of Graz, Institute of General Practice and Evidence-based Health Services Research</p> <p>Camp, Jeremy; Medical University of Vienna, Center for Virology</p> <p>Agerer, Benedikt; Research Center for Molecular Medicine of the Austrian Academy of Sciences</p> <p>Lercher, Alexander; Research Center for Molecular Medicine of the Austrian Academy of Sciences</p> <p>Popa, Alexandra; Research Center for Molecular Medicine of the Austrian Academy of Sciences</p> <p>Genger, Jakob-Wendelin; Research Center for Molecular Medicine of the Austrian Academy of Sciences</p> <p>Penz, Thomas; Research Center for Molecular Medicine of the Austrian Academy of Sciences</p> <p>Aberle, Stephan; Medical University of Vienna, Center for Virology</p> <p>Bock, Christoph; Research Center for Molecular Medicine of the Austrian Academy of Sciences</p> <p>Bergthaler, Andreas; Research Center for Molecular Medicine of the Austrian Academy of Sciences</p> <p>Stiasny, Karin; Medical University of Vienna, Center for Virology</p> <p>Hochstrasser, Eva-Maria; Praxis Dr Lammel</p> <p>Hoellinger, Christian; Paracelsus Medical Private University</p> <p>Siebenhofer, Andrea; Institute of General Practice and Evidence-based Health Services Research, Medical University Graz; Institute for General Practice, Goethe University Frankfurt</p> <p>Griffiths, Chris; Queen Mary University of London, Institute of Population Health Sciences</p> <p>Panovska-Griffiths, Jasmina; NIHR CLAHRC North Thames, Department of Applied Health Research, University College London, London, United Kingdom; University of Oxford, Wolfson Centre for Mathematical Biology &amp; The Queen's College</p> |
| <b>Primary Subject Heading</b>: | General practice / Family practice                                                                                                                                                                                                                                                                                                                                                                                                                                                                                                                                                                                                                                                                                                                                                                                                                                                                                                                                                                                                                                                                                                                                                                                                                                                                                                                                                                                                                                                                                                                                                                                                                                                                                                                                                                                                                                                                                                                                                                                                                                                                                                                               |

1  
2  
3  
4  
5  
6  
7  
8  
9  
10  
11  
12  
13  
14  
15  
16  
17  
18  
19  
20  
21  
22  
23  
24  
25  
26  
27  
28  
29  
30  
31  
32  
33  
34  
35  
36  
37  
38  
39  
40  
41  
42  
43  
44  
45  
46  
47  
48  
49  
50  
51  
52  
53  
54  
55  
56  
57  
58  
59  
60

|                            |                                                                       |
|----------------------------|-----------------------------------------------------------------------|
| Secondary Subject Heading: | Infectious diseases, Public health                                    |
| Keywords:                  | PRIMARY CARE, COVID-19, Public health < INFECTIOUS DISEASES, VIROLOGY |
|                            |                                                                       |

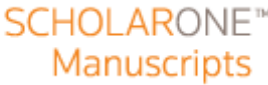



I, the Submitting Author has the right to grant and does grant on behalf of all authors of the Work (as defined in the below author licence), an exclusive licence and/or a non-exclusive licence for contributions from authors who are: i) UK Crown employees; ii) where BMJ has agreed a CC-BY licence shall apply, and/or iii) in accordance with the terms applicable for US Federal Government officers or employees acting as part of their official duties; on a worldwide, perpetual, irrevocable, royalty-free basis to BMJ Publishing Group Ltd ("BMJ") its licensees and where the relevant Journal is co-owned by BMJ to the co-owners of the Journal, to publish the Work in this journal and any other BMJ products and to exploit all rights, as set out in our [licence](#).

The Submitting Author accepts and understands that any supply made under these terms is made by BMJ to the Submitting Author unless you are acting as an employee on behalf of your employer or a postgraduate student of an affiliated institution which is paying any applicable article publishing charge ("APC") for Open Access articles. Where the Submitting Author wishes to make the Work available on an Open Access basis (and intends to pay the relevant APC), the terms of reuse of such Open Access shall be governed by a Creative Commons licence – details of these licences and which [Creative Commons](#) licence will apply to this Work are set out in our licence referred to above.

Other than as permitted in any relevant BMJ Author's Self Archiving Policies, I confirm this Work has not been accepted for publication elsewhere, is not being considered for publication elsewhere and does not duplicate material already published. I confirm all authors consent to publication of this Work and authorise the granting of this licence.

1  
2  
3  
4 1 Title: Rapid, early and accurate SARS-CoV-2 detection using RT-PCR in primary care: A  
5 2 prospective cohort study (REAP-1)  
6  
7  
8 3

9 4 Date: May 09, 2021  
10  
11 5

12 6 Version: 3.0  
13  
14 7

15 8 Co-authors  
16  
17 9

18 10 Werner Leber<sup>1,\*,&</sup>  
19  
20 11

21 12 Oliver Lammel<sup>2</sup>  
22  
23 13

24 14 Monika Redlberger-Fritz<sup>3</sup>  
25  
26 15

27 16 Maria Elisabeth Mustafa-Korninger<sup>4</sup>  
28  
29 17

30 18 Reingard Christina Glehr<sup>5</sup>  
31  
32 19

33 20 Jeremy V. Camp<sup>3</sup>  
34  
35 21

36 22 Benedikt Agerer<sup>6</sup>  
37  
38 23

39 24 Alexander Lercher<sup>6</sup>  
40  
41 25

42 26 Alexandra M. Popa<sup>6</sup>  
43  
44 27

45 28 Jakob-Wendelin Genger<sup>6</sup>  
46  
47 29

48 30 Thomas Penz<sup>6</sup>  
49  
50 31

51 32 Stephan Aberle<sup>3</sup>  
52  
53 33

54 34 Christoph Bock<sup>6</sup>  
55  
56 35

57 36 Andreas Bergthaler<sup>6</sup>  
58  
59 37

60 38 Karin Stiasny<sup>3</sup>  
61  
62 39

63 40 Eva-Maria Hochstrasser<sup>2</sup>  
64  
65 41

66 42 Christian Hoellinger<sup>7</sup>  
67  
68 43

69 44 Andrea Siebenhofer<sup>5,8</sup>  
70  
71 45

72 46 Chris Griffiths<sup>1</sup>  
73  
74 47

75 48 Jasmina Panovska-Griffiths<sup>9,10,11,\*,&</sup>  
76  
77 49

78 50  
79 51  
80 52

1  
2  
3 31 <sup>1</sup> Centre for Clinical Effectiveness and Health Data Science, Institute of Population Health Sciences, Barts School  
4 32 of Medicine and Dentistry, Queen Mary University of London, London, UK

5  
6 33 <sup>2</sup> Practice Dr. Lammel, Ramsau am Dachstein, Austria

7  
8 34 <sup>3</sup> Center for Virology, Medical University of Vienna, Vienna, Austria

9  
10 35 <sup>4</sup> Medizinisch-chemisches Labor Dr. Mustafa, Dr. Richter OG, Salzburg, Austria

11  
12 36 <sup>5</sup> Institute of General Practice and Evidence-based Health Services Research, Medical University of Graz, Graz,  
13 37 Austria

14  
15 38 <sup>6</sup> CeMM Research Center for Molecular Medicine of the Austrian Academy of Sciences, Vienna, Austria

16  
17 39 <sup>7</sup> Paracelsus Medical University, Salzburg, Austria

18  
19 40 <sup>8</sup> Institute of General Practice, Goethe-University Frankfurt am Main, Frankfurt am Main, Germany

20  
21 41 <sup>9</sup> Department of Applied Health Care, Institute of Epidemiology & Health Care, University College London,  
22 42 London

23  
24 43 <sup>10</sup> Institute for Global Health, University College London, London, UK

25  
26 44 <sup>11</sup> The Queen's College, University of Oxford, Oxford, UK

27  
28 45

29  
30 46 & these authors contributed equally

31  
32 47 \* Corresponding authors: [w.leber@qmul.ac.uk](mailto:w.leber@qmul.ac.uk), [j.panovska-griffiths@ucl.ac.uk](mailto:j.panovska-griffiths@ucl.ac.uk)

33  
34 48

35  
36 49 **ABSTRACT**

37  
38 50 **Objectives:** We explore the importance of SARS-CoV-2 sentinel surveillance testing in primary care during a  
39 51 regional COVID-19 outbreak in Austria.

40  
41 52 **Design:** Prospective cohort study.

42  
43 53 **Setting:** A single sentinel practice serving 22,829 people in the ski-resort of Schladming-Dachstein.

44  
45 54 **Participants:** All 73 patients presenting with mild-to-moderate flu-like symptoms between 24 February and 03  
46 55 April, 2020.

47  
48 56 **Intervention:** Nasopharyngeal sampling to detect SARS-CoV-2 using real-time reverse transcriptase-polymerase  
49 57 chain reaction (RT-qPCR).

50  
51 58 **Outcome measures:** We compared RT-qPCR at presentation with confirmed antibody status. We split the  
52 59 outbreak in two parts, by halving the period from the first to the last case, to characterise three cohorts of patients  
53 60 with confirmed infection: early acute (RT-qPCR reactive) in the first half; and late acute (reactive) and late  
54 61 convalescent (non-reactive) in the second half. For each cohort we report the number of cases detected, the  
55 62 accuracy of RT-qPCR, the duration and variety of symptoms, and the number of viral clades present.

1  
2  
3 **63 Results:** Twenty-two patients were diagnosed with COVID-19 (8 early acute, 7 late acute and 7 late convalescent),  
4 **64** 44 patients tested SARS-CoV-2 negative, and 7 were excluded. The sensitivity of RT-qPCR was 100% among all  
5 **65** acute cases, dropping to 68.1% when including convalescent. Test specificity was 100%. Mean duration of  
6 **66** symptoms for each group were 2 days (range 1-4) among early acute, 4.4 days (1-7) among late acute and 8 days  
7 **67** (2-12) among late convalescent. Confirmed infection was associated with loss of taste. Acute infection was  
8 **68** associated with loss of taste, nausea/vomiting, breathlessness, sore throat and myalgia; but not anosmia, fever or  
9 **69** cough. Transmission clusters of three viral clades (G, GR and L) were identified.

10 **70 Conclusions:** RT-qPCR testing in primary care can rapidly and accurately detect SARS-CoV-2 among people  
11 **71** with flu-like illness in a heterogenous viral outbreak. Targeted testing in primary care can support national sentinel  
12 **72** surveillance of coronavirus.  
13

14 **73**

#### 15 **74 Strengths and limitations of this study**

- 16 **75** • Our study was conducted in a state-of-the-art sentinel surveillance practice, participating in the Austrian  
17 **76** National Influenza Screening Programme, covering the entire period of a regional COVID-19 outbreak.
- 18 **77** • Symptomatic patients received same-day appointments with a clinician for nasopharyngeal swabs, and people  
19 **78** testing RT-qPCR reactive were notified within 24 hours.
- 20 **79** • Cases were confirmed using a combination of five different ELISA platforms and neutralising antibody assay.
- 21 **80** • The relatively small patient cohort from a single testing site limits conclusion on causality and generalisability.
- 22 **81** • Any difference in symptoms observed between study cohorts may be due to recall bias occurred, particularly  
23 **82** among those people presenting late.

24 **83**

## 25 **84 INTRODUCTION**

26 **85** The coronavirus 2019 disease (COVID-19) pandemic, caused by severe acute respiratory syndrome coronavirus  
27 **86** 2 (SARS-CoV-2), continues to spread globally with more than 96 million cases, and over two million deaths  
28 **87** reported as of January 22, 2021. Undetected infection and delays in implementing an effective test-trace-isolate  
29 **88** (TTI) strategy have contributed to the spread of the virus becoming a pandemic. SARS-CoV-2 virus has a wide  
30 **89** spectrum of manifestations including no symptoms (asymptomatic infection), mild to moderate to severe flu-like  
31 **90** illness, loss of taste or smell, pneumonia and acute respiratory distress syndrome (ARDS), sepsis, multi-organ  
32 **91** failure and death.<sup>1</sup> In studies to date, the reported time for the infection to become symptomatic (incubation period)  
33 **92** varies among different cohorts and settings, with a median incubation period around 5.1 days,<sup>2</sup> infectivity starting  
34 **93** 2.3 days before symptom onset, peaking 1-2 days before that, and gradually declining over 7-10 days.<sup>3-6</sup>

35 **94**

36 **95** SARS-CoV-2 has the potential for 'superspreading' events, resulting in clusters of disease outbreaks among a  
37 **96** large number of people. Most infections remain isolated cases, but a small number of individuals (10%) may  
38 **97** cause up to 80% of secondary transmissions.<sup>7</sup> Although symptomatic infection is common (17 %, range 4-41%),  
39 **98** the relative risk for symptomatic transmission may be up to six times higher than for asymptomatic infection.<sup>8-10</sup>  
40 **99** Undocumented infection may constitute the majority of cases (86%), causing more than half (55%) of all  
41 **100** documented infections.<sup>11</sup> Superspreading events have been reported from across the globe, and countries



1  
2  
3 101 achieving early viral suppression took rapid and decisive action to implement comprehensive case identification  
4 102 and testing, combined with contact tracing and isolation.<sup>12,13</sup> For epidemic control of COVID-19, the effective  
5  
6 103 reproduction number,  $R_e$ , needs to be less than 1; the presence of undetected and persistent infection within the  
7  
8 104 population, even if very small, can increase  $R_e$  and induce a secondary peak of infections. Therefore, rapid  
9  
10 105 identification and containment of infection is a key factor for the prevention of onward transmission and  
11  
12 106 controlling the virus to protect the public.<sup>14</sup>

13  
14 107

15 108 In Austria, the first two COVID-19 cases were reported among travelers from Italy in the city of Innsbruck on  
16 109 February 25, 2020.<sup>15</sup> Multiple superspreading events then occurred among tourists visiting Austrian ski-resorts,  
17 110 including the town of Ischgl, that are believed to have led to further outbreaks in the tourists' home countries,  
18 111 including Germany, Denmark and Sweden.<sup>15,16</sup> Austria was one of the first countries to adopt comprehensive  
19 112 lockdown measures on March 16, 2020, including protection of vulnerable groups, penalty fees for breaching  
20 113 self-isolation, and a national health hotline to facilitate testing at acute care settings and *via* mobile units.<sup>17</sup> The  
21 114 first death from COVID-19 associated complications occurred on March 12, 2020, and as of January 21, 403.512  
22 115 cases and 7.389 COVID-19 related deaths have been reported.

23  
24 116

25  
26 117 General practice (GP) is considered a key partner in case recording, managing high-risk groups and delivery of  
27 118 equitable care.<sup>18-20</sup> The European Centre for Disease Prevention and Control (ECDC) recommended integration  
28 119 of "COVID-19 surveillance with sentinel surveillance of influenza-like illness or acute respiratory infection."<sup>21</sup>  
29 120 However, in some countries, like the UK and the USA, primary care has been largely excluded from the national  
30 121 TTI strategy.<sup>22,23</sup> In contrast, Austria additionally offered SARS-CoV-2 real-time reverse transcriptase-  
31 122 polymerase chain reaction (RT-qPCR) testing to people presenting with mild to moderate flu-like symptoms to  
32 123 any of the 92 sentinel surveillance sites (GPs and paediatric practices) beginning February 24, 2020.<sup>24</sup> The new  
33 124 service supplemented the existing national health hotline for people at risk of COVID-19.<sup>25</sup> RT-qPCR is an  
34 125 established technique to detect viral RNA from nasopharyngeal sampling used to diagnose COVID-19.<sup>26</sup> Early  
35 126 detection of SARS-CoV-2 is essential for effective contact tracing,<sup>27</sup> and whole genome sequencing may provide  
36 127 data on dynamics of transmission.<sup>28</sup>

37  
38 128

39 129 The overall aim of this work is to test whether rapid early RT-qPCR testing in primary care can accurately and  
40 130 timely detect SARS-CoV-2, and inform outbreak surveillance. To attest this, we report the outcomes of SARS-  
41 131 CoV-2 RT-qPCR testing at a sentinel GP in the ski-resort of Schladming-Dachstein, Austria. We report a) the  
42 132 accuracy (via sensitivity and specificity) of rapidly deployed RT-qPCR testing in patients presenting with acute  
43 133 infection by comparing it to anti-SARS-CoV-2 antibody status during convalescence in the same geographically  
44 134 defined study cohort; b) the earliness of viral RNA detection by comparing the duration, number and type of  
45 135 symptoms among patients presenting during the first half (early presenters) and the second half (late presenters)  
46 136 of the outbreak, measured by the number of days from the first to the last case detected and dividing that period  
47 137 by two; c) the identification of key clinical symptoms of acute and convalescent disease and determine a  
48 138 correlation between these; and d) the number of SARS-CoV-2 clades implicated in the outbreak.

139

## 140 METHODS

### 141 Setting

142 This study was set in a sentinel GP participating in the National Influenza Surveillance Network in the ski-resort  
143 of Schladming-Dachstein, political subdistrict of Groebming (population 22,829), Austria. The study was  
144 conducted during a local COVID-19 outbreak in March and April 2020, during which 29 cases were detected by  
145 RT-qPCR locally. The bulk of the outbreak occurred after a 3-day party (March 13-15) prior to implementation  
146 of the national lockdown policy on March 16, which led to premature termination of the skiing season. All patients  
147 presenting with mild to moderate flu-like illness were included. Following the report of the first cases in Austria,  
148 people with flu-like symptoms were advised to call the national health hotline instead of directly presenting to the  
149 hospital or GP. Patients were advised to phone the GP or receive in-home testing by mobile testing units, and  
150 home self-isolate and self-care. Asymptomatic people were excluded from this study.

151

### 152 Design

153 We conducted a longitudinal evaluation comprising a prospective cohort to examine the impact of SARS-Cov-2  
154 RT-qPCR testing on COVID-19 case detection. Between February 24 and April 03, 2020, RT-qPCR testing and  
155 seropositivity data were collected to compare two groups within this cohort of patients:

- 156 • Patients testing RT-qPCR reactive at presentation with acute disease
- 157 • Patients confirmed anti-SARS-CoV-2 antibody positive during the convalescence phase (confirmed infection).

158 We define acute disease as the presence of flu-like symptoms combined with reactive SARS-CoV-2 RT-qPCR  
159 and positive serostatus; and confirmed infection as the presence of convalescent anti-SARS-CoV-2 antibody 3-6  
160 weeks after the acute illness, irrespective of the RT-qPCR result.

161

### 162 Intervention

163 On February 24, 2020, one day before the first two cases were reported in Austria, the National Influenza  
164 Screening Network was enhanced to include SARS-CoV-2 RT-qPCR testing.

165 Patients with mild to moderate flu-like symptoms calling the study sentinel GP were offered same day  
166 appointments for SARS-CoV-2 RT-qPCR testing. RT-qPCR results were available within 24 hours, and those  
167 patients with a reactive outcome were immediately notified by a clinician and advised to self-isolate for a  
168 minimum of two weeks following national policy at that time. Repeat follow-up RT-qPCR was arranged by the  
169 local public health authority (District Commissioner of Liezen, Austria), and people testing non-reactive on repeat  
170 RT-qPCR were released from self-isolation. After 3-6 weeks, venous blood was obtained to confirm SARS-CoV-2  
171 infection using ELISA IgG and neutralizing antibody assay. We defined the period of the outbreak as the number  
172 of days from the first patient to the last patient testing RT-qPCR reactive at the GP.

173

1  
2  
3 174 Since the winter season 2000/2001, the National Influenza Screening Network has conducted influenza screening  
4 175 for patients attending sentinel GPs and paediatric practices. Between November and March of each year,  
5 176 participating practices routinely collect nasopharyngeal swabs from patients presenting with flu-like symptoms.  
6 177 Specimens are sent to the Center for Virology, Medical University of Vienna, Austria, for virus isolation on tissue  
7 178 cultures and PCR detection. This surveillance programme allows for near real-time recording of seasonal  
8 179 influenza virus activity in the country.

### 12 180 **Clinical data**

14 181 We obtained anonymous patient data held within the GP computer system. The practice lead clinician (OL)  
15 182 generated a clinical master case report form before extracting pseudonymised patient records into an Excel  
16 183 spreadsheet. EMH and CH verified the accuracy of the data extraction for all patients. Data were stored on a  
17 184 secure computer at the Institute of General Practice and Evidence-based Health Services Research, University of  
18 185 Graz, Austria, before sharing it with the study statistician (JPG) using encrypted email and secure storage at the  
19 186 University of Oxford, UK.

23 187

### 25 188 **Testing**

#### 27 189 RT-qPCR

28 190 SARS-CoV-2 RT-qPCR was performed in scope of the routine surveillance at the Center for Virology, Medical  
29 191 University of Vienna on a Roche LightCycler (<http://www.roche.com>; Switzerland) using a primer-set provided  
30 192 by TIB MOLBIOL (<https://www.tib-molbiol.com/>; Germany).<sup>26</sup> RT-qPCR targeting the E-gene was considered  
31 193 reactive at a cycle threshold (Ct) value of less than 40, and Ct values above 32 were confirmed by RNA-dependent  
32 194 RNA polymerase (RdRP) gene detection.

#### 36 195 Enzyme linked immune assays (ELISA)

37 196 IgG serostatus assays were performed according to the manufacturers' protocol using five different commercial  
38 197 test kits of Anti-SARS-CoV-2 IgG enzyme immune linked assays (ELISA) provided by the following companies:  
39 198 EUROIMMUN (EUROIMMUN Medizinische Labordiagnostika AG, [www.euroimmun.com](http://www.euroimmun.com)),<sup>29</sup> and EPITOPE  
40 199 DIAGNOSTICS (Immunodiagnostik AG [www.euroimmun.com](http://www.euroimmun.com)) respectively.<sup>30</sup> Reagent wells of the Anti-  
41 200 SARS-CoV-2 IgG ELISA are coated with recombinant antigen derived from the spike protein (S1 domain) of  
42 201 SARS-CoV-2. Reagent wells of the EDI<sup>TM</sup> Novel Coronavirus COVID-19 IgG ELISA are coated with COVID-  
43 202 19 recombinant full length nucleocapsid protein. ABBOTT performed on the Architect platform (ABBOTT  
44 203 LABORATORIES INC., [www.abbott.com](http://www.abbott.com)), DIASORIN (DIASORIN S.p.A, <https://www.diasorin.com/home>)  
45 204 performed on the LIAISON<sup>®</sup> platform and ROCHE performed on the cobas e 801 analyzer. The Abbott SARS-  
46 205 CoV-2 IgG assay is a chemiluminescent microparticle immunoassay (CMIA) for the qualitative detection of IgG  
47 206 against a recombinant SARS-CoV-2 nucleoprotein. Results are reported in form of an index value (S/C).  
48 207 LIAISON<sup>®</sup> SARS-CoV-2 S1/S2 IgG assay is a chemiluminescence immunoassay (CLIA) for the quantitative  
49 208 detection of IgG against the recombinant S1 and S2 domain of the spike protein. Results are reported in arbitrary  
50 209 units (AU/mL). Elecsys<sup>®</sup> Anti-SARS-CoV-2 assay (Roche Diagnostics) is a electrochemiluminescence  
51 210 immunoassay (ECLIA) for qualitative detection of SARS-CoV-2 antibodies in human serum against a  
52 211 recombinant nucleocapsid protein of SARS-CoV-2. It is a total antibody assay not differentiating between IgA,

212 IgM or IgG but detecting IgG predominantly. Results are reported as numeric values in form of signal  
213 sample/cutoff (COI).

214 Neutralising antibody assay

215 Samples with discordant antibody results (see below) were further evaluated using an in-house neutralising  
216 antibody assay as follows: Serial dilutions of heat-inactivated serum samples were incubated with 50-100 TCID<sub>50</sub>  
217 SARS-CoV-2 (hCoV-19/Austria/CeMM0360/2020; GISAID EPI\_ISL: 438123) for 1h at 37 °C. The mixture was  
218 added to Vero E6 (ATCC ® CRL-1586) cell monolayers and incubation was continued for two to three days. NT  
219 titers were expressed as the reciprocal of the serum dilution that protected against virus-induced cytopathic effects.  
220 NT titers  $\geq 10$  were considered positive. The study has been reported in accordance with STARI reporting  
221 guidelines for implementation studies.<sup>31</sup>

222

### 223 **Outcome measures and statistical analysis**

224 We present a descriptive statistics of patient demographics including age, gender and ethnicity; and the following  
225 four testing, viral and genomic outcomes:

226 **Outcome A:** The diagnostic accuracy (using sensitivity and specificity) of SARS-CoV-2 RT-qPCR among  
227 patients with mild to moderate flu-like symptoms at presentation by comparing molecular diagnosis with anti-  
228 SARS-CoV-2 antibody testing during convalescence, and hospital admission and death, including any alternative  
229 diagnoses for patients testing SARS-CoV-2 negative. To determine the accuracy of RT-qPCR, we stratified RT-  
230 qPCR results in four groups: true reactive (RT-qPCR reactive and confirmed antibody positive); false reactive  
231 (RT-qPCR reactive, antibody negative); true non-reactive (RT-qPCR non-reactive, antibody negative); and false  
232 non-reactive (RT-qPCR non-reactive, antibody positive).

233 **Outcome B:** The earliness of RT-qPCR testing by comparing the duration and number of symptoms during the  
234 first half of the outbreak (early presenters) and during the second half of the outbreak (late presenters). We  
235 calculated the earliness of RT-qPCR testing by determining the mean duration of symptoms, in days (range), and  
236 mean number of symptoms (range), across the three cohorts of patients with confirmed infection: early acute, late  
237 acute and late convalescent. The three cohorts were obtained by stratifying people with confirmed infection  
238 according to the date of presentation to the GP during the outbreak as follows: people presenting with acute  
239 infection (RT-qPCR reactive, confirmed antibody positive) during the first half of the outbreak (early acute  
240 disease) vs. those people presenting during the second half of the outbreak (late acute); and those people presenting  
241 with previous disease (RT-qPCR non-reactive but confirmed antibody positive) in the second half of the outbreak  
242 (late convalescent).

243 **Outcome C:** The key clinical symptoms associated with RT-qPCR reactivity (acute infection) and convalescent  
244 sero-positivity (confirmed infection) to determine any potential correlation between these stages of disease. We  
245 used multivariate logistic regression tested the association of 15 clinical symptoms with RT-qPCR reactivity at  
246 presentation and among all patients with confirmed infection. We reported the odds ratios (ORs) and the  
247 significance value ( $p$ ) of each covariate on testing RT-qPCR reactive, and confirmed positive antibody status  
248 respectively. We quantified the association between patients with reactive RT-qPCR (and confirmed antibody

249 positive) and all patients with confirmed infection by calculating the correlation coefficient  $r$ , and estimating the  
250 95% CI.

251 **Outcome D:** The number of viral clades implicated in the outbreak. To do this, SARS-CoV-2 full genome  
252 sequencing was undertaken as part of a wider study covering the whole of Austria.<sup>28</sup> The full-length sequences  
253 were matched to patient records by an anonymized unique identifier and uploaded to the Global Initiative on  
254 Sharing All Influenza Data (GISAID) database (<http://gisaid.org>).<sup>32</sup> Sequences were aligned in MEGA7 and non-  
255 synonymous nucleotide variants were identified to determine the respective clades, following the GISAID  
256 classification scheme for lineages.<sup>33</sup>

## 258 RESULTS

### 259 Overall testing results

260 Baseline characteristics for confirmed cases were similar for sex, age, and ethnic origin (Table 1). All patients  
261 were local residents and no endemic cases were documented among tourists. Figure 1 shows the flow-chart for  
262 the patient cohorts of this study. 73 patients presented with mild to moderate flu-like illness, all of whom received  
263 SARS-CoV-2 RT-qPCR (and influenza qPCR). Of those, 16 (21.9%) tested RT-qPCR reactive and 57 (78.1%)  
264 tested non-reactive, including four that tested influenza PCR reactive. Due to lack of venous blood sampling  
265 (obtained 3-6 weeks after initial presentation), antibody data was not available for 7 patients (1 RT-qPCR reactive  
266 vs. 6 non-reactive) that were excluded from this analysis. Therefore, of the 66 patients included in this analysis,  
267 22 patients (33.3%) had SARS-CoV-2 infection confirmed by antibody testing and 44 (66.7%) patients were  
268 confirmed seronegative. Of the former, eight patients (early acute presenters) presented in the first half of the  
269 outbreak (12 days from March 11 to 22, 2020) and 14 patients presented in the second half (March 23 to April  
270 03, 2020); of the latter, seven patients were late acute and seven late convalescent (Figure 2A). Alternative  
271 diagnoses of the 44 patients who tested SARS-CoV-2 negative included: influenza and infectious mononucleosis  
272 (N=2, each); bacterial tonsillitis, bacterial pneumonia, bronchitis and exacerbation of chronic obstructive  
273 pulmonary disease (COPD) (N=1, each) (see flow-chart, Figure 1). No hospital admissions or deaths were  
274 reported.

275 **Table 1: Summary of the demographic characteristics of COVID-19 cases.**

|             | People with confirmed infection<br>(seropositive, any RT-qPCR result)<br>(N=22) | People with acute infection<br>(RT-qPCR reactive and seropositive)<br>(N=15) |
|-------------|---------------------------------------------------------------------------------|------------------------------------------------------------------------------|
| Sex         |                                                                                 |                                                                              |
| Female      | 14 (63.6%)                                                                      | 9 (60%)                                                                      |
| Male        | 8 (36.4%)                                                                       | 6 (40%)                                                                      |
| Age (years) |                                                                                 |                                                                              |
| 16-24       | 4 (26.7%)                                                                       | 3 (20%)                                                                      |

|               |           |           |
|---------------|-----------|-----------|
| 25-34         | 4 (26.7%) | 2 (13.3%) |
| 35-49         | 6 (40%)   | 4 (26.7%) |
| >50           | 8 (36.4%) | 6 (40%)   |
| Ethnic origin |           |           |
| White         | 22 (100%) | 15 (100%) |

276

### 277 **Specificity and sensitivity of RT-qPCR**

278 In the absence of a gold standard, we used a consensus statement on serostatus, irrespective of RT-qPCR  
 279 outcomes, to establish whether an infection had occurred. We considered an infection as confirmed in any patient  
 280 who tested IgG ELISA positive on all five screening platforms (concordant results) or in any patient with  
 281 mismatch between ELISA test results (discordant results) but positive neutralising antibody assay (see flow-chart,  
 282 Figure 1). Of the 15 patients with reactive RT-qPCR, sera from nine patients were concordant positive and six  
 283 were discordant; and of the 53 patients with non-reactive RT-qPCR, sera from 41 patients were concordant  
 284 negative, 5 were concordant positive, and three were discordant. Sera from two patients diagnosed with influenza  
 285 who tested RT-qPCR non-reactive were concordant negative and included in this analysis. For the nine patients  
 286 with discordant results, we used neutralising antibody assay to confirm infection status. All patients (N=6) with  
 287 reactive RT-qPCR were neutralising antibody positive; and of the three patients with non-reactive RT-qPCR, two  
 288 were neutralising antibody positive, and one was negative. Therefore, overall, when combining ELISA and  
 289 neutralising antibody assay, 22 patients had confirmed infection, of whom 15 patients were RT-qPCR reactive  
 290 (true reactive) and seven were non-reactive (false non-reactive). There were no false reactive RT-qPCR results.  
 291 Therefore, RT-qPCR correctly identified infection in 15/22 patients (overall sensitivity of 68.1%). Sensitivity of  
 292 RT-qPCR among all acute (early and late) presenters and during the first half of the outbreak was high (100%),  
 293 but dropped to 50% in the second half of the outbreak. RT-qPCR correctly identified absence of infection for all  
 294 44 patients testing antibody negative (true non-reactive) indicating specificity of 100%.

295

### 296 **Earliness of RT-qPCR testing**

297 The mean duration of symptoms was 2 days (range 1-4) among early acute presenters, 4.4 days (range 1-7) among  
 298 late acute presenters, 8 days (range 2-12) among people with late convalescent infection, and 3.9 days (range 1-  
 299 14) among non-COVID-19 controls (Figure 2B). The mean number of symptoms was 6.75 (range 4-9) among  
 300 early acute presenters, 6.86 (3-12) among late acute presenters, 6.3 (1-11) among people with convalescent  
 301 infection, and 5.23 (range 2-11) among non-COVID-19 controls (Figure 2C).

302

### 303 **Regression analysis on confirmed infection**

304 Multivariate regression on all 66 patients, including 22 (31.9%) with confirmed infection, suggested that loss of  
 305 taste, but not loss of smell, was the key covariate significantly associated with positive serostatus (ORs=6.03;

306 p=0.047) (Table 2). Breathlessness (OR=6.9, p=0.054) and cough (OR=0.12, p=0.053) were also possible  
 307 covariates of confirmed infection.

308 **Table 2: Regression analysis on symptoms reported by patients diagnosed with COVID-19.**

| Clinical symptom | People with confirmed infection (seropositive, any RT-qPCR result) (N=22) |               |         | People with acute disease (RT-qPCR reactive and seropositive) (N=15) |                 |         |
|------------------|---------------------------------------------------------------------------|---------------|---------|----------------------------------------------------------------------|-----------------|---------|
|                  | Odds ratio                                                                | 95% CI        | p-value | Odds ratio                                                           | 95% CI          | p-value |
| Change in taste  | 6.02                                                                      | (1.02,35.51)  | 0.047   | 571.72                                                               | (1.92,170629.2) | 0.029   |
| Nausea/vomiting  | 4.42                                                                      | (0.748,26.09) | 0.101   | 370.11                                                               | (2.71,50429.42) | 0.018   |
| Sore throat      | 0.36                                                                      | (0.067,1.93)  | 0.233   | 0.002                                                                | (0.000006,0.74) | 0.039   |
| Myalgia          | 1.15                                                                      | (0.24,5.51)   | 0.865   | 121.82                                                               | (1.52,9749.08)  | 0.032   |
| Breathlessness   | 6.90                                                                      | (0.96,49.40)  | 0.054   | 134.46                                                               | (1.02,17796.87) | 0.049   |
| Change in smell  | 0.77                                                                      | (0.098,6.15)  | 0.811   | 0.37                                                                 | (0.008,15.87)   | 0.607   |
| Fever            | 2.97                                                                      | (0.44,20.35)  | 0.266   | 1.44                                                                 | (0.057,36.66)   | 0.825   |
| Cough            | 0.12                                                                      | (0.014,1.03)  | 0.053   | 0.011                                                                | (0.00008,1.42)  | 0.069   |

309 **Caption to Table 2:** Symptoms associated with confirmed SARS-CoV-2 infection (antibody confirmed positive,  
 310 irrespective of RT-qPCR result) among 22 patients, and with acute infection (RT-qPCR reactive, antibody  
 311 confirmed positive) among 15 patients respectively.

312

### 313 **Regression analysis on acute disease**

314 All 15 patients with acute disease reported fatigue and therefore this covariate was removed from the analysis;  
 315 and observations from two patients with non-reactive RT-qPCR, who did not report fatigue, were also removed  
 316 (Table 2). The multivariate logistic regression on the remaining 66 patients showed that the following covariates  
 317 were associated with acute disease: loss of taste (OR=571.72; p=0.029), nausea and vomiting (OR=370.11;  
 318 p=0.018), breathlessness (OR=134.46; p=0.049), myalgia (OR=121.82; p=0.032) and sore throat (OR=0.002,  
 319 p=0.039); and but not loss of smell (OR=0.37, p=0.607), fever (OR=1.44, p=0.825) or cough (OR=0.01,  
 320 p=0.069).

321

### 322 **Correlation between acute and confirmed infection**

323 Testing RT-qPCR reactive was correlated with testing seropositive for COVID-19 infection ( $r=0.77$ , 95%CI  
 324 0.65~0.89). Among early and acute presenters, the correlation between the two tests was perfect (green and amber  
 325 in Figure 2D), irrespective of the stage of the outbreak; whereas in the second half of the outbreak, RT-qPCR did  
 326 not detect any case with convalescent infection (red curve on Figure 2D).

327

328 **Viral clade analysis**

329 Thirteen of 15 full-length genome sequences were available for clade analysis via GISAID (Table 3); and two  
 330 sequences were not available at the time of analysis. Lineages of SARS-CoV-2 have been identified based on  
 331 mutations in key amino acid positions.<sup>33</sup> Clade G is defined by the mutations D614G, C241T, C3037T and  
 332 A23403G in the Spike protein; and clade GR by additional RG203KR mutations in the Nucleocapsid protein N;  
 333 clade L is most closely related to the Wuhan reference strain (NC\_045512.2).<sup>34</sup> Accordingly, among the 13 viral  
 334 isolates, three different clades were identified, including clade L (N=2), GR (N=4) and L (N=7).

335 **Table 3: Genomic sequences accessed via GISAID listing key amino acid locations used for SARS-CoV-2**  
 336 **classification.**

| Disease Classification | Virus Name (GISAID)           | EPI_ISL_# | Date of RT-qPCR | Lineage    | ORF 8: 84 | ORF3a: 57 | S:614* | N:203** | N:204** |
|------------------------|-------------------------------|-----------|-----------------|------------|-----------|-----------|--------|---------|---------|
| Early acute            | hCoV-19/Austria/CeMM0191/2020 | 438032    | 13/03/2020      | B(L)       | L         | Q         | D      | R       | G       |
| Early acute            | hCoV-19/Austria/CeMM0248/2020 | 438078    | 21/03/2020      | B (L)      | L         | Q         | D      | R       | G       |
| Early acute            | hCoV-19/Austria/CeMM0018/2020 | 419671    | 19/03/2020      | B.1.1 (GR) | L         | Q         | G      | K       | R       |
| Early acute            | hCoV-19/Austria/CeMM0228/2020 | 438061    | 18/03/2020      | B.1.1 (GR) | L         | Q         | G      | K       | R       |
| Early acute            | hCoV-19/Austria/CeMM0235/2020 | 438066    | 19/03/2020      | B.1.1 (GR) | L         | Q         | G      | K       | R       |
| Early acute            | hCoV-19/Austria/CeMM0250/2020 | 438080    | 21/03/2020      | B.1.1 (GR) | L         | Q         | G      | K       | R       |
| Early acute            | hCoV-19/Austria/CeMM0222/2020 | 438056    | 17/03/2020      | B.1.8 (G)  | L         | Q         | G      | R       | G       |
| Early acute            | hCoV-19/Austria/CeMM0249/2020 | 438079    | 21/03/2020      | B.1.8 (G)  | L         | Q         | G      | R       | G       |
| Late acute             | hCoV-19/Austria/CeMM0267/2020 | 438096    | 24/03/2020      | B.1.8 (G)  | L         | Q         | G      | R       | G       |
| Late acute             | hCoV-19/Austria/CeMM0276/2020 | 438103    | 25/03/2020      | B.1.8 (G)  | L         | Q         | G      | R       | G       |
| Late acute             | hCoV-19/Austria/CeMM0303/2020 | 475778    | 29/03/2020      | B.1.8 (G)  | L         | Q         | G      | R       | G       |
| Late acute             | hCoV-19/Austria/CeMM0324/2020 | 475794    | 01/04/2020      | B.1.8 (G)  | L         | Q         | G      | R       | G       |
| Late acute             | hCoV-19/Austria/CeMM0337/2020 | 475800    | 03/04/2020      | B.1.8 (G)  | L         | Q         | G      | R       | G       |

337 **Caption Table 3:** SARS-CoV-2 clades are classified by The Global Initiative on Sharing All Influenza Data  
 338 (GISAID) using specific non-synonymous mutations in the viral genome. Clade G is defined by the mutations  
 339 D614G, C241T, C3037T and A23403G in the Spike protein; and clade GR by additional RG203KR mutations in  
 340 the Nucleocapsid protein N; clade L is most closely related to the Wuhan reference strain (NC\_045512.2).<sup>34</sup> Whole  
 341 genome data were available for 13/15 sequences; data for two sequences were not available at the time of analysis.  
 342 Accordingly, among the 13 sequences analysed, three different clades were identified, including clades L (N=2),  
 343 GR (N=4) and G (N=7). All three clades were detected in early acute infection, and clade G was additionally  
 344 detected in late acute infection. \*For simplicity reasons, only mutation D614G (grey background) in the Spike  
 345 protein defining clade G is shown. \*\*Additional mutations R203K and G204R in the Nucleocapsid protein N  
 346 defining clade GR are also shown in grey. ORF, open reading frame.

347

348 **DISCUSSION**

349 Our results demonstrate that SARS-CoV-2 RT-qPCR testing, when added to a national influenza surveillance  
 350 programme in primary care, can rapidly, early and accurately diagnose COVID-19 during an outbreak. Of the 73



1  
2  
3 351 patients presenting to the sentinel GP, 22 were diagnosed with COVID-19, including 15 patients with acute  
4 352 disease and seven with late convalescent infection respectively. The sensitivity and specificity of RT-qPCR were  
5 353 68.1% and 100%, but testing RT-qPCR reactive showed perfect correlation with seropositivity during the first  
6 354 half of the outbreak and among early acute (N=8 patients) and late acute presenters (N=7). Strikingly, the mean  
7 355 duration of symptoms of early presenters (2 days) was less than half of late acute presenters (4.4 days) and a  
8 356 quarter of late convalescent presenters (8 days). These findings highlight the need to undertake RT-qPCR testing  
9 357 rapidly and early as soon as symptoms occur. Acute infection was strongly associated with multiple symptoms,  
10 358 including loss of taste, nausea and vomiting, breathlessness, myalgia and sore throat; but loss of smell, fever and  
11 359 cough were not. Surprisingly, loss of taste, but not any other clinical symptom, was significantly associated with  
12 360 convalescent infection. Finally, viral genome analysis demonstrated the presence of three major SARS-CoV-2  
13 361 clades during the outbreak, suggesting that the outbreak was the result of independent transmission chains.  
14 362

15 363 Overall our findings help untangle COVID-19 infection during an outbreak in a ski-resort in Austria. Our results  
16 364 suggest that acute COVID-19 may be associated with a spectrum of symptoms and presence of multiple strains  
17 365 within one setting. This highlights the heterogeneity of coronavirus and the importance in containing outbreaks  
18 366 early before spread. While effective test-trace-isolate (TTI) strategies have been suggested as the key to containing  
19 367 the outbreak without intermittent lockdowns,<sup>35</sup> we suggest that systemic changes may also be needed. For  
20 368 example, behavioral changes, such as large-scale gathering of people in closed spaces has to be avoided as they  
21 369 may trigger emergence of individual clusters to form a superspreading event. Keeping a level of compliance to  
22 370 social distancing and reduced physical contacts is necessary to prevent any future wave. Enhanced testing is an  
23 371 important factor, and our study suggests that testing in primary care at symptom onset is highly accurate and  
24 372 should be something that governments should consider as an additional strategy.  
25 373

26 374 Loss of taste of smell has been recognised as an important marker of COVID-19;<sup>36,37</sup> however, more than half of  
27 375 patients reported olfactory dysfunction after the onset of other symptoms when sensitivity of RT-qPCR may be  
28 376 reduced.<sup>38</sup> Furthermore, loss of taste could not be objectively confirmed in one third of people<sup>38</sup> suggesting self-  
29 377 assessment using a mobile phone application may not be as accurate as clinician-initiated RT-qPCR testing of  
30 378 people presenting with acute disease.<sup>39</sup> Timely and accurate testing is also a prerequisite for effective contact  
31 379 tracing.<sup>27</sup>  
32 380

33 381 The outbreak we explored occurred after a three-day party (March 13-15) just before the skiing season was  
34 382 brought to a premature end due to the Austrian national lockdown measures on March 16. The index case was  
35 383 diagnosed on March 11 and the first secondary cases were reported two days after the celebrations. Therefore, it  
36 384 is possible that the outbreak we are describing here could be a possible superspreading event. Superspreading  
37 385 events have been associated with high intensity aerosol producing activities (shouting, singing) in confined spaces  
38 386 and potentially, the lockdown party might have triggered the local outbreak. The two acute disease clusters  
39 387 observed in this study may represent different types of viral exposure. First, inhalation of high-density aerosols at  
40 388 the party causing acute illness among early presenters and second, low level home transmission of party goers to  
41 389 (late presenting) friends and family during the lockdown. In our study, no COVID-19 cases were observed among  
42 390 children (persons <18 years of age), suggesting that any infected children may have remained asymptomatic or

1  
2  
3 391 did not attend the practice because of mild disease.<sup>40</sup> No further endemic cases were detected after the outbreak.  
4 392 This suggests that combination prevention including rapid testing and case notification in primary care, contact  
5 393 tracing and isolation, and lockdown measures can effectively terminate an outbreak. To our knowledge, our study  
6 394 is the first to demonstrate that the ECDC policy of additional COVID-19 screening at national influenza screening  
7 395 sites can effectively detect and control a regional outbreak.<sup>21</sup>  
8  
9

10 396  
11  
12 397 Our study has many strengths. Our study was enabled by data from a well-established sentinel GP, participating  
13 398 in the National Influenza Screening Programme, covering the entire area of the outbreak. Importantly, national  
14 399 SARS-CoV-2 screening was adopted early, starting the day before the first two cases were reported in Austria;  
15 400 and 16 of 29 cases documented in the Schladming-Dachstein region, including the first and the last case, were  
16 401 detected at the sentinel GP. RT-qPCR testing was rapidly deployed by offering same day GP appointments, and  
17 402 result reporting and case notification within 24 hours. Rapid adoption of new commercial antibody platforms (Lab  
18 403 Mustafa, Salzburg) and in-house neutralising antibody testing assay (Medical University of Vienna) enabled  
19 404 accurate interpretation of RT-qPCR results.  
20  
21  
22  
23  
24

25 405  
26 406 There are some limitations of our study. We used a relatively small patient cohort from a single sentinel GP,  
27 407 potentially limiting conclusions on causality and generalisability of our finding to other areas excluding seven  
28 408 patients for whom COVID-19 serostatus were not available. Lack of association with high fever and cough in our  
29 409 COVID-19 cohort may be due to the national health hotline directing patients with more severe disease to attend  
30 410 emergency service. Therefore, people with these symptoms might have preferred to attend acute services rather  
31 411 than the GP. Although we collected data prospectively, recall bias cannot be excluded. This could be suggested  
32 412 by the lack of association of symptoms of acute infection (nausea and vomiting, breathless and myalgia) among  
33 413 all people confirmed with infection (when including those with negative RT-qPCR), compared to those people  
34 414 presenting early (reactive RT-qPCR). Specific recall bias of taste is less likely, as it featured in both groups and  
35 415 data collection was completed prior to publication of the first systematic review of altered taste and smell in the  
36 416 media.<sup>41</sup> However, change or loss in smell/taste were not quantified using an established tool such as the visual  
37 417 analogue scale (VAS),<sup>42,43</sup> but rather assessed by simple “yes” and “no” answers using a standard clinical  
38 418 questionnaire, potentially leading to response style bias. Although asymptomatic infection is common,<sup>9</sup>  
39 419 asymptomatic people were excluded from this study as we were focusing on symptom-driven presentation. This  
40 420 potentially excludes an important segment of the infected population and future studies will focus on exploring  
41 421 this further. The presence of three viral clades within the outbreak suggests heterogeneity of the virus, but we  
42 422 have not explored this aspect in great details in this study, as this was beyond the scope of this work. In fact, the  
43 423 data presented here is part of the ongoing work untangling the phylogeny of SARS-CoV-2 clades in Austria and  
44 424 their worldwide spread.<sup>28</sup>  
45  
46  
47  
48  
49  
50  
51  
52  
53

54 425  
55  
56 426 To our knowledge, this is the first study to show that primary care can contribute to early case detection and  
57 427 termination of a SARS-CoV-2 outbreak in the community. Our study has important implications for patients,  
58 428 public health, and health systems; nationally and internationally for outbreak epidemiology and control. As  
59  
60

1  
2  
3 429 countries enter the viral suppression phase, early detection will be crucial in the prevention and control of the  
4 430 disease. Early testing at onset of disease, followed by timely contact tracing and case isolation of secondary cases  
5 431 should prevent onward transmission and reduce the reproduction number  $R_e$  below 1. Austria has increased the  
6 432 number of its sentinel sites from 91 to 231 due to COVID-19, indicating that primary care has become an essential  
7 433 partner in a comprehensive surveillance strategy for disease prevention and control. Clade analysis could greatly  
8 434 enhance public health surveillance in the UK where only three quarters of contact tracing is being completed.<sup>44</sup>  
9 435 Key priorities for future research include systematic prospective quantitative and qualitative evaluation of the  
10 436 Austrian National SARS-CoV-2 screening programme during the seasonal influenza season, and generalisability  
11 437 of the intervention in multi-ethnic inner-city settings including genomic analysis using deep viral genome  
12 438 sequencing to support complex contact tracing, and adaption of the REAP-1 protocol to include SARS-CoV-2  
13 439 lateral flow antigen testing.

19 440

## 21 441 CONCLUSIONS

23 442 RT-qPCR testing in primary care can rapidly and accurately detect SARS-CoV-2 among people presenting with  
24 443 mild-to-moderate illness in a heterogeneous viral community outbreak. This study demonstrates high rates of  
25 444 accurate and early viral detection associated with symptomatic testing in primary care during a COVID-19  
26 445 outbreak, which is required for an effective TTI strategy. Targeted testing in primary care can support national  
27 446 sentinel surveillance of coronavirus.

30 447

32 448 **Authors' Contributions:** WL, OL, MRF, MEMK, EMH, CH and JPG contributed to the design of the study.  
33 449 OL and EMH took nasopharyngeal swabs. OL, EMH and CH maintained the clinical data base. AS and RG  
34 450 submitted the ethics application. MRF provided RT-qPCR data; BA, AL, AMP, JWG, TP, SA, CB and AB; and  
35 451 JVC conducted clade analysis, MEMK produced ELISA data, KS performed the neutralising antibody assay.  
36 452 JPG and WL conducted the statistical analysis. WL and JPG wrote the manuscript with contributions from OL,  
37 453 MRF, MEMK, RCG, JVC, CB, AB, KS, EMH, CH, AS and CG. All authors read and approved the final  
38 454 version.

43 455 **Acknowledgments:** We thank Evelyn Marktl for daily updates on the Christian Drosten's COVID-19 podcast  
44 456 (<https://www.ndr.de/nachrichten/info/podcast4684.html>). We are grateful to the team of Praxis Dr Lammel for  
45 457 their contributions, and in particular to the nurse Sabine Roiderer for providing direct patient care and help with  
46 458 administration. We thank the patients of Schladming-Dachstein for participating in the study.

49 459 **Funding:** This research was self-funded by each individual co-author. This project received funding from the  
50 460 Vienna Science and Technology Fund (WWTF) as part of the WWTF COVID-19 Rapid Response Funding  
51 461 2020. Award/Grant number is not applicable.

54 462 **Ethics and consent:** The Medical University of Graz Research Ethics Committee (reference number: 32-429 ex  
55 463 19/20) approved collection of anonymised RT-PCR and antibody status data, and the Medical University of  
56 464 Vienna Research Ethics Committee (reference number: EK1339/2017) additionally approved usage of  
57 465 anonymised RT-PCR data collected as part of the National Influenza Surveillance Network including generation

466 of secondary genomic data. Written consent was obtained from all participating patients agreeing on  
467 anonymised data collection for data validation, quality control and research purposes.

468

469 **Patient and public involvement:** No patient involvement.

470 **Data availability statement:** The datasets used and/or analysed during the current study are available from the  
471 corresponding author on reasonable request.

472 **Competing Interests:** None declared.

473

## 474 **References**

- 475 1. World Health Organization (WHO). Clinical management of severe acute respiratory infection  
476 when COVID-19 is suspected, 2020. [https://www.who.int/publications-detail/clinical-management-of-severe-acute-respiratory-infection-when-novel-coronavirus-\(ncov\)-infection-is-suspected](https://www.who.int/publications-detail/clinical-management-of-severe-acute-respiratory-infection-when-novel-coronavirus-(ncov)-infection-is-suspected) (Accessed  
477 May 05, 2021).  
478
- 479 2. Lauer SA, Grantz KH, Bi Q, et al. The Incubation Period of Coronavirus Disease 2019 (COVID-19)  
480 From Publicly Reported Confirmed Cases: Estimation and Application. *Ann Intern Med* 2020; **172**(9):  
481 577-82.
- 482 3. Wölfel R, Corman VM, Guggemos W, et al. Virological assessment of hospitalized patients with  
483 COVID-2019. *Nature* 2020; **581**(7809): 465-9.
- 484 4. Cevik M, Tate M, Lloyd O, Maraolo AE, Schafers J, Ho A. SARS-CoV-2, SARS-CoV-1 and MERS-CoV  
485 viral load dynamics, duration of viral shedding and infectiousness: a living systematic review and meta-  
486 analysis. *medRxiv* 2020: 2020.07.25.20162107.
- 487 5. Byrne AW, McEvoy D, Collins AB, et al. Inferred duration of infectious period of SARS-CoV-2:  
488 rapid scoping review and analysis of available evidence for asymptomatic and symptomatic COVID-19  
489 cases. *BMJ Open* 2020; **10**(8): e039856.
- 490 6. Bullard J, Dust K, Funk D, et al. Predicting infectious SARS-CoV-2 from diagnostic samples. *Clin*  
491 *Infect Dis* 2020.
- 492 7. Endo A, Abbott S, Kucharski AJ, Funk S. Estimating the overdispersion in COVID-19 transmission  
493 using outbreak sizes outside China. *Wellcome Open Res* 2020; **5**: 67.
- 494 8. Sayampanathan AA, Heng CS, Pin PH, Pang J, Leong TY, Lee VJ. Infectivity of asymptomatic versus  
495 symptomatic COVID-19. *Lancet* 2021; **397**(10269): 93-4.
- 496 9. Byambasuren O, Cardona M, Bell K, Clark J, McLaws M-L, Glasziou P. Estimating the extent of  
497 asymptomatic COVID-19 and its potential for community transmission: Systematic review and meta-  
498 analysis. *Official Journal of the Association of Medical Microbiology and Infectious Disease Canada* 2020;  
499 **5**(4): 223-34.
- 500 10. Bi Q, Wu Y, Mei S, et al. Epidemiology and transmission of COVID-19 in 391 cases and 1286 of  
501 their close contacts in Shenzhen, China: a retrospective cohort study. *Lancet Infect Dis* 2020.
- 502 11. Li R, Pei S, Chen B, et al. Substantial undocumented infection facilitates the rapid dissemination of  
503 novel coronavirus (SARS-CoV-2). *Science* 2020; **368**(6490): 489-93.
- 504 12. European Centre for Disease Prevention and Control (ECDC). Rapid Risk Assessment:  
505 Coronavirus disease 2019 (COVID-19) in the EU/EEA and the UK– ninth update, 2020.  
506 [https://www.ecdc.europa.eu/en/publications-data/rapid-risk-assessment-coronavirus-disease-2019-](https://www.ecdc.europa.eu/en/publications-data/rapid-risk-assessment-coronavirus-disease-2019-covid-19-pandemic-ninth-update)  
507 [covid-19-pandemic-ninth-update](https://www.ecdc.europa.eu/en/publications-data/rapid-risk-assessment-coronavirus-disease-2019-covid-19-pandemic-ninth-update) (accessed May 05, 2020).
- 508 13. Koo JR, Cook AR, Park M, et al. Interventions to mitigate early spread of SARS-CoV-2 in Singapore:  
509 a modelling study. *Lancet Infect Dis* 2020.

- 1  
2  
3 510 14. Frieden TR, Lee CT. Identifying and Interrupting Superspreading Events-Implications for Control  
4 511 of Severe Acute Respiratory Syndrome Coronavirus 2. *Emerg Infect Dis* 2020; **26**(6): 1059-66.
- 5 512 15. Kreidl P, Schmid D, Maritschnik S, et al. Emergence of coronavirus disease 2019 (COVID-19) in  
6 513 Austria. *Wien Klin Wochenschr* 2020: 1-8.
- 7  
8 514 16. Popa A, Genger J-W, Nicholson M, et al. Mutational dynamics and transmission properties of  
9 515 SARS-CoV-2 superspreading events in Austria. *bioRxiv* 2020: 2020.07.15.204339.
- 10 516 17. The Independent. 2020. [https://www.independent.co.uk/news/world/europe/coronavirus-](https://www.independent.co.uk/news/world/europe/coronavirus-austria-cases-covid-19-hospital-lockdown-latest-a9466281.html)  
11 517 [austria-cases-covid-19-hospital-lockdown-latest-a9466281.html](https://www.independent.co.uk/news/world/europe/coronavirus-austria-cases-covid-19-hospital-lockdown-latest-a9466281.html) (accessed May 05, 2020).
- 12 518 18. European Centre for Disease Prevention and Control (ECDC). Coronavirus disease 2019 (COVID-  
13 519 19) in the EU/EEA and the UK –ninth update, 2020.  
14 520 [https://www.ecdc.europa.eu/sites/default/files/documents/covid-19-rapid-risk-assessment-](https://www.ecdc.europa.eu/sites/default/files/documents/covid-19-rapid-risk-assessment-coronavirus-disease-2019-ninth-update-23-april-2020.pdf)  
15 521 [coronavirus-disease-2019-ninth-update-23-april-2020.pdf](https://www.ecdc.europa.eu/sites/default/files/documents/covid-19-rapid-risk-assessment-coronavirus-disease-2019-ninth-update-23-april-2020.pdf) (accessed June 02, 2020).
- 16 522 19. de Sutter A, Llor C, Maier M, et al. Family medicine in times of 'COVID-19': A generalists' voice.  
17 523 *Eur J Gen Pract* 2020; **26**(1): 58-60.
- 18 524 20. Hull SA, Williams C, Ashworth M, Carvalho C, Boomla K. Suspected COVID-19 in primary care:  
19 525 how GP records contribute to understanding differences in prevalence by ethnicity. *medRxiv* 2020:  
20 526 2020.05.23.20101741.
- 21 527 21. European Centre for Disease Prevention and Control (ECDC). Strategies for the surveillance of  
22 528 COVID-19, 2020. [https://www.ecdc.europa.eu/sites/default/files/documents/COVID-19-surveillance-](https://www.ecdc.europa.eu/sites/default/files/documents/COVID-19-surveillance-strategy-9-Apr-2020.pdf)  
23 529 [strategy-9-Apr-2020.pdf](https://www.ecdc.europa.eu/sites/default/files/documents/COVID-19-surveillance-strategy-9-Apr-2020.pdf) (accessed July 11, 2020).
- 24 530 22. Roehr B. Covid-19 is threatening the survival of US primary care. *BMJ* 2020; **369**: m2333.
- 25 531 23. Harding-Edgar L, McCartney M, Pollock AM. Test and trace strategy has overlooked importance  
26 532 of clinical input, clinical oversight and integration. *Journal of the Royal Society of Medicine* 2020;  
27 533 **113**(11): 428-32.
- 28 534 24. Zentrum für Virologie Medizinische Universität Wien. Projekt Diagnostisches Influenzanezwerk  
29 535 Österreich (DINÖ). [https://www.virologie.meduniwien.ac.at/wissenschaft-forschung/virus-](https://www.virologie.meduniwien.ac.at/wissenschaft-forschung/virus-epidemiologie/influenza-projekt-diagnostisches-influenzanezwerk-oesterreich-dinoe/)  
30 536 [epidemiologie/influenza-projekt-diagnostisches-influenzanezwerk-oesterreich-dinoe/](https://www.virologie.meduniwien.ac.at/wissenschaft-forschung/virus-epidemiologie/influenza-projekt-diagnostisches-influenzanezwerk-oesterreich-dinoe/) (accessed May  
31 537 28, 2020).
- 32 538 25. Federal Ministry of Social Affairs H, Care and Consumer Protection, Republic of Austria. National  
33 539 Health Hotline 1450. 2019. <https://www.1450.at/1450-die-gesundheitsnummer/> (accessed May 28,  
34 540 2020).
- 35 541 26. Corman V, Bleicker T, Brünink S, et al. Diagnostic detection of 2019-nCoV by real-time RT-PCR,  
36 542 2020. [https://www.who.int/docs/default-source/coronaviruse/protocol-v2-1.pdf?sfvrsn=a9ef618c\\_2](https://www.who.int/docs/default-source/coronaviruse/protocol-v2-1.pdf?sfvrsn=a9ef618c_2)  
37 543 (accessed July 02, 2020).
- 38 544 27. Kretzschmar ME, Rozhnova G, Bootsma MCJ, van Boven M, van de Wijert JHHM, Bonten MJM.  
39 545 Impact of delays on effectiveness of contact tracing strategies for COVID-19: a modelling study. *The*  
40 546 *Lancet Public Health*.
- 41 547 28. Popa A, Genger JW, Nicholson MD, et al. Genomic epidemiology of superspreading events in  
42 548 Austria reveals mutational dynamics and transmission properties of SARS-CoV-2. *Sci Transl Med* 2020;  
43 549 **12**(573).
- 44 550 29. Stadlbauer D, Amanat F, Chromikova V, et al. SARS-CoV-2 Seroconversion in Humans: A Detailed  
45 551 Protocol for a Serological Assay, Antigen Production, and Test Setup. *Curr Protoc Microbiol* 2020; **57**(1):  
46 552 e100.
- 47 553 30. Ahn JY, Sohn Y, Lee SH, et al. Use of Convalescent Plasma Therapy in Two COVID-19 Patients with  
48 554 Acute Respiratory Distress Syndrome in Korea. *J Korean Med Sci* 2020; **35**(14): e149.
- 49 555 31. Pinnock H, Epiphaniou E, Sheikh A, et al. Developing standards for reporting implementation  
50 556 studies of complex interventions (StaRI): a systematic review and e-Delphi. *Implementation Science*  
51 557 2015; **10**(1): 42.

- 1  
2  
3 558 32. Shu Y, McCauley J. GISAID: Global initiative on sharing all influenza data - from vision to reality.  
4 559 *Euro surveillance : bulletin Europeen sur les maladies transmissibles = European communicable disease*  
5 560 *bulletin* 2017; **22**(13).
- 6 561 33. Mercatelli D, Giorgi FM. Geographic and Genomic Distribution of SARS-CoV-2 Mutations.  
7 562 *Frontiers in Microbiology* 2020; **11**(1800).
- 9 563 34. Global Initiative on Sharing All Influenza Data (GISAID). Clade and lineage nomenclature aids in  
10 564 genomic epidemiology studies of active hCoV-19 viruses. 2020.  
11 565 [https://www.gisaid.org/references/statements-clarifications/clade-and-lineage-nomenclature-aids-in-](https://www.gisaid.org/references/statements-clarifications/clade-and-lineage-nomenclature-aids-in-genomic-epidemiology-of-active-hcov-19-viruses/)  
12 566 [genomic-epidemiology-of-active-hcov-19-viruses/](https://www.gisaid.org/references/statements-clarifications/clade-and-lineage-nomenclature-aids-in-genomic-epidemiology-of-active-hcov-19-viruses/) (accessed September 05, 2020).
- 13 567 35. Panovska-Griffiths J, Kerr CC, Stuart RM, et al. Determining the optimal strategy for reopening  
14 568 schools, the impact of test and trace interventions, and the risk of occurrence of a second COVID-19  
15 569 epidemic wave in the UK: a modelling study. *The Lancet Child & Adolescent Health*.
- 17 570 36. Aziz M, Goyal H, Haghbin H, Lee-Smith WM, Gajendran M, Perisetti A. The Association of "Loss of  
18 571 Smell" to COVID-19: A Systematic Review and Meta-Nnalysis. *Am J Med Sci* 2020.
- 19 572 37. von Bartheld CS, Hagen MM, Butowt R. Prevalence of Chemosensory Dysfunction in COVID-19  
20 573 Patients: A Systematic Review and Meta-analysis Reveals Significant Ethnic Differences. *ACS Chem*  
21 574 *Neurosci* 2020; **11**(19): 2944-61.
- 23 575 38. Lechien JR, Chiesa-Estomba CM, Hans S, Barillari MR, Jouffe L, Saussez S. Loss of Smell and Taste  
24 576 in 2013 European Patients With Mild to Moderate COVID-19. *Ann Intern Med* 2020.
- 25 577 39. Menni C, Valdes AM, Freidin MB, et al. Real-time tracking of self-reported symptoms to predict  
26 578 potential COVID-19. *Nat Med* 2020.
- 27 579 40. Maltezou HC, Vorou R, Papadima K, et al. Transmission dynamics of SARS-CoV-2 within families  
28 580 with children in Greece: A study of 23 clusters. *J Med Virol* 2020.
- 30 581 41. Lovato A, de Filippis C. Clinical Presentation of COVID-19: A Systematic Review Focusing on  
31 582 Upper Airway Symptoms. *Ear Nose Throat J* 2020: 145561320920762.
- 32 583 42. Sung Y-T, Wu J-S. The Visual Analogue Scale for Rating, Ranking and Paired-Comparison (VAS-  
33 584 RRP): A new technique for psychological measurement. *Behav Res Methods* 2018; **50**(4): 1694-715.
- 35 585 43. Rojas-Lechuga MJ, Izquierdo-Domínguez A, Chiesa-Estomba C, et al. Chemosensory dysfunction  
36 586 in COVID-19 out-patients. *Eur Arch Otorhinolaryngol* 2020: 1-8.
- 37 587 44. NHS England. NHS Test and Trace – week 4 of contact tracing, England: 18 to 24 June 2020. 2020.  
38 588 [https://www.gov.uk/government/publications/nhs-test-and-trace-statistics-england-18-june-to-24-](https://www.gov.uk/government/publications/nhs-test-and-trace-statistics-england-18-june-to-24-june-2020/weekly-nhs-test-and-trace-bulletin-england-18-24-june-2020)  
39 589 [june-2020/weekly-nhs-test-and-trace-bulletin-england-18-24-june-2020](https://www.gov.uk/government/publications/nhs-test-and-trace-statistics-england-18-june-to-24-june-2020/weekly-nhs-test-and-trace-bulletin-england-18-24-june-2020) (accessed May 05, 2021).

590

591 **FIGURE LEGENDS**

592 Figure 1: Flow-chart. Twenty-two patients had COVID-19 infection confirmed by antibody testing, including 15  
593 patients diagnosed with acute disease (reactive RT-qPCR) and 7 with convalescent disease (non-reactive RT-  
594 qPCR); among the former, 9 patients tested concordant antibody positive and 6 patients tested neutralizing  
595 antibody positive following discordant ELISA result; and among the latter, 5 patients tested concordant  
596 antibody positive and 2 patients tested neutralizing antibody positive following discordant ELISA result. 44  
597 patients with non-reactive RT-qPCR tested antibody negative, including 41 with concordant negative ELISA, 1  
598 patient with negative neutralizing antibody after discordant ELISA result and 2 patients diagnosed with  
599 Influenza. Antibody status was not available for 7 patients. \*\*Final clinical diagnoses included infectious  
600 mononucleosis (N=2); bacterial tonsillitis, bacterial pneumonia, and bronchitis and exacerbation of COPD  
601 (N=1, each). \*\*\*No concordant negatives.

602

1  
2  
3 603 Figure 2: (A) Cumulative COVID-19 diagnosis in the ski-resort Schladming-Dachstein over time. The main  
4 604 outbreak occurred after a three-day party event (March 13 to 15) celebrating the early termination of the skiing  
5 605 season due to National lockdown commencing on March 16. Between March 11 (index case) and April 03 (last  
6 606 endemic case), 8 people were diagnosed with acute infection (RT-qPCR-reactive, confirmed antibody positive)  
7 607 in the first half (12 days from March 11 to 22, 2020) of the outbreak (green colour), and 7 people with late acute  
8 608 infection (amber) and 7 people with convalescent infection (red) were detected during the second half; (B)  
9 609 Cumulative weekly numbers of confirmed COVID-19 cases during the outbreak. RT-qPCR was 100% sensitive  
10 610 among all early acute and late acute presenters. RT-qPCR did not detect any of the late convalescent presenters;  
11 611 (C) Mean duration of symptoms; and (D): Mean number of symptoms.

12  
13  
14  
15  
16 612  
17  
18 613  
19  
20 614  
21  
22  
23  
24  
25  
26  
27  
28  
29  
30  
31  
32  
33  
34  
35  
36  
37  
38  
39  
40  
41  
42  
43  
44  
45  
46  
47  
48  
49  
50  
51  
52  
53  
54  
55  
56  
57  
58  
59  
60

1  
2  
3  
4  
5  
6  
7  
8  
9  
10  
11  
12  
13  
14  
15  
16  
17  
18  
19  
20  
21  
22  
23  
24  
25  
26  
27  
28  
29  
30  
31  
32  
33  
34  
35  
36  
37  
38  
39  
40  
41  
42  
43  
44  
45  
46







1  
2  
3  
4  
5  
6  
7  
8  
9  
10  
11  
12  
13  
14  
15  
16  
17  
18  
19  
20  
21  
22  
23  
24  
25  
26  
27  
28  
29  
30  
31  
32  
33  
34  
35  
36  
37  
38  
39  
40  
41

**STROBE 2007 (v4) Statement—Checklist of items that should be included in reports of *cohort studies***

| Section/Topic                | Item # | Recommendation                                                                                                                                                                       | Reported on page # |
|------------------------------|--------|--------------------------------------------------------------------------------------------------------------------------------------------------------------------------------------|--------------------|
| <b>Title and abstract</b>    | 1      | (a) Indicate the study's design with a commonly used term in the title or the abstract                                                                                               | 2                  |
|                              |        | (b) Provide in the abstract an informative and balanced summary of what was done and what was found                                                                                  | 2,3                |
| <b>Introduction</b>          |        |                                                                                                                                                                                      |                    |
| Background/rationale         | 2      | Explain the scientific background and rationale for the investigation being reported                                                                                                 | 3,4                |
| Objectives                   | 3      | State specific objectives, including any prespecified hypotheses                                                                                                                     | 4                  |
| <b>Methods</b>               |        |                                                                                                                                                                                      |                    |
| Study design                 | 4      | Present key elements of study design early in the paper                                                                                                                              | 5                  |
| Setting                      | 5      | Describe the setting, locations, and relevant dates, including periods of recruitment, exposure, follow-up, and data collection                                                      | 5                  |
| Participants                 | 6      | (a) Give the eligibility criteria, and the sources and methods of selection of participants. Describe methods of follow-up                                                           | 5                  |
|                              |        | (b) For matched studies, give matching criteria and number of exposed and unexposed                                                                                                  | NA                 |
| Variables                    | 7      | Clearly define all outcomes, exposures, predictors, potential confounders, and effect modifiers. Give diagnostic criteria, if applicable                                             | 7,8                |
| Data sources/<br>measurement | 8*     | For each variable of interest, give sources of data and details of methods of assessment (measurement). Describe comparability of assessment methods if there is more than one group | 6,7                |
| Bias                         | 9      | Describe any efforts to address potential sources of bias                                                                                                                            | 6,13               |
| Study size                   | 10     | Explain how the study size was arrived at                                                                                                                                            | 5                  |
| Quantitative variables       | 11     | Explain how quantitative variables were handled in the analyses. If applicable, describe which groupings were chosen and why                                                         | 7,8                |
| Statistical methods          | 12     | (a) Describe all statistical methods, including those used to control for confounding                                                                                                | 7,8                |
|                              |        | (b) Describe any methods used to examine subgroups and interactions                                                                                                                  | 7,8                |
|                              |        | (c) Explain how missing data were addressed                                                                                                                                          | 8                  |
|                              |        | (d) If applicable, explain how loss to follow-up was addressed                                                                                                                       | 8                  |
|                              |        | (e) Describe any sensitivity analyses                                                                                                                                                | NA                 |
| <b>Results</b>               |        |                                                                                                                                                                                      |                    |

|                          |     |                                                                                                                                                                                                              |                   |
|--------------------------|-----|--------------------------------------------------------------------------------------------------------------------------------------------------------------------------------------------------------------|-------------------|
| Participants             | 13* | (a) Report numbers of individuals at each stage of study—eg numbers potentially eligible, examined for eligibility, confirmed eligible, included in the study, completing follow-up, and analysed            | 8                 |
|                          |     | (b) Give reasons for non-participation at each stage                                                                                                                                                         | 8                 |
|                          |     | (c) Consider use of a flow diagram                                                                                                                                                                           | Figure 1 attached |
| Descriptive data         | 14* | (a) Give characteristics of study participants (eg demographic, clinical, social) and information on exposures and potential confounders                                                                     | 8                 |
|                          |     | (b) Indicate number of participants with missing data for each variable of interest                                                                                                                          | 8                 |
|                          |     | (c) Summarise follow-up time (eg, average and total amount)                                                                                                                                                  | 8                 |
| Outcome data             | 15* | Report numbers of outcome events or summary measures over time                                                                                                                                               | 8                 |
| Main results             | 16  | (a) Give unadjusted estimates and, if applicable, confounder-adjusted estimates and their precision (eg, 95% confidence interval). Make clear which confounders were adjusted for and why they were included | 9,10              |
|                          |     | (b) Report category boundaries when continuous variables were categorized                                                                                                                                    | NA                |
|                          |     | (c) If relevant, consider translating estimates of relative risk into absolute risk for a meaningful time period                                                                                             | NA                |
| Other analyses           | 17  | Report other analyses done—eg analyses of subgroups and interactions, and sensitivity analyses                                                                                                               | 9,10              |
| <b>Discussion</b>        |     |                                                                                                                                                                                                              |                   |
| Key results              | 18  | Summarise key results with reference to study objectives                                                                                                                                                     | 11,12             |
| <b>Limitations</b>       |     |                                                                                                                                                                                                              | 13                |
| Interpretation           | 20  | Give a cautious overall interpretation of results considering objectives, limitations, multiplicity of analyses, results from similar studies, and other relevant evidence                                   | 12,13             |
| Generalisability         | 21  | Discuss the generalisability (external validity) of the study results                                                                                                                                        | 13                |
| <b>Other information</b> |     |                                                                                                                                                                                                              |                   |
| Funding                  | 22  | Give the source of funding and the role of the funders for the present study and, if applicable, for the original study on which the present article is based                                                | 14                |

\*Give information separately for cases and controls in case-control studies and, if applicable, for exposed and unexposed groups in cohort and cross-sectional studies.

**Note:** An Explanation and Elaboration article discusses each checklist item and gives methodological background and published examples of transparent reporting. The STROBE checklist is best used in conjunction with this article (freely available on the Web sites of PLoS Medicine at <http://www.plosmedicine.org/>, Annals of Internal Medicine at <http://www.annals.org/>, and Epidemiology at <http://www.epidem.com/>). Information on the STROBE Initiative is available at [www.strobe-statement.org](http://www.strobe-statement.org).
